# Supplementary material for: Time-based LC-MS/MS analysis provides insights into early responses to mechanical wounding, a major trigger to agarwood formation in Aquilaria malaccensis Lam
Source: Royal Society of Chemistry journal article supplement (doi:10.1039/c8ra10616a), 2019-01-01
Supplement: c8ra10616a2.xlsx [file c8ra10616a2.xlsx]

## Sheet: 0 Hours
0 Hours
protein_id	%_identity	alignment_length	mismatches	gap_opens	q._start	q._end	s._start	s._end	e-value	bit_score	GO	EC	Protein name
06-30_47-aMSMS-6550.3192.3195.3.pkl	55	20	9	0	11	30	108	49	0.035	30.4	--	--	--
01-30_47-aMSMS-6550.3440.3444.3.pkl	53.57	28	13	0	3	30	813	896	2e-04	39.7	GO:0010026,GO:0016192,GO:0005829,GO:0006623,GO:0042732,GO:0010119,GO:0051567,GO:0009637,GO:0016197,GO:0010482,GO:0005515,GO:0048765,GO:0009507,GO:0005634,	0	glabra2 expression modulator
01-30_47-aMSMS-6550.3440.3444.3.pkl	65.38	26	9	0	1	26	80	3	0.009	33.9	--	--	--
01-30_47-aMSMS-6550.3440.3444.3.pkl	90	30	3	0	1	30	551	462	4e-11	58.2	--	--	--
06-30_47-aMSMS-6550.3192.3195.3.pkl	88.24	17	2	0	14	30	679	729	0.038	32.7	--	--	--
01-30_47-aMSMS-6550.3440.3444.3.pkl	53.57	28	13	0	3	30	659	742	6e-04	38.1	GO:0010026,GO:0016192,GO:0005829,GO:0006623,GO:0042732,GO:0010119,GO:0051567,GO:0009637,GO:0016197,GO:0010482,GO:0005515,GO:0048765,GO:0009507,GO:0005634,	0	glabra2 expression modulator
06-30_47-aMSMS-6550.3192.3195.3.pkl	88.24	17	2	0	14	30	346	396	0.038	32.7	--	--	--
01-30_47-aMSMS-6550.3440.3444.3.pkl	61.54	26	10	0	3	28	748	671	3e-04	38.9	GO:0005737,GO:0010286,	0	gem-like protein 5
01-30_47-aMSMS-6550.3440.3444.3.pkl	90	30	3	0	1	30	551	462	5e-11	58.2	--	--	--
01-30_47-aMSMS-6550.3440.3444.3.pkl	60	20	8	0	3	22	587	646	0.086	31.6	GO:0010026,GO:0016192,GO:0005829,GO:0006623,GO:0042732,GO:0010119,GO:0051567,GO:0009637,GO:0016197,GO:0010482,GO:0005515,GO:0048765,GO:0009507,GO:0005634,	0	glabra2 expression modulator
06-30_47-aMSMS-6550.3192.3195.3.pkl	83.33	30	5	0	1	30	627	538	2e-10	56.6	--	--	--
01-30_47-aMSMS-6550.3440.3444.3.pkl	46.43	28	15	0	3	30	768	851	0.008	34.7	GO:0010026,GO:0016192,GO:0005829,GO:0006623,GO:0042732,GO:0010119,GO:0051567,GO:0009637,GO:0016197,GO:0010482,GO:0048765,GO:0009507,GO:0005634,	0	glabra2 expression modulator
01-30_47-aMSMS-6550.3440.3444.3.pkl	76.92	26	6	0	3	28	83	6	2e-07	47.4	--	--	--
06-30_47-aMSMS-6550.3192.3195.3.pkl	88.24	17	2	0	14	30	346	396	0.038	32.7	--	--	--
06-30_47-aMSMS-6550.3192.3195.3.pkl	86.96	23	3	0	8	30	570	502	3e-06	45.1	--	--	--
01-30_47-aMSMS-6550.3440.3444.3.pkl	86.96	23	3	0	8	30	832	764	2e-06	45.4	--	--	--
01-30_47-aMSMS-6550.3440.3444.3.pkl	53.57	28	13	0	3	30	813	896	2e-04	39.7	GO:0010026,GO:0016192,GO:0005829,GO:0006623,GO:0042732,GO:0010119,GO:0051567,GO:0009637,GO:0016197,GO:0010482,GO:0005515,GO:0048765,GO:0009507,GO:0005634,	0	glabra2 expression modulator
01-30_47-aMSMS-6550.3440.3444.3.pkl	55.17	29	13	0	2	30	540	626	5e-05	41.2	GO:0005737,GO:0043231,	0	protein
01-30_47-aMSMS-6550.3440.3444.3.pkl	88.24	17	2	0	14	30	679	729	0.038	32.7	--	--	--
01-30_47-aMSMS-6550.3440.3444.3.pkl	78.57	28	6	0	1	28	545	462	1e-08	51.2	--	--	--
01-30_47-aMSMS-6550.3440.3444.3.pkl	90	30	3	0	1	30	551	462	4e-11	58.2	--	--	--
06-30_47-aMSMS-6550.3192.3195.3.pkl	65.38	26	9	0	1	26	80	3	0.009	33.9	--	--	--
01-30_47-aMSMS-6550.3440.3444.3.pkl	55.17	29	13	0	2	30	540	626	5e-05	41.2	GO:0005737,GO:0043231,	0	protein
06-30_47-aMSMS-6550.3192.3195.3.pkl	88.24	17	2	0	14	30	973	1023	0.04	32.7	--	--	--
01-30_47-aMSMS-6550.3440.3444.3.pkl	61.54	26	10	0	3	28	712	635	2e-04	39.3	GO:0005737,GO:0010286,	0	gem-like protein 5
01-30_47-aMSMS-6550.3440.3444.3.pkl	88.24	17	2	0	14	30	973	1023	0.04	32.7	--	--	--
01-30_47-aMSMS-6550.3440.3444.3.pkl	83.33	30	5	0	1	30	582	671	2e-10	56.6	--	--	--
01-30_47-aMSMS-6550.3440.3444.3.pkl	60	20	8	0	3	22	587	646	0.086	31.6	GO:0010026,GO:0016192,GO:0005829,GO:0006623,GO:0042732,GO:0010119,GO:0051567,GO:0009637,GO:0016197,GO:0010482,GO:0005515,GO:0048765,GO:0009507,GO:0005634,	0	glabra2 expression modulator
01-30_47-aMSMS-6550.3440.3444.3.pkl	53.57	28	13	0	3	30	659	742	6e-04	38.1	GO:0010026,GO:0016192,GO:0005829,GO:0006623,GO:0042732,GO:0010119,GO:0051567,GO:0009637,GO:0016197,GO:0010482,GO:0005515,GO:0048765,GO:0009507,GO:0005634,	0	glabra2 expression modulator
06-30_47-aMSMS-6550.3192.3195.3.pkl	78.57	28	6	0	1	28	545	462	1e-08	51.2	--	--	--
01-30_47-aMSMS-6550.3440.3444.3.pkl	55.17	29	13	0	2	30	507	593	5e-05	41.2	GO:0009536,	0	protein
01-30_47-aMSMS-6550.3440.3444.3.pkl	86.96	23	3	0	8	30	832	764	2e-06	45.4	--	--	--
01-30_47-aMSMS-6550.3440.3444.3.pkl	76.92	26	6	0	3	28	83	6	2e-07	47.4	--	--	--
01-30_47-aMSMS-6550.3440.3444.3.pkl	53.57	28	13	0	3	30	659	742	6e-04	38.1	GO:0010026,GO:0016192,GO:0005829,GO:0006623,GO:0042732,GO:0010119,GO:0051567,GO:0009637,GO:0016197,GO:0010482,GO:0005515,GO:0048765,GO:0009507,GO:0005634,	0	glabra2 expression modulator
01-30_47-aMSMS-6550.3440.3444.3.pkl	46.43	28	15	0	3	30	768	851	0.008	34.7	GO:0010026,GO:0016192,GO:0005829,GO:0006623,GO:0042732,GO:0010119,GO:0051567,GO:0009637,GO:0016197,GO:0010482,GO:0048765,GO:0009507,GO:0005634,	0	glabra2 expression modulator
01-30_47-aMSMS-6550.3440.3444.3.pkl	55.17	29	13	0	2	30	507	593	5e-05	41.2	GO:0009536,	0	protein
01-30_47-aMSMS-6550.3440.3444.3.pkl	57.14	28	12	0	3	30	469	552	1e-04	40	GO:0005737,GO:0010286,	0	gem-like protein 5
01-30_47-aMSMS-6550.3440.3444.3.pkl	88.24	17	2	0	14	30	1091	1141	0.04	32.7	--	--	--
01-30_47-aMSMS-6550.3440.3444.3.pkl	53.57	28	13	0	3	30	875	792	3e-04	38.9	GO:0005737,GO:0010286,	0	protein
01-30_47-aMSMS-6550.3440.3444.3.pkl	86.96	23	3	0	8	30	570	502	3e-06	45.1	--	--	--
01-30_47-aMSMS-6550.3440.3444.3.pkl	53.57	28	13	0	3	30	659	742	6e-04	38.1	GO:0010026,GO:0016192,GO:0005829,GO:0006623,GO:0042732,GO:0010119,GO:0051567,GO:0009637,GO:0016197,GO:0010482,GO:0005515,GO:0048765,GO:0009507,GO:0005634,	0	glabra2 expression modulator
01-30_47-aMSMS-6550.3440.3444.3.pkl	90	30	3	0	1	30	551	462	5e-11	58.2	--	--	--
01-30_47-aMSMS-6550.3440.3444.3.pkl	61.54	26	10	0	3	28	748	671	3e-04	38.9	GO:0005737,GO:0010286,	0	gem-like protein 5
01-30_47-aMSMS-6550.3440.3444.3.pkl	53.57	28	13	0	3	30	875	792	3e-04	38.9	GO:0005737,GO:0010286,	0	protein
01-30_47-aMSMS-6550.3440.3444.3.pkl	88.24	17	2	0	14	30	1091	1141	0.04	32.7	--	--	--
01-30_47-aMSMS-6550.3440.3444.3.pkl	57.14	28	12	0	3	30	469	552	1e-04	40	GO:0005737,GO:0010286,	0	gem-like protein 5

## Sheet: 2 Hours
2 Hours
protein_id	%_identity	alignment_length	mismatches	gap_opens	q._start	q._end	s._start	s._end	e-value	bit_score	GO	EC	Protein name
02-30_47-aMSMS-6550.3298.3303.3.pkl	60.87	23	9	0	1	23	1091	1023	8e-04	37.4	GO:0005886,GO:0006468,GO:0005524,GO:0016021,GO:0004674,GO:0005739,GO:0009069,	EC:2.7.11,	probable lrr receptor-like serine threonine-protein kinase at5g10290-like
02-30_47-aMSMS-6550.3298.3303.3.pkl	39.13	23	14	0	1	23	3619	3687	0.74	28.9	GO:0016021,GO:0006468,GO:0004674,GO:0004888,GO:0009611,GO:0007169,GO:0016491,GO:0005524,GO:0001653,GO:0031347,GO:0005886,	EC:2.7.11,	tyrosine-sulfated glycopeptide receptor 1-like
02-30_47-aMSMS-6550.2565.2565.2.pkl	100	14	0	0	1	14	874	915	0.003	35	GO:0048040,GO:0009750,GO:0009744,GO:0042732,GO:0005886,GO:0009749,GO:0009225,GO:0050662,GO:0005829,	EC:4.1.1.35,	udp-xyl synthase 6
02-30_47-aMSMS-6550.3426.3430.0.pkl	53.85	26	12	0	1	26	860	783	0.1	31.2	GO:0016491,GO:0000166,GO:0055114,GO:0008270,	0	cinnamyl alcohol dehydrogenase-like protein
02-30_47-aMSMS-6550.1970.1973.3.pkl	80	15	3	0	1	15	851	895	0.57	28.9	GO:0048868,GO:0052542,GO:0006012,GO:0035556,GO:0009723,GO:0050373,GO:0009738,GO:0003978,GO:0050662,GO:0009225,GO:0009832,GO:0019567,GO:0005794,GO:0009793,	EC:5.1.3.2,EC:5.1.3.5,	udp-arabinose 4-epimerase
02-30_47-aMSMS-6550.3079.3086.3.pkl	73.91	23	6	0	1	23	1110	1178	7e-04	37.7	GO:0005829,GO:0010498,GO:0030955,GO:0007010,GO:0005524,GO:0004743,GO:0000287,GO:0006096,GO:0016310,GO:0006094,GO:0006865,	EC:2.7.1.40,	pyruvate kinase
02-30_47-aMSMS-6550.0799.0806.2.pkl	100	10	0	0	1	10	142	113	6.3	23.5	GO:0008340,GO:0000003,GO:0043066,GO:0040007,GO:0019901,GO:0006351,GO:0040010,GO:0003746,GO:0040011,GO:0006414,GO:0005525,GO:0006184,GO:0005829,GO:0006355,GO:0043025,GO:0009792,GO:0002119,GO:0005853,GO:0010035,GO:0051260,GO:0003924,GO:0005886,GO:0005634,GO:1900119,GO:0003729,	0	translation elongation factor 1a
02-30_47-aMSMS-6550.2949.2953.3.pkl	85	20	3	0	1	20	777	836	0.001	37	GO:0003677,GO:0046983,GO:0005634,	0	protein dimerization
02-30_47-aMSMS-6550.1786.1790.2.pkl	100	11	0	0	1	11	1507	1539	8.5	25	GO:0001666,GO:0009011,GO:0010264,GO:0009501,GO:0019375,GO:0019252,GO:0033840,GO:0009507,	EC:2.4.1.242,EC:2.4.1.21,	granule-bound starch synthase
02-30_47-aMSMS-6550.3079.3086.3.pkl	92	25	2	0	1	25	1539	1613	7e-07	46.6	GO:0004743,GO:0046686,GO:0005886,GO:0016310,GO:0030955,GO:0000287,GO:0006096,GO:0005829,	EC:2.7.1.40,	pyruvate cytosolic isozyme-like
02-30_47-aMSMS-6550.1970.1973.3.pkl	58.82	17	7	0	1	17	2398	2348	1.2	27.7	GO:0005829,GO:0008831,GO:0010224,GO:0045226,GO:0009506,GO:0050377,GO:0010253,GO:0010280,GO:0009744,GO:0050662,GO:0051555,GO:0009507,GO:0010315,GO:0008460,	EC:4.2.1.46,EC:4.2.1.76,EC:1.1.1.133,	probable rhamnose biosynthetic enzyme 1-like
02-30_47-aMSMS-6550.1970.1973.3.pkl	84.62	13	2	0	1	13	665	703	0.75	28.5	GO:0003978,GO:0019567,GO:0050662,GO:0016021,GO:0052542,GO:0033358,GO:0032580,GO:0009832,GO:0009738,GO:0050373,GO:0009723,GO:0006012,GO:0045227,GO:0035556,	EC:5.1.3.2,EC:5.1.3.5,	udp-arabinose 4-epimerase
02-30_47-aMSMS-6550.2059.2063.4.pkl	94.74	19	1	0	1	19	585	529	1e-04	39.7	GO:0080167,	0	gamma-glutamylcyclotransferase at3g02910-like
02-30_47-aMSMS-6550.1970.1973.3.pkl	58.82	17	7	0	1	17	892	942	1.6	27.3	GO:0008460,GO:0010253,GO:0010489,GO:0009507,GO:0045226,GO:0010214,GO:0009744,GO:0050377,GO:0005829,GO:0051555,GO:0050662,GO:0010224,GO:0010315,GO:0010192,GO:0008831,GO:0010490,GO:0009506,GO:0010280,	EC:4.2.1.46,EC:1.1.1.133,EC:4.2.1.76,	udp-glucose -dehydratase
02-30_47-aMSMS-6550.2379.2383.3.pkl	55.56	18	8	0	1	18	200	253	4.1	26.2	GO:0016621,GO:0019761,GO:0045552,GO:0009809,GO:0050662,GO:0005829,GO:0055114,	EC:1.2.1.44,EC:1.1.1.219,	cinnamoyl- reductase
02-30_47-aMSMS-6550.3298.3303.3.pkl	52.17	23	11	0	1	23	1020	952	0.93	28.5	GO:0010103,GO:0009960,GO:0004871,GO:0006499,GO:0010363,GO:0032440,GO:0006612,GO:0043069,GO:0046777,GO:0007169,GO:0004674,GO:0070825,GO:0009845,GO:0016021,GO:0055114,GO:0008233,GO:0002237,GO:0005886,GO:0005524,GO:0006979,GO:0048443,GO:0009627,	EC:1.3.1.74,EC:2.7.11,	receptor protein kinase clavata1
02-30_47-aMSMS-6550.2565.2565.2.pkl	100	14	0	0	1	14	900	859	0.004	35	GO:0048040,GO:0009750,GO:0009744,GO:0042732,GO:0005886,GO:0009749,GO:0009225,GO:0050662,GO:0005829,	EC:4.1.1.35,	udp-xyl synthase 5
02-30_47-aMSMS-6550.2541.2541.2.pkl	80	15	3	0	1	15	1942	1898	0.009	34.3	GO:0005737,GO:0030170,GO:0006563,GO:0046686,GO:0035999,GO:0032259,GO:0008168,GO:0004372,GO:0006544,	EC:2.1.2.1,	serine hydroxymethyltransferase 1-like
02-30_47-aMSMS-6550.2541.2541.2.pkl	75	16	4	0	1	16	690	737	0.013	33.5	GO:0005829,GO:0006164,GO:0006544,GO:0032259,GO:0035999,GO:0004372,GO:0009570,GO:0006563,GO:0030170,GO:0008168,	EC:2.1.2.1,	serine hydroxymethyltransferase 3
02-30_47-aMSMS-6550.3298.3303.3.pkl	52.17	23	11	0	1	23	2645	2713	1	28.5	GO:0010103,GO:0009960,GO:0006499,GO:0010363,GO:0032440,GO:0006612,GO:0043069,GO:0046777,GO:0007169,GO:0004674,GO:0070825,GO:0009845,GO:0016021,GO:0055114,GO:0008233,GO:0002237,GO:0005886,GO:0005524,GO:0006979,GO:0048443,GO:0009627,	EC:1.3.1.74,EC:2.7.11,	receptor-like protein kinase haiku2
02-30_47-aMSMS-6550.2100.2104.3.pkl	90	10	1	0	4	13	137	108	2.8	24.3	--	--	--
02-30_47-aMSMS-6550.1970.1973.3.pkl	76.92	13	3	0	3	15	1557	1519	3.8	26.2	GO:0045552,GO:0050662,GO:0005829,GO:0080110,GO:0055114,	EC:1.1.1.219,	cinnamoyl- reductase
02-30_47-aMSMS-6550.3079.3086.3.pkl	73.91	23	6	0	1	23	1183	1251	0.005	35	GO:0005829,GO:0010498,GO:0030955,GO:0007010,GO:0005524,GO:0004743,GO:0000287,GO:0006096,GO:0016310,GO:0006094,GO:0006865,	EC:2.7.1.40,	pyruvate kinase
02-30_47-aMSMS-6550.3298.3303.3.pkl	47.83	23	12	0	1	23	3353	3421	0.83	28.5	GO:0031348,GO:0004721,GO:0009595,GO:0009867,GO:0009862,GO:0016023,GO:0010363,GO:0010310,GO:0002679,GO:0010200,GO:0006612,GO:0050832,GO:0042742,GO:0043069,GO:0007169,GO:0006468,GO:0004674,GO:0000165,GO:0016021,GO:0052542,GO:0005886,GO:0030968,GO:0005524,GO:0009581,GO:0005739,	EC:3.1.3.16,EC:2.7.11,	probable lrr receptor-like serine threonine-protein kinase at1g74360-like
02-30_47-aMSMS-6550.1970.1973.3.pkl	84.62	13	2	0	1	13	1355	1317	0.64	28.5	GO:0009684,GO:0050379,GO:0050378,GO:0005975,GO:0005768,GO:0005515,GO:0006569,GO:0005802,GO:0050662,GO:0009225,GO:0005794,	EC:5.1.3.12,EC:5.1.3.6,	udp-d-glucuronic acid 4-epimerase
02-30_47-aMSMS-6550.1970.1973.3.pkl	86.67	15	2	0	1	15	365	409	0.074	31.6	GO:0005829,GO:0033358,GO:0050373,GO:0045227,GO:0009555,GO:0046983,GO:0003978,GO:0050662,GO:0005794,GO:0005886,GO:0046369,	EC:5.1.3.2,EC:5.1.3.5,	udp-glucose 4-epimerase
02-30_47-aMSMS-6550.3426.3430.0.pkl	56	25	11	0	2	26	647	573	0.017	33.5	GO:0046685,GO:0042344,GO:0015700,GO:0009697,GO:0048037,GO:0005507,GO:0010363,GO:0010200,GO:0034976,GO:0031348,GO:0046870,GO:0050832,GO:0043069,GO:0005829,GO:0009867,GO:0019684,GO:0009626,GO:0009595,GO:0042742,GO:0006612,GO:0046482,GO:0010310,GO:0071992,GO:0046938,GO:0016756,GO:0052544,GO:0008270,GO:0009862,GO:0015446,GO:0010337,GO:0046029,GO:0046686,GO:0009409,GO:0009809,GO:0000165,GO:0006635,GO:…	EC:1.1.1.255,EC:2.3.2.15,EC:3.6.3.16,	cinnamyl alcohol dehydrogenase
02-30_47-aMSMS-6550.3298.3303.3.pkl	52.17	23	11	0	1	23	3121	3189	0.32	30	GO:0048653,GO:0009414,GO:0016023,GO:0048508,GO:0009846,GO:0010152,GO:0007169,GO:0006468,GO:0004674,GO:0016021,GO:0009808,GO:0009409,GO:0051260,GO:0009945,GO:0005886,GO:0010073,GO:0005524,GO:0009942,GO:0005739,	EC:2.7.11,	leucine rich repeat receptor protein kinase 2
02-30_47-aMSMS-6550.3079.3086.3.pkl	92	25	2	0	1	25	1331	1405	1e-06	46.2	GO:0004743,GO:0016310,GO:0030955,GO:0000287,GO:0006096,	EC:2.7.1.40,	pyruvate cytosolic isozyme-like
02-30_47-aMSMS-6550.2379.2383.3.pkl	70.59	17	5	0	1	17	217	267	0.27	30	GO:0006468,GO:0009553,GO:0080008,GO:0016905,GO:0051604,GO:0004713,GO:0005524,GO:0042254,GO:0005634,	EC:2.7.11.7,EC:2.7.10,	notchless protein homolog
02-30_47-aMSMS-6550.3298.3303.3.pkl	47.83	23	12	0	1	23	1015	947	0.46	29.3	GO:0005829,GO:0016021,GO:0006468,GO:0009506,GO:0005524,GO:0000186,GO:0004709,GO:0005576,GO:0005794,GO:0005886,GO:0000165,	EC:2.7.11.25,EC:2.7.11,	receptor-like kinase
02-30_47-aMSMS-6550.2541.2541.2.pkl	66.67	15	5	0	1	15	1091	1135	0.2	30	GO:0030170,GO:0006563,GO:0009055,GO:0020037,GO:0035999,GO:0032259,GO:0008168,GO:0004372,GO:0006544,	EC:2.1.2.1,	serine hydroxymethyltransferase
02-30_47-aMSMS-6550.3298.3303.3.pkl	47.83	23	12	0	1	23	2044	1976	0.37	29.6	GO:0016491,GO:0016310,GO:0004672,GO:0016020,GO:0000166,	0	receptor-like protein kinase hsl1-like
02-30_47-aMSMS-6550.3298.3303.3.pkl	43.48	23	13	0	1	23	3004	3072	1.1	28.1	GO:0048767,GO:0042803,GO:0000271,GO:0043481,GO:0005496,GO:0009825,GO:0016021,GO:0000186,GO:1900140,GO:0043234,GO:0010584,GO:0048657,GO:0009911,GO:0009729,GO:0010817,GO:0042742,GO:0004709,GO:0010224,GO:0005886,GO:0002237,GO:0048366,GO:0010268,GO:0005524,GO:0060548,GO:0046982,GO:0004721,GO:0009932,GO:0009742,GO:0000165,GO:0006468,GO:0005768,GO:0010103,GO:0071555,	EC:2.7.11.25,EC:3.1.3.16,EC:2.7.11,	brassinosteroid receptor
02-30_47-aMSMS-6550.2565.2565.2.pkl	76.92	13	3	0	1	13	704	666	4.4	25.8	GO:0005768,GO:0048040,GO:0042732,GO:0005794,GO:0005886,GO:0009225,GO:0050662,GO:0005802,	EC:4.1.1.35,	udp-glucuronic acid decarboxylase 1
02-30_47-aMSMS-6550.1970.1973.3.pkl	84.62	13	2	0	1	13	665	703	0.75	28.5	GO:0003978,GO:0019567,GO:0050662,GO:0016021,GO:0052542,GO:0033358,GO:0032580,GO:0009832,GO:0009738,GO:0050373,GO:0009723,GO:0006012,GO:0045227,GO:0035556,	EC:5.1.3.2,EC:5.1.3.5,	udp-arabinose 4-epimerase
02-30_47-aMSMS-6550.2565.2565.2.pkl	100	14	0	0	1	14	900	859	0.004	35	GO:0048040,GO:0009750,GO:0009744,GO:0042732,GO:0005886,GO:0009749,GO:0009225,GO:0050662,GO:0005829,	EC:4.1.1.35,	udp-xyl synthase 5
02-30_47-aMSMS-6550.3426.3430.0.pkl	56	25	11	0	2	26	647	573	0.017	33.5	GO:0046685,GO:0042344,GO:0015700,GO:0009697,GO:0048037,GO:0005507,GO:0010363,GO:0010200,GO:0034976,GO:0031348,GO:0046870,GO:0050832,GO:0043069,GO:0005829,GO:0009867,GO:0019684,GO:0009626,GO:0009595,GO:0042742,GO:0006612,GO:0046482,GO:0010310,GO:0071992,GO:0046938,GO:0016756,GO:0052544,GO:0008270,GO:0009862,GO:0015446,GO:0010337,GO:0046029,GO:0046686,GO:0009409,GO:0009809,GO:0000165,GO:0006635,GO:…	EC:1.1.1.255,EC:2.3.2.15,EC:3.6.3.16,	cinnamyl alcohol dehydrogenase
02-30_47-aMSMS-6550.3298.3303.3.pkl	39.13	23	14	0	1	23	3784	3852	0.88	28.5	GO:0016021,GO:0006468,GO:0004674,GO:0004888,GO:0009611,GO:0007169,GO:0016491,GO:0005524,GO:0001653,GO:0031347,GO:0005886,	EC:2.7.11,	tyrosine-sulfated glycopeptide receptor 1-like
02-30_47-aMSMS-6550.3298.3303.3.pkl	52.17	23	11	0	1	23	3014	3082	0.19	30.4	GO:0048653,GO:0009414,GO:0016023,GO:0048508,GO:0009846,GO:0010152,GO:0007169,GO:0006468,GO:0004674,GO:0016021,GO:0009808,GO:0009409,GO:0051260,GO:0009945,GO:0005886,GO:0010073,GO:0005524,GO:0009942,GO:0005739,	EC:2.7.11,	leucine rich repeat receptor protein kinase 2
02-30_47-aMSMS-6550.1985.1988.2.pkl	66.67	15	5	0	1	15	1563	1607	4.4	26.2	GO:0009695,GO:0031408,GO:0034440,GO:0016165,GO:0009611,GO:0005886,GO:0005506,GO:0040007,GO:0009507,	EC:1.13.11.12,	protein
02-30_47-aMSMS-6550.1970.1973.3.pkl	90.91	11	1	0	3	13	398	430	4.9	25.8	GO:0016036,GO:0050378,GO:0005802,GO:0019375,GO:0005515,GO:0042631,GO:0050379,GO:0009225,GO:0005794,GO:0005975,GO:0050662,GO:0006569,GO:0005768,GO:0009684,	EC:5.1.3.12,EC:5.1.3.6,	udp-d-glucuronic acid 4-epimerase
02-30_47-aMSMS-6550.3298.3303.3.pkl	47.83	23	12	0	1	23	3265	3333	0.6	28.9	GO:0010103,GO:0000186,GO:0032440,GO:0007169,GO:0006468,GO:0000165,GO:0006486,GO:0016021,GO:0004709,GO:0055114,GO:0002237,GO:0005886,GO:0005524,GO:0048443,	EC:2.7.11.25,EC:1.3.1.74,EC:2.7.11,	protein
02-30_47-aMSMS-6550.1868.1868.3.pkl	85	20	3	0	1	20	612	553	1e-04	38.9	GO:0006598,GO:0005829,GO:0009805,GO:0046872,GO:0009611,GO:0032259,GO:0009963,GO:0042398,GO:0009809,GO:0042409,GO:0046686,GO:0019344,GO:0005634,	EC:2.1.1.104,	caffeoyl- 3-o-methyltransferase
02-30_47-aMSMS-6550.3298.3303.3.pkl	56.52	23	10	0	1	23	966	898	0.034	32.7	GO:0010103,GO:0009960,GO:0006499,GO:0010363,GO:0032440,GO:0006612,GO:0043069,GO:0046777,GO:0007169,GO:0004674,GO:0070825,GO:0009845,GO:0016021,GO:0004714,GO:0055114,GO:0008233,GO:0002237,GO:0005886,GO:0005524,GO:0006979,GO:0048443,GO:0009627,	EC:2.7.10.1,EC:1.3.1.74,EC:2.7.11,	receptor-like protein kinase haiku2
02-30_47-aMSMS-6550.1970.1973.3.pkl	64.29	14	5	0	1	14	287	328	8.9	25	GO:0016021,GO:0008270,GO:0048364,GO:0005739,GO:0010264,GO:0051301,GO:0004842,GO:0016567,GO:0050662,GO:0005886,	EC:6.3.2.19,	nad dependent epimerase dehydratase family protein
02-30_47-aMSMS-6550.2565.2565.2.pkl	100	14	0	0	1	14	1220	1261	0.004	35	GO:0048040,GO:0009750,GO:0009744,GO:0042732,GO:0005886,GO:0009749,GO:0009225,GO:0050662,GO:0005829,	EC:4.1.1.35,	udp-xyl synthase 6
02-30_47-aMSMS-6550.1970.1973.3.pkl	88.24	17	2	0	1	17	1933	1883	0.002	36.2	GO:0005768,GO:0048040,GO:0042732,GO:0005794,GO:0005886,GO:0009225,GO:0050662,GO:0005802,	EC:4.1.1.35,	udp-glucuronic acid decarboxylase 1
02-30_47-aMSMS-6550.3079.3086.3.pkl	56.52	23	10	0	1	23	861	793	1.5	27.7	GO:0005829,GO:0006633,GO:0030955,GO:0010431,GO:0005739,GO:0004743,GO:0000287,GO:0006096,GO:0016310,GO:0009570,GO:0046686,	EC:2.7.1.40,	pyruvate kinase
02-30_47-aMSMS-6550.3079.3086.3.pkl	63.16	19	7	0	5	23	847	791	0.33	29.6	GO:0005829,GO:0030955,GO:0005524,GO:0004743,GO:0000023,GO:0019252,GO:0000287,GO:0006096,GO:0016310,GO:0046686,GO:0019761,GO:0043085,GO:0005886,	EC:2.7.1.40,	pyruvate kinase
02-30_47-aMSMS-6550.3426.3430.0.pkl	57.69	26	11	0	1	26	989	1066	0.095	31.6	GO:0046029,GO:0000166,GO:0055114,GO:0008270,	EC:1.1.1.255,	cinnamyl alcohol dehydrogenase-like protein
02-30_47-aMSMS-6550.1868.1868.3.pkl	84.21	19	3	0	2	20	979	923	0.001	37	GO:0042409,GO:0003676,GO:0032259,GO:0005829,GO:0015074,	EC:2.1.1.104,	caffeoyl- o-methyltransferase
02-30_47-aMSMS-6550.2565.2565.2.pkl	100	14	0	0	1	14	900	859	0.004	35	GO:0048040,GO:0009750,GO:0009744,GO:0042732,GO:0005886,GO:0009749,GO:0009225,GO:0050662,GO:0005829,	EC:4.1.1.35,	udp-xyl synthase 5
02-30_47-aMSMS-6550.1970.1973.3.pkl	58.82	17	7	0	1	17	2398	2348	1.2	27.7	GO:0005829,GO:0008831,GO:0010224,GO:0045226,GO:0009506,GO:0050377,GO:0010253,GO:0010280,GO:0009744,GO:0050662,GO:0051555,GO:0009507,GO:0010315,GO:0008460,	EC:4.2.1.46,EC:4.2.1.76,EC:1.1.1.133,	probable rhamnose biosynthetic enzyme 1-like
02-30_47-aMSMS-6550.1970.1973.3.pkl	71.43	14	4	0	1	14	1429	1388	0.79	28.1	GO:0050379,GO:0005768,GO:0005975,GO:0005794,GO:0009225,GO:0050662,GO:0050378,GO:0005802,	EC:5.1.3.12,EC:5.1.3.6,	protein
02-30_47-aMSMS-6550.1868.1868.3.pkl	100	11	0	0	10	20	1	33	0.77	26.2	--	--	--
02-30_47-aMSMS-6550.1970.1973.3.pkl	82.35	17	3	0	1	17	1841	1791	0.007	34.3	GO:0005829,GO:0048040,GO:0000139,GO:0042732,GO:0019305,GO:0005768,GO:0005774,GO:0005802,GO:0050662,GO:0005886,GO:0008460,	EC:4.2.1.46,EC:4.1.1.35,	udp-glucuronic acid decarboxylase 1-like
02-30_47-aMSMS-6550.2541.2541.2.pkl	68.75	16	5	0	1	16	429	476	0.11	30.8	GO:0019684,GO:0006563,GO:0009750,GO:0009853,GO:0009749,GO:0048046,GO:0005515,GO:0008270,GO:0010319,GO:0009697,GO:0004372,GO:0022626,GO:0008168,GO:0005759,GO:0042742,GO:0035999,GO:0009744,GO:0050897,GO:0005747,GO:0009570,GO:0030170,GO:0009814,GO:0032259,GO:0046686,GO:0009416,GO:0009409,GO:0009626,GO:0009534,GO:0005886,GO:0008266,GO:0005634,GO:0019464,GO:0007623,	EC:2.1.2.1,	serine hydroxymethyltransferase 2
02-30_47-aMSMS-6550.3298.3303.3.pkl	50	22	11	0	1	22	843	778	1.1	28.1	GO:0006468,GO:0005524,GO:0032440,GO:0016021,GO:0004674,GO:0005739,GO:0055114,	EC:1.3.1.74,EC:2.7.11,	serine-threonine protein plant-
02-30_47-aMSMS-6550.1970.1973.3.pkl	80	15	3	0	1	15	851	895	0.53	28.5	GO:0048868,GO:0052542,GO:0006012,GO:0035556,GO:0009723,GO:0050373,GO:0009738,GO:0003978,GO:0050662,GO:0009225,GO:0009832,GO:0019567,GO:0005794,GO:0009793,	EC:5.1.3.2,EC:5.1.3.5,	udp-arabinose 4-epimerase
02-30_47-aMSMS-6550.2565.2565.2.pkl	100	14	0	0	1	14	1241	1282	0.004	35	GO:0048040,GO:0009750,GO:0009744,GO:0042732,GO:0005886,GO:0009749,GO:0009225,GO:0050662,GO:0005829,	EC:4.1.1.35,	udp-xyl synthase 6
02-30_47-aMSMS-6550.2565.2565.2.pkl	100	13	0	0	1	13	596	558	0.019	32.7	GO:0044237,GO:0048040,GO:0050662,	EC:4.1.1.35,	udp-glucuronic acid decarboxylase 1
02-30_47-aMSMS-6550.3426.3430.0.pkl	57.69	26	11	0	1	26	4220	4143	0.095	31.6	GO:0031047,GO:0000226,GO:0000911,GO:0051567,GO:0048453,GO:0006342,GO:0005737,GO:0005874,GO:0003777,GO:0008017,GO:0006306,GO:0048451,GO:0016572,GO:0009909,GO:0007018,GO:0005871,GO:0005524,	0	di-glucose binding protein with kinesin motor domain
02-30_47-aMSMS-6550.2236.2236.2.pkl	100	10	0	0	1	10	901	872	4	25.8	GO:0034976,GO:0005509,GO:0005739,GO:0006457,GO:0009651,GO:0009408,GO:0009627,GO:0005788,GO:0051082,GO:0009507,GO:0005773,GO:0009644,GO:0042542,GO:0005794,GO:0048046,	0	calreticulin
02-30_47-aMSMS-6550.3079.3086.3.pkl	92	25	2	0	1	25	1331	1405	1e-06	46.2	GO:0004743,GO:0016310,GO:0030955,GO:0000287,GO:0006096,	EC:2.7.1.40,	pyruvate cytosolic isozyme-like
02-30_47-aMSMS-6550.3426.3430.0.pkl	50	26	13	0	1	26	111	34	1	27.7	GO:0046029,GO:0000166,GO:0055114,GO:0008270,	EC:1.1.1.255,	probable mannitol dehydrogenase-like
02-30_47-aMSMS-6550.1970.1973.3.pkl	58.82	17	7	0	1	17	2785	2735	1.6	27.3	GO:0008460,GO:0010253,GO:0010489,GO:0009507,GO:0045226,GO:0010214,GO:0009744,GO:0050377,GO:0005829,GO:0051555,GO:0050662,GO:0010224,GO:0010315,GO:0010192,GO:0008831,GO:0010490,GO:0009506,GO:0010280,	EC:4.2.1.46,EC:1.1.1.133,EC:4.2.1.76,	udp-glucose -dehydratase
02-30_47-aMSMS-6550.1970.1973.3.pkl	64.29	14	5	0	1	14	287	328	8.9	25	GO:0016021,GO:0008270,GO:0048364,GO:0005739,GO:0010264,GO:0051301,GO:0004842,GO:0016567,GO:0050662,GO:0005886,	EC:6.3.2.19,	nad dependent epimerase dehydratase family protein
02-30_47-aMSMS-6550.1970.1973.3.pkl	71.43	14	4	0	1	14	449	490	3.8	26.2	GO:0050378,GO:0005975,GO:0005768,GO:0019375,GO:0042631,GO:0005802,GO:0050662,GO:0009225,GO:0016036,GO:0016020,GO:0005794,	EC:5.1.3.6,	nucleotide sugar epimerase
02-30_47-aMSMS-6550.3298.3303.3.pkl	43.48	23	13	0	1	23	1327	1259	0.95	28.5	GO:0042803,GO:0005496,GO:0016021,GO:0000186,GO:1900140,GO:0043234,GO:0010584,GO:0006952,GO:0048657,GO:0009911,GO:0009729,GO:0008544,GO:0004709,GO:0010224,GO:0005886,GO:0048366,GO:0010268,GO:0005524,GO:0009826,GO:0060548,GO:0046982,GO:0004721,GO:0009742,GO:0000165,GO:0006468,GO:0005768,GO:0009617,	EC:2.7.11.25,EC:3.1.3.16,EC:2.7.11,	brassinosteroid receptor
02-30_47-aMSMS-6550.3298.3303.3.pkl	47.83	23	12	0	1	23	2503	2571	0.92	28.5	GO:0016021,GO:0006468,GO:0005524,GO:0000186,GO:0004709,GO:0000165,	EC:2.7.11.25,EC:2.7.11,	receptor-like protein kinase
02-30_47-aMSMS-6550.3079.3086.3.pkl	52.17	23	11	0	1	23	917	849	2.3	27.3	GO:0006633,GO:0030955,GO:0010431,GO:0005739,GO:0005524,GO:0004743,GO:0000287,GO:0006096,GO:0016310,GO:0009570,GO:0046686,	EC:2.7.1.40,	pyruvate kinase isozyme chloroplastic-like
02-30_47-aMSMS-6550.3298.3303.3.pkl	43.48	23	13	0	1	23	3907	3975	0.33	29.6	GO:0010103,GO:0004721,GO:0005515,GO:0016023,GO:0009691,GO:0043090,GO:0006468,GO:0004674,GO:0007165,GO:0006888,GO:0016021,GO:0002237,GO:0005886,GO:0005524,GO:0048443,	EC:3.1.3.16,EC:2.7.11,	serine threonine-protein kinase bri1-like 1
02-30_47-aMSMS-6550.1970.1973.3.pkl	64.29	14	5	0	1	14	786	827	2.6	26.6	GO:0005975,GO:0005794,GO:0009225,GO:0050662,GO:0016020,GO:0050378,	EC:5.1.3.6,	udp-d-glucuronate 4-epimerase 2
02-30_47-aMSMS-6550.2379.2383.3.pkl	70.59	17	5	0	1	17	217	267	0.27	30	GO:0006468,GO:0009553,GO:0080008,GO:0016905,GO:0051604,GO:0004713,GO:0005524,GO:0042254,GO:0005634,	EC:2.7.11.7,EC:2.7.10,	notchless protein homolog
02-30_47-aMSMS-6550.1970.1973.3.pkl	64.29	14	5	0	1	14	786	827	2.6	26.6	GO:0005975,GO:0005794,GO:0009225,GO:0050662,GO:0016020,GO:0050378,	EC:5.1.3.6,	udp-d-glucuronate 4-epimerase 2
02-30_47-aMSMS-6550.1970.1973.3.pkl	71.43	14	4	0	1	14	2153	2112	0.82	28.1	GO:0050379,GO:0005768,GO:0005975,GO:0005794,GO:0009225,GO:0050662,GO:0050378,GO:0005802,	EC:5.1.3.12,EC:5.1.3.6,	protein
02-30_47-aMSMS-6550.3079.3086.3.pkl	92	25	2	0	1	25	1681	1755	8e-07	46.6	GO:0004743,GO:0046686,GO:0016310,GO:0030955,GO:0000287,GO:0006096,GO:0016020,GO:0005829,	EC:2.7.1.40,	pyruvate cytosolic isozyme-like
02-30_47-aMSMS-6550.3298.3303.3.pkl	47.83	23	12	0	1	23	2531	2599	0.63	28.9	GO:0016021,GO:0006468,GO:0005524,GO:0000186,GO:0004709,GO:0000165,	EC:2.7.11.25,EC:2.7.11,	receptor-like protein kinase
02-30_47-aMSMS-6550.1868.1868.3.pkl	100	20	0	0	1	20	158	217	9e-06	42.4	GO:0042409,GO:0046872,GO:0009809,GO:0032259,	EC:2.1.1.104,	caffeoyl- 3-o-methyltransferase
02-30_47-aMSMS-6550.1970.1973.3.pkl	84.62	13	2	0	1	13	1542	1504	0.79	28.1	GO:0003978,GO:0019567,GO:0050662,GO:0016021,GO:0052542,GO:0033358,GO:0032580,GO:0009832,GO:0009738,GO:0050373,GO:0009723,GO:0006012,GO:0045227,GO:0035556,	EC:5.1.3.2,EC:5.1.3.5,	udp-arabinose 4-epimerase
02-30_47-aMSMS-6550.3298.3303.3.pkl	60.87	23	9	0	1	23	2241	2309	0.002	36.2	GO:0016021,GO:0006468,GO:0004674,GO:0010075,GO:0016023,GO:0005524,GO:0048653,GO:0007020,GO:0005576,GO:0004715,GO:0005886,	EC:2.7.10.2,EC:2.7.11,	leucine-rich repeat receptor-like kinase
02-30_47-aMSMS-6550.2949.2953.3.pkl	85	20	3	0	1	20	777	836	0.001	37	GO:0003677,GO:0046983,GO:0005634,	0	protein dimerization
02-30_47-aMSMS-6550.2379.2383.3.pkl	55.56	18	8	0	1	18	200	253	4.1	26.2	GO:0016621,GO:0019761,GO:0045552,GO:0009809,GO:0050662,GO:0005829,GO:0055114,	EC:1.2.1.44,EC:1.1.1.219,	cinnamoyl- reductase
02-30_47-aMSMS-6550.3298.3303.3.pkl	47.83	23	12	0	1	23	3079	3011	0.37	29.6	GO:0016491,GO:0016310,GO:0004672,GO:0016020,GO:0000166,	0	receptor-like protein kinase hsl1-like
02-30_47-aMSMS-6550.2541.2541.2.pkl	66.67	15	5	0	1	15	1056	1100	0.35	29.3	GO:0005737,GO:0030170,GO:0006563,GO:0046686,GO:0009055,GO:0020037,GO:0035999,GO:0032259,GO:0008168,GO:0004372,GO:0006544,	EC:2.1.2.1,	serine hydroxymethyltransferase
02-30_47-aMSMS-6550.2541.2541.2.pkl	68.75	16	5	0	1	16	447	400	0.086	31.2	GO:0019684,GO:0006563,GO:0009750,GO:0009853,GO:0009749,GO:0048046,GO:0005515,GO:0008270,GO:0010319,GO:0009697,GO:0004372,GO:0022626,GO:0008168,GO:0005759,GO:0042742,GO:0035999,GO:0009744,GO:0050897,GO:0005747,GO:0009570,GO:0030170,GO:0009814,GO:0032259,GO:0046686,GO:0009416,GO:0009409,GO:0009626,GO:0009534,GO:0005886,GO:0008266,GO:0005634,GO:0019464,GO:0007623,	EC:2.1.2.1,	serine hydroxymethyltransferase
02-30_47-aMSMS-6550.1376.1381.2.pkl	100	10	0	0	1	10	57	86	1.2	25.4	GO:0005874,GO:0051258,GO:0006184,GO:0007017,GO:0003924,GO:0005200,GO:0005737,GO:0005525,	0	tbb3_aneph ame: full=tubulin beta-3 chain ame: full=beta-3-tubulin
02-30_47-aMSMS-6550.3426.3430.0.pkl	57.69	26	11	0	1	26	4220	4143	0.094	31.6	GO:0031047,GO:0000226,GO:0000911,GO:0051567,GO:0048453,GO:0006342,GO:0005737,GO:0005874,GO:0003777,GO:0008017,GO:0006306,GO:0048451,GO:0016572,GO:0009909,GO:0007018,GO:0005871,GO:0005524,	0	di-glucose binding protein with kinesin motor domain
02-30_47-aMSMS-6550.3079.3086.3.pkl	92	25	2	0	1	25	1213	1287	8e-07	46.6	GO:0004743,GO:0046686,GO:0005886,GO:0016310,GO:0030955,GO:0000287,GO:0006096,GO:0005829,	EC:2.7.1.40,	pyruvate cytosolic isozyme-like
02-30_47-aMSMS-6550.2379.2383.3.pkl	64.71	17	6	0	1	17	289	339	2.7	25.8	GO:0045551,GO:0052747,GO:0003964,GO:0048868,GO:0006278,GO:0003723,GO:0045552,GO:0004022,GO:0050662,GO:0048610,GO:0055114,	EC:2.7.7.49,EC:1.1.1.195,EC:1.1.1.1,EC:1.1.1.219,	cinnamyl alcohol dehydrogenase
02-30_47-aMSMS-6550.3079.3086.3.pkl	92	25	2	0	1	25	1331	1405	1e-06	46.2	GO:0004743,GO:0016310,GO:0030955,GO:0000287,GO:0006096,	EC:2.7.1.40,	pyruvate cytosolic isozyme-like
02-30_47-aMSMS-6550.1970.1973.3.pkl	64.29	14	5	0	1	14	287	328	8.9	25	GO:0016021,GO:0008270,GO:0048364,GO:0005739,GO:0010264,GO:0051301,GO:0004842,GO:0016567,GO:0050662,GO:0005886,	EC:6.3.2.19,	nad dependent epimerase dehydratase family protein
02-30_47-aMSMS-6550.3426.3430.0.pkl	57.69	26	11	0	1	26	2349	2426	0.088	31.6	GO:0046029,GO:0055114,GO:0008270,	EC:1.1.1.255,	cinnamyl alcohol dehydrogenase-like protein
02-30_47-aMSMS-6550.3079.3086.3.pkl	52.17	23	11	0	1	23	1599	1667	2.9	26.9	GO:0006633,GO:0030955,GO:0010431,GO:0005739,GO:0005524,GO:0004743,GO:0000287,GO:0006096,GO:0016310,GO:0009570,GO:0046686,	EC:2.7.1.40,	pyruvate kinase isozyme chloroplastic-like
02-30_47-aMSMS-6550.2100.2104.3.pkl	75	12	3	0	2	13	73	38	2.9	24.3	--	--	--
02-30_47-aMSMS-6550.3426.3430.0.pkl	57.69	26	11	0	1	26	4220	4143	0.094	31.6	GO:0031047,GO:0000226,GO:0000911,GO:0051567,GO:0048453,GO:0006342,GO:0005737,GO:0005874,GO:0003777,GO:0008017,GO:0006306,GO:0048451,GO:0016572,GO:0009909,GO:0007018,GO:0005871,GO:0005524,	0	di-glucose binding protein with kinesin motor domain
02-30_47-aMSMS-6550.3298.3303.3.pkl	43.48	23	13	0	1	23	3907	3975	0.33	29.6	GO:0010103,GO:0004721,GO:0005515,GO:0016023,GO:0009691,GO:0043090,GO:0006468,GO:0004674,GO:0007165,GO:0006888,GO:0016021,GO:0002237,GO:0005886,GO:0005524,GO:0048443,	EC:3.1.3.16,EC:2.7.11,	serine threonine-protein kinase bri1-like 1
02-30_47-aMSMS-6550.2211.2211.3.pkl	100	11	0	0	1	11	499	531	3.3	25.4	GO:0048767,GO:0006833,GO:0005525,GO:0000271,GO:0043481,GO:0009825,GO:0007018,GO:0007010,GO:0019344,GO:0016126,GO:0005200,GO:0006096,GO:0009651,GO:0009740,GO:0010498,GO:0010162,GO:0005886,GO:0005737,GO:0006084,GO:0051258,GO:0016132,GO:0005874,GO:0006972,GO:0003924,GO:0046686,GO:0009409,GO:0009932,GO:0007030,GO:0006184,GO:0006094,GO:0071555,	0	tubulin-like protein
02-30_47-aMSMS-6550.3426.3430.0.pkl	100	26	0	0	1	26	490	413	2e-10	56.2	GO:0045551,GO:0052747,GO:0009809,GO:0008270,GO:0055114,	EC:1.1.1.195,	cinnamyl alcohol dehydrogenase
02-30_47-aMSMS-6550.3298.3303.3.pkl	60.87	23	9	0	1	23	1091	1023	8e-04	37.4	GO:0005886,GO:0006468,GO:0005524,GO:0016021,GO:0004674,GO:0005739,GO:0009069,	EC:2.7.11,	probable lrr receptor-like serine threonine-protein kinase at5g10290-like
02-30_47-aMSMS-6550.1970.1973.3.pkl	86.67	15	2	0	1	15	365	409	0.067	31.6	GO:0005829,GO:0033358,GO:0050373,GO:0045227,GO:0009555,GO:0046983,GO:0003978,GO:0050662,GO:0005794,GO:0005886,GO:0046369,	EC:5.1.3.2,EC:5.1.3.5,	udp-glucose 4-epimerase
02-30_47-aMSMS-6550.3426.3430.0.pkl	100	26	0	0	1	26	574	651	1e-10	57	GO:0045551,GO:0052747,GO:0009809,GO:0008270,GO:0055114,	EC:1.1.1.195,	cinnamyl alcohol dehydrogenase
02-30_47-aMSMS-6550.3298.3303.3.pkl	47.62	21	11	0	3	23	3	65	0.69	28.9	GO:0010363,GO:0002679,GO:0010200,GO:0002229,GO:0032440,GO:0006612,GO:0050832,GO:0042742,GO:0043069,GO:0046982,GO:0006468,GO:0004674,GO:0043234,GO:0009742,GO:0016021,GO:0008219,GO:0004714,GO:0005768,GO:0055114,GO:0016049,GO:0033612,GO:0009863,GO:0005886,GO:0030968,GO:0005524,	EC:2.7.10.1,EC:1.3.1.74,EC:2.7.11,	brassinosteroid insensitive 1-associated receptor kinase 1
02-30_47-aMSMS-6550.1786.1790.2.pkl	100	11	0	0	1	11	1078	1046	8.3	25	GO:0001666,GO:0009011,GO:0010264,GO:0009501,GO:0019375,GO:0019252,GO:0033840,GO:0009507,	EC:2.4.1.242,EC:2.4.1.21,	granule-bound starch synthase
02-30_47-aMSMS-6550.1970.1973.3.pkl	82.35	17	3	0	1	17	1830	1780	0.006	34.7	GO:0005829,GO:0048040,GO:0000139,GO:0042732,GO:0019305,GO:0005768,GO:0005774,GO:0005802,GO:0050662,GO:0005886,GO:0008460,	EC:4.2.1.46,EC:4.1.1.35,	udp-glucuronic acid decarboxylase 1-like
02-30_47-aMSMS-6550.3298.3303.3.pkl	39.13	23	14	0	1	23	3619	3687	0.74	28.9	GO:0016021,GO:0006468,GO:0004674,GO:0004888,GO:0009611,GO:0007169,GO:0016491,GO:0005524,GO:0001653,GO:0031347,GO:0005886,	EC:2.7.11,	tyrosine-sulfated glycopeptide receptor 1-like
02-30_47-aMSMS-6550.1970.1973.3.pkl	90.91	11	1	0	3	13	666	698	5	25.8	GO:0005975,GO:0005794,GO:0009225,GO:0050662,GO:0016020,GO:0050378,	EC:5.1.3.6,	udp-d-glucuronate 4-epimerase 2
02-30_47-aMSMS-6550.1764.1764.2.pkl	100	18	0	0	1	18	956	1009	4e-04	37.7	GO:0004001,GO:0006166,GO:0016773,GO:0006167,GO:0016310,	EC:2.7.1.20,	adenosine kinase
02-30_47-aMSMS-6550.2541.2541.2.pkl	75	16	4	0	1	16	690	737	0.013	33.5	GO:0005829,GO:0006164,GO:0006544,GO:0032259,GO:0035999,GO:0004372,GO:0009570,GO:0006563,GO:0030170,GO:0008168,	EC:2.1.2.1,	serine hydroxymethyltransferase 3
02-30_47-aMSMS-6550.2565.2565.2.pkl	100	13	0	0	1	13	596	558	0.022	32.7	GO:0044237,GO:0048040,GO:0050662,	EC:4.1.1.35,	udp-glucuronic acid decarboxylase 1
02-30_47-aMSMS-6550.1970.1973.3.pkl	80	15	3	0	1	15	851	895	0.57	28.9	GO:0052542,GO:0006012,GO:0035556,GO:0009723,GO:0050373,GO:0009738,GO:0003978,GO:0050662,GO:0009225,GO:0009832,GO:0019567,GO:0005794,GO:0006865,	EC:5.1.3.2,EC:5.1.3.5,	udp-arabinose 4-epimerase
02-30_47-aMSMS-6550.3298.3303.3.pkl	47.83	23	12	0	1	23	3353	3421	0.83	28.5	GO:0031348,GO:0004721,GO:0009595,GO:0009867,GO:0009862,GO:0016023,GO:0010363,GO:0010310,GO:0002679,GO:0010200,GO:0006612,GO:0050832,GO:0042742,GO:0043069,GO:0007169,GO:0006468,GO:0004674,GO:0000165,GO:0016021,GO:0052542,GO:0005886,GO:0030968,GO:0005524,GO:0009581,GO:0005739,	EC:3.1.3.16,EC:2.7.11,	probable lrr receptor-like serine threonine-protein kinase at1g74360-like
02-30_47-aMSMS-6550.3298.3303.3.pkl	47.62	21	11	0	3	23	3	65	0.68	28.9	GO:0010363,GO:0002679,GO:0010200,GO:0002229,GO:0032440,GO:0006612,GO:0050832,GO:0042742,GO:0043069,GO:0046982,GO:0006468,GO:0004674,GO:0043234,GO:0009742,GO:0016021,GO:0008219,GO:0004714,GO:0005768,GO:0055114,GO:0016049,GO:0033612,GO:0009863,GO:0005886,GO:0030968,GO:0005524,	EC:2.7.10.1,EC:1.3.1.74,EC:2.7.11,	brassinosteroid insensitive 1-associated receptor kinase 1
02-30_47-aMSMS-6550.1970.1973.3.pkl	86.67	15	2	0	1	15	365	409	0.074	31.6	GO:0005829,GO:0033358,GO:0050373,GO:0045227,GO:0009555,GO:0046983,GO:0003978,GO:0050662,GO:0005794,GO:0005886,GO:0046369,	EC:5.1.3.2,EC:5.1.3.5,	udp-glucose 4-epimerase
02-30_47-aMSMS-6550.3079.3086.3.pkl	92	25	2	0	1	25	1331	1405	1e-06	46.2	GO:0004743,GO:0016310,GO:0030955,GO:0000287,GO:0006096,	EC:2.7.1.40,	pyruvate cytosolic isozyme-like
02-30_47-aMSMS-6550.1868.1868.3.pkl	80	20	4	0	1	20	189	248	0.001	37	GO:0042409,GO:0046872,GO:0003676,GO:0032259,GO:0005829,GO:0015074,	EC:2.1.1.104,	caffeoyl- o-methyltransferase
02-30_47-aMSMS-6550.1970.1973.3.pkl	90.91	11	1	0	3	13	666	698	5	25.8	GO:0005975,GO:0005794,GO:0009225,GO:0050662,GO:0016020,GO:0050378,	EC:5.1.3.6,	udp-d-glucuronate 4-epimerase 2
02-30_47-aMSMS-6550.2565.2565.2.pkl	100	13	0	0	1	13	596	558	0.022	32.7	GO:0044237,GO:0048040,GO:0050662,	EC:4.1.1.35,	udp-glucuronic acid decarboxylase 1
02-30_47-aMSMS-6550.3298.3303.3.pkl	47.83	23	12	0	1	23	2536	2604	0.46	29.3	GO:0005829,GO:0016021,GO:0006468,GO:0009506,GO:0005524,GO:0000186,GO:0004709,GO:0005576,GO:0005794,GO:0005886,GO:0000165,	EC:2.7.11.25,EC:2.7.11,	receptor-like kinase
02-30_47-aMSMS-6550.3298.3303.3.pkl	47.83	23	12	0	1	23	905	837	0.49	29.3	GO:0005829,GO:0016021,GO:0006468,GO:0009506,GO:0005524,GO:0000186,GO:0004709,GO:0005576,GO:0005794,GO:0005886,GO:0000165,	EC:2.7.11.25,EC:2.7.11,	receptor-like kinase
02-30_47-aMSMS-6550.3079.3086.3.pkl	92	25	2	0	1	25	5900	5826	8e-07	46.6	GO:0004743,GO:0046686,GO:0005886,GO:0016310,GO:0030955,GO:0000287,GO:0006096,GO:0005829,	EC:2.7.1.40,	pyruvate cytosolic isozyme-like
02-30_47-aMSMS-6550.3426.3430.0.pkl	53.85	26	12	0	1	26	860	783	0.1	31.2	GO:0016491,GO:0000166,GO:0055114,GO:0008270,	0	cinnamyl alcohol dehydrogenase-like protein
02-30_47-aMSMS-6550.3426.3430.0.pkl	57.69	26	11	0	1	26	989	1066	0.095	31.6	GO:0046029,GO:0000166,GO:0055114,GO:0008270,	EC:1.1.1.255,	cinnamyl alcohol dehydrogenase-like protein
02-30_47-aMSMS-6550.1868.1868.3.pkl	80	20	4	0	1	20	982	923	0.001	37	GO:0042409,GO:0003676,GO:0032259,GO:0005829,GO:0015074,	EC:2.1.1.104,	caffeoyl- o-methyltransferase
02-30_47-aMSMS-6550.3298.3303.3.pkl	60.87	23	9	0	1	23	1060	992	8e-04	37.4	GO:0005886,GO:0006468,GO:0005524,GO:0016021,GO:0004674,GO:0005739,	EC:2.7.11,	probable lrr receptor-like serine threonine-protein kinase at5g10290-like
02-30_47-aMSMS-6550.1786.1790.2.pkl	100	11	0	0	1	11	1507	1539	8.5	25	GO:0001666,GO:0009011,GO:0010264,GO:0009501,GO:0019375,GO:0019252,GO:0033840,GO:0009507,	EC:2.4.1.242,EC:2.4.1.21,	granule-bound starch synthase
02-30_47-aMSMS-6550.1970.1973.3.pkl	88.24	17	2	0	1	17	1933	1883	0.002	36.2	GO:0005768,GO:0048040,GO:0042732,GO:0005794,GO:0005886,GO:0009225,GO:0050662,GO:0005802,	EC:4.1.1.35,	udp-glucuronic acid decarboxylase 1
02-30_47-aMSMS-6550.3298.3303.3.pkl	47.83	23	12	0	1	23	1503	1435	0.61	28.9	GO:0006468,GO:0004672,GO:0009506,GO:0048367,GO:0009505,GO:0005524,GO:0048513,GO:0009791,GO:0007165,GO:0005886,	0	probable lrr receptor-like serine threonine-protein kinase at2g16250-like
02-30_47-aMSMS-6550.2565.2565.2.pkl	100	14	0	0	1	14	900	859	0.004	35	GO:0048040,GO:0009750,GO:0009744,GO:0042732,GO:0005886,GO:0009749,GO:0009225,GO:0050662,GO:0005829,	EC:4.1.1.35,	udp-xyl synthase 5
02-30_47-aMSMS-6550.1970.1973.3.pkl	100	17	0	0	1	17	1022	972	5e-04	37.7	GO:0044237,GO:0048040,GO:0050662,	EC:4.1.1.35,	dtdp-glucose 4-6-
02-30_47-aMSMS-6550.3298.3303.3.pkl	47.83	23	12	0	1	23	1968	1900	0.37	29.6	GO:0016491,GO:0016310,GO:0004672,GO:0016020,GO:0000166,	0	receptor-like protein kinase hsl1-like
02-30_47-aMSMS-6550.2541.2541.2.pkl	66.67	15	5	0	1	15	1091	1135	0.2	30	GO:0030170,GO:0006563,GO:0009055,GO:0020037,GO:0035999,GO:0032259,GO:0008168,GO:0004372,GO:0006544,	EC:2.1.2.1,	serine hydroxymethyltransferase
02-30_47-aMSMS-6550.3298.3303.3.pkl	52.17	23	11	0	1	23	3014	3082	0.19	30.4	GO:0048653,GO:0009414,GO:0016023,GO:0048508,GO:0009846,GO:0010152,GO:0007169,GO:0006468,GO:0004674,GO:0016021,GO:0009808,GO:0009409,GO:0051260,GO:0009945,GO:0005886,GO:0010073,GO:0005524,GO:0009942,GO:0005739,	EC:2.7.11,	leucine rich repeat receptor protein kinase 2
02-30_47-aMSMS-6550.3426.3430.0.pkl	53.85	26	12	0	1	26	525	602	0.08	31.2	GO:0046029,GO:0000166,GO:0055114,GO:0008270,	EC:1.1.1.255,	cinnamyl alcohol dehydrogenase-like protein
02-30_47-aMSMS-6550.3426.3430.0.pkl	53.85	26	12	0	1	26	948	871	0.11	31.2	GO:0016491,GO:0000166,GO:0055114,GO:0008270,	0	cinnamyl alcohol dehydrogenase-like protein
02-30_47-aMSMS-6550.2379.2383.3.pkl	70.59	17	5	0	1	17	217	267	0.36	28.5	GO:0048868,GO:0005829,GO:0003723,GO:0006278,GO:0009506,GO:0048610,GO:0003964,GO:0004022,GO:0046482,GO:0050662,GO:0005794,GO:0005886,	EC:2.7.7.49,EC:1.1.1.1,	rossmann-fold nad -binding domain-containing protein
02-30_47-aMSMS-6550.2379.2383.3.pkl	55.56	18	8	0	1	18	200	253	4.2	26.2	GO:0016621,GO:0019761,GO:0045552,GO:0009809,GO:0050662,GO:0005829,GO:0055114,	EC:1.2.1.44,EC:1.1.1.219,	cinnamoyl- reductase
02-30_47-aMSMS-6550.1970.1973.3.pkl	90.91	11	1	0	3	13	398	430	4.9	25.8	GO:0016036,GO:0050378,GO:0005802,GO:0019375,GO:0005515,GO:0042631,GO:0050379,GO:0009225,GO:0005794,GO:0005975,GO:0050662,GO:0006569,GO:0005768,GO:0009684,	EC:5.1.3.12,EC:5.1.3.6,	udp-d-glucuronic acid 4-epimerase
02-30_47-aMSMS-6550.3298.3303.3.pkl	52.17	23	11	0	1	23	3121	3189	0.32	30	GO:0048653,GO:0009414,GO:0016023,GO:0048508,GO:0009846,GO:0010152,GO:0007169,GO:0006468,GO:0004674,GO:0016021,GO:0009808,GO:0009409,GO:0051260,GO:0009945,GO:0005886,GO:0010073,GO:0005524,GO:0009942,GO:0005739,	EC:2.7.11,	leucine rich repeat receptor protein kinase 2
02-30_47-aMSMS-6550.2059.2063.4.pkl	86.36	22	3	0	1	22	614	549	7e-05	40	GO:0080167,	0	gamma-glutamylcyclotransferase at3g02910-like
02-30_47-aMSMS-6550.2565.2565.2.pkl	100	14	0	0	1	14	900	859	0.003	35	GO:0048040,GO:0009750,GO:0009744,GO:0042732,GO:0005886,GO:0009749,GO:0009225,GO:0050662,GO:0005829,	EC:4.1.1.35,	udp-xyl synthase 5
02-30_47-aMSMS-6550.3298.3303.3.pkl	47.83	23	12	0	1	23	2531	2599	0.63	28.9	GO:0016021,GO:0006468,GO:0005524,GO:0000186,GO:0004709,GO:0000165,	EC:2.7.11.25,EC:2.7.11,	receptor-like protein kinase
02-30_47-aMSMS-6550.3079.3086.3.pkl	92	25	2	0	1	25	1331	1405	1e-06	46.2	GO:0004743,GO:0016310,GO:0030955,GO:0000287,GO:0006096,	EC:2.7.1.40,	pyruvate cytosolic isozyme-like
02-30_47-aMSMS-6550.1868.1868.3.pkl	80	20	4	0	1	20	189	248	9e-04	37	GO:0042409,GO:0003676,GO:0032259,GO:0005829,GO:0015074,	EC:2.1.1.104,	caffeoyl- o-methyltransferase
02-30_47-aMSMS-6550.2565.2565.2.pkl	100	13	0	0	1	13	596	558	0.022	32.7	GO:0044237,GO:0048040,GO:0050662,	EC:4.1.1.35,	udp-glucuronic acid decarboxylase 1
02-30_47-aMSMS-6550.3426.3430.0.pkl	57.69	26	11	0	1	26	2349	2426	0.088	31.6	GO:0046029,GO:0055114,GO:0008270,	EC:1.1.1.255,	cinnamyl alcohol dehydrogenase-like protein
02-30_47-aMSMS-6550.3079.3086.3.pkl	73.91	23	6	0	1	23	784	716	0.004	35.4	GO:0010498,GO:0030955,GO:0005739,GO:0007010,GO:0005524,GO:0004743,GO:0000287,GO:0006096,GO:0016310,GO:0006094,	EC:2.7.1.40,	pyruvate kinase
02-30_47-aMSMS-6550.2059.2063.4.pkl	94.74	19	1	0	1	19	585	529	1e-04	39.7	GO:0080167,	0	gamma-glutamylcyclotransferase at3g02910-like
02-30_47-aMSMS-6550.1868.1868.3.pkl	95	20	1	0	1	20	398	339	2e-05	40.8	GO:0006598,GO:0005829,GO:0009805,GO:0046872,GO:0009611,GO:0032259,GO:0009963,GO:0042398,GO:0009809,GO:0042409,GO:0046686,GO:0019344,GO:0005634,	EC:2.1.1.104,	caffeoyl- 3-o- partial
02-30_47-aMSMS-6550.1985.1988.2.pkl	66.67	15	5	0	1	15	1563	1607	4.4	26.2	GO:0009695,GO:0031408,GO:0034440,GO:0016165,GO:0009611,GO:0005886,GO:0005506,GO:0040007,GO:0009507,	EC:1.13.11.12,	protein
02-30_47-aMSMS-6550.1970.1973.3.pkl	71.43	14	4	0	1	14	1429	1388	0.79	28.1	GO:0050379,GO:0005768,GO:0005975,GO:0005794,GO:0009225,GO:0050662,GO:0050378,GO:0005802,	EC:5.1.3.12,EC:5.1.3.6,	protein
02-30_47-aMSMS-6550.1970.1973.3.pkl	64.29	14	5	0	1	14	287	328	8.9	25	GO:0016021,GO:0008270,GO:0048364,GO:0005739,GO:0010264,GO:0051301,GO:0004842,GO:0016567,GO:0050662,GO:0005886,	EC:6.3.2.19,	nad dependent epimerase dehydratase family protein
02-30_47-aMSMS-6550.3079.3086.3.pkl	52.17	23	11	0	1	23	1599	1667	2.9	26.9	GO:0006633,GO:0030955,GO:0010431,GO:0005739,GO:0005524,GO:0004743,GO:0000287,GO:0006096,GO:0016310,GO:0009570,GO:0046686,	EC:2.7.1.40,	pyruvate kinase isozyme chloroplastic-like
02-30_47-aMSMS-6550.2236.2236.2.pkl	100	10	0	0	1	10	901	872	4	25.8	GO:0034976,GO:0005509,GO:0005739,GO:0006457,GO:0009651,GO:0009408,GO:0009627,GO:0005788,GO:0051082,GO:0009507,GO:0005773,GO:0009644,GO:0042542,GO:0005794,GO:0048046,	0	calreticulin
02-30_47-aMSMS-6550.1985.1988.2.pkl	66.67	15	5	0	1	15	1563	1607	4.4	26.2	GO:0009695,GO:0031408,GO:0034440,GO:0016165,GO:0009611,GO:0005886,GO:0005506,GO:0040007,GO:0009507,	EC:1.13.11.12,	protein
02-30_47-aMSMS-6550.3298.3303.3.pkl	43.48	23	13	0	1	23	3164	3232	0.99	28.5	GO:0004707,GO:0016021,GO:0006468,GO:0055114,GO:0010103,GO:0007169,GO:0016023,GO:0005524,GO:0048443,GO:0002237,GO:0032440,GO:0010067,GO:0005886,GO:0000165,	EC:2.7.11.24,EC:1.3.1.74,	leucine-rich repeat receptor-like protein kinase pxl2-like
02-30_47-aMSMS-6550.1970.1973.3.pkl	71.43	14	4	0	1	14	504	545	0.76	28.1	GO:0050378,GO:0005975,GO:0005768,GO:0019375,GO:0042631,GO:0005802,GO:0050662,GO:0009225,GO:0016036,GO:0016020,GO:0005794,	EC:5.1.3.6,	pinus taeda anonymous locus 2_10352_02 genomic sequence
02-30_47-aMSMS-6550.3298.3303.3.pkl	60.87	23	9	0	1	23	2241	2309	0.002	36.2	GO:0016021,GO:0006468,GO:0004674,GO:0010075,GO:0016023,GO:0005524,GO:0048653,GO:0007020,GO:0005576,GO:0004715,GO:0005886,	EC:2.7.10.2,EC:2.7.11,	leucine-rich repeat receptor-like kinase
02-30_47-aMSMS-6550.3298.3303.3.pkl	50	22	11	0	1	22	1116	1051	0.32	30	GO:0016491,GO:0016310,GO:0004672,GO:0016020,GO:0000166,	0	protein
02-30_47-aMSMS-6550.1970.1973.3.pkl	82.35	17	3	0	1	17	1841	1791	0.007	34.3	GO:0005829,GO:0048040,GO:0000139,GO:0042732,GO:0019305,GO:0005768,GO:0005774,GO:0005802,GO:0050662,GO:0005886,GO:0008460,	EC:4.2.1.46,EC:4.1.1.35,	udp-glucuronic acid decarboxylase 1-like
02-30_47-aMSMS-6550.1764.1764.2.pkl	100	18	0	0	1	18	1354	1301	5e-04	37.7	GO:0004001,GO:0006166,GO:0016773,GO:0006167,GO:0016310,	EC:2.7.1.20,	adenosine kinase
02-30_47-aMSMS-6550.2565.2565.2.pkl	100	14	0	0	1	14	683	642	0.004	35	GO:0048040,GO:0009750,GO:0009744,GO:0042732,GO:0005886,GO:0009749,GO:0009225,GO:0050662,GO:0005829,	EC:4.1.1.35,	udp-xyl synthase 5
02-30_47-aMSMS-6550.3298.3303.3.pkl	47.83	23	12	0	1	23	3164	3232	0.83	28.5	GO:0031348,GO:0004721,GO:0009595,GO:0009867,GO:0009862,GO:0016023,GO:0010363,GO:0010310,GO:0002679,GO:0010200,GO:0006612,GO:0050832,GO:0042742,GO:0043069,GO:0007169,GO:0006468,GO:0004674,GO:0000165,GO:0016021,GO:0052542,GO:0005886,GO:0030968,GO:0005524,GO:0009581,GO:0005739,	EC:3.1.3.16,EC:2.7.11,	probable lrr receptor-like serine threonine-protein kinase at1g74360-like
02-30_47-aMSMS-6550.3079.3086.3.pkl	56.52	23	10	0	1	23	15	83	0.33	27.3	GO:0006468,GO:0006633,GO:0030955,GO:0010431,GO:0004672,GO:0005739,GO:0005524,GO:0004743,GO:0000287,GO:0006096,GO:0009570,GO:0046686,	EC:2.7.1.40,	pyruvate kinase isozyme chloroplastic-like
02-30_47-aMSMS-6550.3079.3086.3.pkl	92	25	2	0	1	25	4873	4799	8e-07	46.6	GO:0004743,GO:0046686,GO:0005886,GO:0016310,GO:0030955,GO:0000287,GO:0006096,GO:0005829,	EC:2.7.1.40,	pyruvate cytosolic isozyme-like
02-30_47-aMSMS-6550.1970.1973.3.pkl	80	15	3	0	1	15	851	895	0.55	28.9	GO:0052542,GO:0006012,GO:0035556,GO:0009723,GO:0050373,GO:0009738,GO:0003978,GO:0050662,GO:0009225,GO:0009832,GO:0019567,GO:0005794,GO:0006865,	EC:5.1.3.2,EC:5.1.3.5,	udp-arabinose 4-epimerase
02-30_47-aMSMS-6550.2541.2541.2.pkl	66.67	15	5	0	1	15	1056	1100	0.35	29.3	GO:0005737,GO:0030170,GO:0006563,GO:0046686,GO:0009055,GO:0020037,GO:0035999,GO:0032259,GO:0008168,GO:0004372,GO:0006544,	EC:2.1.2.1,	serine hydroxymethyltransferase
02-30_47-aMSMS-6550.1970.1973.3.pkl	58.82	17	7	0	1	17	2785	2735	1.6	27.3	GO:0008460,GO:0010253,GO:0010489,GO:0009507,GO:0045226,GO:0010214,GO:0009744,GO:0050377,GO:0005829,GO:0051555,GO:0050662,GO:0010224,GO:0010315,GO:0010192,GO:0008831,GO:0010490,GO:0009506,GO:0010280,	EC:4.2.1.46,EC:1.1.1.133,EC:4.2.1.76,	udp-glucose -dehydratase
02-30_47-aMSMS-6550.3298.3303.3.pkl	47.83	23	12	0	1	23	3265	3333	0.71	28.9	GO:0010103,GO:0000186,GO:0032440,GO:0007169,GO:0006468,GO:0000165,GO:0006486,GO:0016021,GO:0004709,GO:0055114,GO:0002237,GO:0005886,GO:0005524,GO:0048443,	EC:2.7.11.25,EC:1.3.1.74,EC:2.7.11,	probable leucine-rich repeat receptor-like protein kinase at2g33170-like
02-30_47-aMSMS-6550.1931.1934.2.pkl	100	12	0	0	1	12	357	392	2.5	26.2	GO:0016157,GO:0009058,GO:0005985,	EC:2.4.1.13,	sucrose synthase sus1
02-30_47-aMSMS-6550.3079.3086.3.pkl	92	25	2	0	1	25	4323	4249	8e-07	46.6	GO:0004743,GO:0046686,GO:0005886,GO:0016310,GO:0030955,GO:0000287,GO:0006096,GO:0005829,	EC:2.7.1.40,	pyruvate cytosolic isozyme-like
02-30_47-aMSMS-6550.3298.3303.3.pkl	43.48	23	13	0	1	23	3164	3232	0.99	28.5	GO:0004707,GO:0016021,GO:0006468,GO:0055114,GO:0010103,GO:0007169,GO:0016023,GO:0005524,GO:0048443,GO:0002237,GO:0032440,GO:0010067,GO:0005886,GO:0000165,	EC:2.7.11.24,EC:1.3.1.74,	leucine-rich repeat receptor-like protein kinase pxl2-like
02-30_47-aMSMS-6550.2379.2383.3.pkl	55.56	18	8	0	1	18	200	253	4.3	26.2	GO:0016621,GO:0019761,GO:0045552,GO:0009809,GO:0050662,GO:0005829,GO:0055114,	EC:1.2.1.44,EC:1.1.1.219,	cinnamoyl- reductase
02-30_47-aMSMS-6550.3426.3430.0.pkl	53.85	26	12	0	1	26	948	871	0.11	31.2	GO:0016491,GO:0000166,GO:0055114,GO:0008270,	0	cinnamyl alcohol dehydrogenase-like protein
02-30_47-aMSMS-6550.3298.3303.3.pkl	47.83	23	12	0	1	23	1968	1900	0.37	29.6	GO:0016491,GO:0016310,GO:0004672,GO:0016020,GO:0000166,	0	receptor-like protein kinase hsl1-like
02-30_47-aMSMS-6550.2379.2383.3.pkl	64.71	17	6	0	1	17	289	339	2.7	25.8	GO:0045551,GO:0052747,GO:0003964,GO:0048868,GO:0006278,GO:0003723,GO:0045552,GO:0004022,GO:0050662,GO:0048610,GO:0055114,	EC:2.7.7.49,EC:1.1.1.195,EC:1.1.1.1,EC:1.1.1.219,	cinnamyl alcohol dehydrogenase
02-30_47-aMSMS-6550.2541.2541.2.pkl	68.75	16	5	0	1	16	727	774	0.15	30.4	GO:0006563,GO:0019684,GO:0009853,GO:0048046,GO:0005515,GO:0010319,GO:0009697,GO:0004372,GO:0022626,GO:0008168,GO:0005759,GO:0042742,GO:0035999,GO:0009570,GO:0030170,GO:0009814,GO:0032259,GO:0009416,GO:0046686,GO:0009409,GO:0009626,GO:0009534,GO:0005886,GO:0008266,GO:0005634,GO:0019464,GO:0007623,	EC:2.1.2.1,	glycine hydroxymethyltransferase
02-30_47-aMSMS-6550.1970.1973.3.pkl	88.24	17	2	0	1	17	791	841	0.001	36.6	GO:0005768,GO:0048040,GO:0042732,GO:0005794,GO:0005886,GO:0009225,GO:0050662,GO:0005802,GO:0005739,	EC:4.1.1.35,	udp-glucuronic acid decarboxylase 1
02-30_47-aMSMS-6550.0829.0836.2.pkl	100	9	0	0	1	9	86	60	4.2	23.5	GO:0005874,GO:0051258,GO:0006184,GO:0007017,GO:0003924,GO:0005200,GO:0005737,GO:0005525,	0	beta- partial
02-30_47-aMSMS-6550.3298.3303.3.pkl	39.13	23	14	0	1	23	3852	3920	0.8	28.5	GO:0016021,GO:0006468,GO:0055114,GO:0004674,GO:0004888,GO:0009611,GO:0007169,GO:0005524,GO:0001653,GO:0032440,GO:0031347,GO:0004721,GO:0005886,	EC:3.1.3.16,EC:1.3.1.74,EC:2.7.11,	phytosulfokine receptor
02-30_47-aMSMS-6550.3298.3303.3.pkl	43.48	23	13	0	1	23	1327	1259	0.95	28.5	GO:0042803,GO:0005496,GO:0016021,GO:0000186,GO:1900140,GO:0043234,GO:0010584,GO:0006952,GO:0048657,GO:0009911,GO:0009729,GO:0008544,GO:0004709,GO:0010224,GO:0005886,GO:0048366,GO:0010268,GO:0005524,GO:0009826,GO:0060548,GO:0046982,GO:0004721,GO:0009742,GO:0000165,GO:0006468,GO:0005768,GO:0009617,	EC:2.7.11.25,EC:3.1.3.16,EC:2.7.11,	brassinosteroid receptor
02-30_47-aMSMS-6550.1970.1973.3.pkl	64.29	14	5	0	1	14	287	328	8.8	25	GO:0016021,GO:0008270,GO:0048364,GO:0005739,GO:0010264,GO:0051301,GO:0004842,GO:0016567,GO:0050662,GO:0005886,	EC:6.3.2.19,	nad dependent epimerase dehydratase family protein
02-30_47-aMSMS-6550.3426.3430.0.pkl	100	26	0	0	1	26	574	651	1e-10	57	GO:0045551,GO:0052747,GO:0009809,GO:0008270,GO:0055114,	EC:1.1.1.195,	cinnamyl alcohol dehydrogenase
02-30_47-aMSMS-6550.2211.2211.3.pkl	100	11	0	0	1	11	499	531	3.3	25.4	GO:0048767,GO:0006833,GO:0005525,GO:0000271,GO:0043481,GO:0009825,GO:0007018,GO:0007010,GO:0019344,GO:0016126,GO:0005200,GO:0006096,GO:0009651,GO:0009740,GO:0010498,GO:0010162,GO:0005886,GO:0005737,GO:0006084,GO:0051258,GO:0016132,GO:0005874,GO:0006972,GO:0003924,GO:0046686,GO:0009409,GO:0009932,GO:0007030,GO:0006184,GO:0006094,GO:0071555,	0	tubulin-like protein
02-30_47-aMSMS-6550.2379.2383.3.pkl	70.59	17	5	0	1	17	217	267	0.27	30	GO:0006468,GO:0009553,GO:0080008,GO:0016905,GO:0051604,GO:0004713,GO:0005524,GO:0042254,GO:0005634,	EC:2.7.11.7,EC:2.7.10,	notchless protein homolog
02-30_47-aMSMS-6550.1868.1868.3.pkl	80	20	4	0	1	20	982	923	0.001	37	GO:0042409,GO:0003676,GO:0032259,GO:0005829,GO:0015074,	EC:2.1.1.104,	caffeoyl- o-methyltransferase
02-30_47-aMSMS-6550.1970.1973.3.pkl	86.67	15	2	0	1	15	365	409	0.067	31.6	GO:0005829,GO:0033358,GO:0050373,GO:0045227,GO:0009555,GO:0046983,GO:0003978,GO:0050662,GO:0005794,GO:0005886,GO:0046369,	EC:5.1.3.2,EC:5.1.3.5,	udp-glucose 4-epimerase
02-30_47-aMSMS-6550.2379.2383.3.pkl	70.59	17	5	0	1	17	217	267	0.36	28.5	GO:0048868,GO:0005829,GO:0003723,GO:0006278,GO:0009506,GO:0048610,GO:0003964,GO:0004022,GO:0046482,GO:0050662,GO:0005794,GO:0005886,	EC:2.7.7.49,EC:1.1.1.1,	rossmann-fold nad -binding domain-containing protein
02-30_47-aMSMS-6550.3079.3086.3.pkl	73.91	23	6	0	1	23	1110	1178	7e-04	37.7	GO:0005829,GO:0010498,GO:0030955,GO:0007010,GO:0005524,GO:0004743,GO:0000287,GO:0006096,GO:0016310,GO:0006094,GO:0006865,	EC:2.7.1.40,	pyruvate kinase
02-30_47-aMSMS-6550.3298.3303.3.pkl	47.83	23	12	0	1	23	2503	2571	0.92	28.5	GO:0016021,GO:0006468,GO:0005524,GO:0000186,GO:0004709,GO:0000165,	EC:2.7.11.25,EC:2.7.11,	receptor-like protein kinase
02-30_47-aMSMS-6550.1970.1973.3.pkl	80	15	3	0	1	15	851	895	0.53	28.5	GO:0048868,GO:0052542,GO:0006012,GO:0035556,GO:0009723,GO:0050373,GO:0009738,GO:0003978,GO:0050662,GO:0009225,GO:0009832,GO:0019567,GO:0005794,GO:0009793,	EC:5.1.3.2,EC:5.1.3.5,	udp-arabinose 4-epimerase
02-30_47-aMSMS-6550.2565.2565.2.pkl	100	14	0	0	1	14	1255	1296	0.004	35	GO:0048040,GO:0009750,GO:0009744,GO:0042732,GO:0005886,GO:0009749,GO:0009225,GO:0050662,GO:0005829,	EC:4.1.1.35,	udp-xyl synthase 6
02-30_47-aMSMS-6550.1970.1973.3.pkl	86.67	15	2	0	1	15	1230	1186	0.064	31.6	GO:0005829,GO:0033358,GO:0050373,GO:0045227,GO:0009555,GO:0046983,GO:0003978,GO:0050662,GO:0005794,GO:0005886,GO:0046369,	EC:5.1.3.2,EC:5.1.3.5,	udp-glucose 4-epimerase
02-30_47-aMSMS-6550.1970.1973.3.pkl	64.29	14	5	0	1	14	287	328	8.8	25	GO:0016021,GO:0008270,GO:0048364,GO:0005739,GO:0010264,GO:0051301,GO:0004842,GO:0016567,GO:0050662,GO:0005886,	EC:6.3.2.19,	nad dependent epimerase dehydratase family protein
02-30_47-aMSMS-6550.2541.2541.2.pkl	68.75	16	5	0	1	16	559	606	0.1	30.8	GO:0019684,GO:0006563,GO:0009750,GO:0009853,GO:0009749,GO:0048046,GO:0008270,GO:0010319,GO:0009697,GO:0004372,GO:0022626,GO:0008168,GO:0005759,GO:0042742,GO:0035999,GO:0009744,GO:0050897,GO:0005747,GO:0009570,GO:0030170,GO:0009814,GO:0032259,GO:0046686,GO:0009409,GO:0009626,GO:0009534,GO:0005886,GO:0008266,GO:0005634,GO:0019464,	EC:2.1.2.1,	glycine hydroxymethyltransferase
02-30_47-aMSMS-6550.3426.3430.0.pkl	56	25	11	0	2	26	647	573	0.017	33.5	GO:0046685,GO:0042344,GO:0015700,GO:0009697,GO:0048037,GO:0005507,GO:0010363,GO:0010200,GO:0034976,GO:0031348,GO:0046870,GO:0050832,GO:0043069,GO:0005829,GO:0009867,GO:0019684,GO:0009626,GO:0009595,GO:0042742,GO:0006612,GO:0046482,GO:0010310,GO:0071992,GO:0046938,GO:0016756,GO:0052544,GO:0008270,GO:0009862,GO:0015446,GO:0010337,GO:0046029,GO:0046686,GO:0009409,GO:0009809,GO:0000165,GO:0006635,GO:…	EC:1.1.1.255,EC:2.3.2.15,EC:3.6.3.16,	cinnamyl alcohol dehydrogenase
02-30_47-aMSMS-6550.3298.3303.3.pkl	47.83	23	12	0	1	23	3079	3011	0.37	29.6	GO:0016491,GO:0016310,GO:0004672,GO:0016020,GO:0000166,	0	receptor-like protein kinase hsl1-like
02-30_47-aMSMS-6550.3079.3086.3.pkl	92	25	2	0	1	25	1396	1470	6e-07	46.6	GO:0004743,GO:0046686,GO:0005886,GO:0016310,GO:0030955,GO:0000287,GO:0006096,GO:0005829,	EC:2.7.1.40,	pyruvate cytosolic isozyme-like
02-30_47-aMSMS-6550.3298.3303.3.pkl	68.18	22	7	0	1	22	811	746	0.013	33.9	GO:0016021,GO:0006468,GO:0055114,GO:0004674,GO:0010103,GO:0007169,GO:0005524,GO:0048443,GO:0002237,GO:0032440,GO:0005886,	EC:1.3.1.74,EC:2.7.11,	protein
02-30_47-aMSMS-6550.3298.3303.3.pkl	47.83	23	12	0	1	23	2617	2685	0.28	30	GO:0000166,GO:0010363,GO:0002679,GO:0010200,GO:0016491,GO:0006612,GO:0016310,GO:0043069,GO:0004674,GO:0052542,GO:0009738,GO:0009723,GO:0005886,GO:0035556,	EC:2.7.11,	receptor-like protein kinase hsl1-like
02-30_47-aMSMS-6550.1970.1973.3.pkl	86.67	15	2	0	1	15	365	409	0.067	31.6	GO:0005829,GO:0033358,GO:0050373,GO:0045227,GO:0009555,GO:0046983,GO:0003978,GO:0050662,GO:0005794,GO:0005886,GO:0046369,	EC:5.1.3.2,EC:5.1.3.5,	udp-glucose 4-epimerase
02-30_47-aMSMS-6550.1970.1973.3.pkl	84.62	13	2	0	1	13	1286	1248	0.43	29.3	GO:0052542,GO:0006012,GO:0035556,GO:0009723,GO:0050373,GO:0009738,GO:0003978,GO:0050662,GO:0009225,GO:0009832,GO:0019567,GO:0005794,GO:0006865,	EC:5.1.3.2,EC:5.1.3.5,	udp-d-xylose 4-epimerase
02-30_47-aMSMS-6550.2541.2541.2.pkl	80	15	3	0	1	15	1942	1898	0.007	34.3	GO:0005737,GO:0030170,GO:0006563,GO:0046686,GO:0035999,GO:0032259,GO:0008168,GO:0004372,GO:0006544,	EC:2.1.2.1,	serine hydroxymethyltransferase 1-like
02-30_47-aMSMS-6550.1970.1973.3.pkl	58.82	17	7	0	1	17	2785	2735	1.6	27.3	GO:0008460,GO:0010253,GO:0010489,GO:0009507,GO:0045226,GO:0010214,GO:0009744,GO:0050377,GO:0005829,GO:0051555,GO:0050662,GO:0010224,GO:0010315,GO:0010192,GO:0008831,GO:0010490,GO:0009506,GO:0010280,	EC:4.2.1.46,EC:1.1.1.133,EC:4.2.1.76,	udp-glucose -dehydratase
02-30_47-aMSMS-6550.1970.1973.3.pkl	58.82	17	7	0	1	17	419	469	1.6	27.3	GO:0008460,GO:0010253,GO:0010489,GO:0009507,GO:0045226,GO:0010214,GO:0009744,GO:0050377,GO:0005829,GO:0051555,GO:0050662,GO:0010224,GO:0010315,GO:0010192,GO:0008831,GO:0010490,GO:0009506,GO:0010280,	EC:4.2.1.46,EC:1.1.1.133,EC:4.2.1.76,	udp-glucose -dehydratase
02-30_47-aMSMS-6550.3298.3303.3.pkl	43.48	23	13	0	1	23	879	811	0.75	28.9	GO:0010103,GO:0016023,GO:0000186,GO:0032440,GO:0007169,GO:0006468,GO:0000165,GO:0016021,GO:0004709,GO:0055114,GO:0002237,GO:0005886,GO:0005524,GO:0048443,	EC:2.7.11.25,EC:1.3.1.74,EC:2.7.11,	leucine-rich receptor-like protein kinase
02-30_47-aMSMS-6550.3079.3086.3.pkl	63.16	19	7	0	5	23	847	791	0.33	29.6	GO:0005829,GO:0030955,GO:0005524,GO:0004743,GO:0000023,GO:0019252,GO:0000287,GO:0006096,GO:0016310,GO:0046686,GO:0019761,GO:0043085,GO:0005886,	EC:2.7.1.40,	pyruvate kinase
02-30_47-aMSMS-6550.1970.1973.3.pkl	82.35	17	3	0	1	17	514	464	0.006	34.3	GO:0005829,GO:0048040,GO:0000139,GO:0042732,GO:0019305,GO:0005768,GO:0005774,GO:0005802,GO:0050662,GO:0005886,GO:0008460,	EC:4.2.1.46,EC:4.1.1.35,	udp-glucuronic acid decarboxylase 2
02-30_47-aMSMS-6550.1868.1868.3.pkl	90.91	11	1	0	10	20	135	103	9.3	23.1	GO:0042409,GO:0046872,GO:0009809,GO:0032259,	EC:2.1.1.104,	caffeoyl o-methyltransferase
02-30_47-aMSMS-6550.3298.3303.3.pkl	47.83	23	12	0	1	23	3546	3614	0.86	28.5	GO:0010103,GO:0000186,GO:0032440,GO:0007169,GO:0006468,GO:0000165,GO:0006486,GO:0016021,GO:0004709,GO:0055114,GO:0002237,GO:0005886,GO:0005524,GO:0048443,	EC:2.7.11.25,EC:1.3.1.74,EC:2.7.11,	leucine-rich repeat receptor-like protein kinase
02-30_47-aMSMS-6550.1970.1973.3.pkl	84.62	13	2	0	1	13	1376	1338	0.65	28.5	GO:0009684,GO:0050379,GO:0050378,GO:0005739,GO:0005975,GO:0005768,GO:0006569,GO:0005802,GO:0050662,GO:0009225,GO:0005794,	EC:5.1.3.12,EC:5.1.3.6,	udp-d-glucuronic acid 4-epimerase
02-30_47-aMSMS-6550.1868.1868.3.pkl	92.31	13	1	0	8	20	125	87	0.051	29.6	GO:0042409,GO:0003676,GO:0032259,GO:0005829,GO:0015074,	EC:2.1.1.104,	caffeoyl- -o-methyltransferase 1
02-30_47-aMSMS-6550.3298.3303.3.pkl	47.62	21	11	0	3	23	3	65	0.68	28.9	GO:0010363,GO:0002679,GO:0010200,GO:0002229,GO:0032440,GO:0006612,GO:0050832,GO:0042742,GO:0043069,GO:0046982,GO:0006468,GO:0004674,GO:0043234,GO:0009742,GO:0016021,GO:0008219,GO:0004714,GO:0005768,GO:0055114,GO:0016049,GO:0033612,GO:0009863,GO:0005886,GO:0030968,GO:0005524,	EC:2.7.10.1,EC:1.3.1.74,EC:2.7.11,	brassinosteroid insensitive 1-associated receptor kinase 1
02-30_47-aMSMS-6550.1970.1973.3.pkl	71.43	14	4	0	1	14	504	545	0.76	28.1	GO:0050378,GO:0005975,GO:0005768,GO:0019375,GO:0042631,GO:0005802,GO:0050662,GO:0009225,GO:0016036,GO:0016020,GO:0005794,	EC:5.1.3.6,	pinus taeda anonymous locus 2_10352_02 genomic sequence
02-30_47-aMSMS-6550.1970.1973.3.pkl	86.67	15	2	0	1	15	213	257	0.2	30	GO:0005794,GO:0005886,GO:0046983,GO:0044237,GO:0042546,GO:0003978,GO:0006012,GO:0050662,GO:0005829,	EC:5.1.3.2,	udp-d-glucose udp-d-galactose 4-epimerase 5
02-30_47-aMSMS-6550.3298.3303.3.pkl	47.83	23	12	0	1	23	3164	3232	0.83	28.5	GO:0031348,GO:0004721,GO:0009595,GO:0009867,GO:0009862,GO:0016023,GO:0010363,GO:0010310,GO:0002679,GO:0010200,GO:0006612,GO:0050832,GO:0042742,GO:0043069,GO:0007169,GO:0006468,GO:0004674,GO:0000165,GO:0016021,GO:0052542,GO:0005886,GO:0030968,GO:0005524,GO:0009581,GO:0005739,	EC:3.1.3.16,EC:2.7.11,	probable lrr receptor-like serine threonine-protein kinase at1g74360-like
02-30_47-aMSMS-6550.3426.3430.0.pkl	56.25	16	7	0	8	23	40	87	9.3	23.5	GO:0006073,GO:0005618,GO:0009733,GO:0004553,GO:0016762,GO:0009409,GO:0009741,GO:0009611,GO:0009408,GO:0010200,GO:0009664,GO:0009507,GO:0005794,GO:0009612,GO:0048046,	EC:2.4.1.207,	probable xyloglucan endotransglucosylase hydrolase protein 23
02-30_47-aMSMS-6550.3079.3086.3.pkl	92	25	2	0	1	25	5900	5826	8e-07	46.6	GO:0004743,GO:0046686,GO:0005886,GO:0016310,GO:0030955,GO:0000287,GO:0006096,GO:0005829,	EC:2.7.1.40,	pyruvate cytosolic isozyme-like
02-30_47-aMSMS-6550.1970.1973.3.pkl	76.92	13	3	0	3	15	1557	1519	3.8	26.2	GO:0045552,GO:0050662,GO:0005829,GO:0080110,GO:0055114,	EC:1.1.1.219,	cinnamoyl- reductase
02-30_47-aMSMS-6550.3079.3086.3.pkl	73.91	23	6	0	1	23	784	716	0.004	35.4	GO:0010498,GO:0030955,GO:0005739,GO:0007010,GO:0005524,GO:0004743,GO:0000287,GO:0006096,GO:0016310,GO:0006094,	EC:2.7.1.40,	pyruvate kinase
02-30_47-aMSMS-6550.3298.3303.3.pkl	47.83	23	12	0	1	23	2575	2643	0.58	28.9	GO:0004672,GO:0006468,GO:0005524,	0	probable lrr receptor-like serine threonine-protein kinase at2g16250-like
02-30_47-aMSMS-6550.2565.2565.2.pkl	100	14	0	0	1	14	683	642	0.004	35	GO:0048040,GO:0009750,GO:0009744,GO:0042732,GO:0005886,GO:0009749,GO:0009225,GO:0050662,GO:0005829,	EC:4.1.1.35,	udp-xyl synthase 5
02-30_47-aMSMS-6550.2379.2383.3.pkl	70.59	17	5	0	1	17	217	267	0.27	30	GO:0006468,GO:0009553,GO:0080008,GO:0016905,GO:0051604,GO:0004713,GO:0005524,GO:0042254,GO:0005634,	EC:2.7.11.7,EC:2.7.10,	notchless protein homolog
02-30_47-aMSMS-6550.1970.1973.3.pkl	82.35	17	3	0	1	17	514	464	0.006	34.3	GO:0005829,GO:0048040,GO:0000139,GO:0042732,GO:0019305,GO:0005768,GO:0005774,GO:0005802,GO:0050662,GO:0005886,GO:0008460,	EC:4.2.1.46,EC:4.1.1.35,	udp-glucuronic acid decarboxylase 2
02-30_47-aMSMS-6550.1970.1973.3.pkl	58.82	17	7	0	1	17	2785	2735	1.6	27.3	GO:0008460,GO:0010253,GO:0010489,GO:0009507,GO:0045226,GO:0010214,GO:0009744,GO:0050377,GO:0005829,GO:0051555,GO:0050662,GO:0010224,GO:0010315,GO:0010192,GO:0008831,GO:0010490,GO:0009506,GO:0010280,	EC:4.2.1.46,EC:1.1.1.133,EC:4.2.1.76,	udp-glucose -dehydratase
02-30_47-aMSMS-6550.3426.3430.0.pkl	56	25	11	0	2	26	453	379	0.006	34.7	GO:0046685,GO:0042344,GO:0015700,GO:0009697,GO:0048037,GO:0005507,GO:0010363,GO:0010200,GO:0034976,GO:0031348,GO:0046870,GO:0050832,GO:0043069,GO:0005829,GO:0009867,GO:0019684,GO:0009626,GO:0009595,GO:0042742,GO:0006612,GO:0046482,GO:0010310,GO:0071992,GO:0046938,GO:0016756,GO:0052544,GO:0008270,GO:0009862,GO:0015446,GO:0010337,GO:0046029,GO:0046686,GO:0009409,GO:0009809,GO:0000165,GO:0006635,GO:…	EC:1.1.1.255,EC:2.3.2.15,EC:3.6.3.16,	cinnamyl alcohol dehydrogenase
02-30_47-aMSMS-6550.3298.3303.3.pkl	68.18	22	7	0	1	22	811	746	0.013	33.9	GO:0016021,GO:0006468,GO:0055114,GO:0004674,GO:0010103,GO:0007169,GO:0005524,GO:0048443,GO:0002237,GO:0032440,GO:0005886,	EC:1.3.1.74,EC:2.7.11,	protein
02-30_47-aMSMS-6550.3298.3303.3.pkl	47.83	23	12	0	1	23	905	837	0.49	29.3	GO:0005829,GO:0016021,GO:0006468,GO:0009506,GO:0005524,GO:0000186,GO:0004709,GO:0005576,GO:0005794,GO:0005886,GO:0000165,	EC:2.7.11.25,EC:2.7.11,	receptor-like kinase
02-30_47-aMSMS-6550.3079.3086.3.pkl	92	25	2	0	1	25	1331	1405	1e-06	46.2	GO:0004743,GO:0016310,GO:0030955,GO:0000287,GO:0006096,	EC:2.7.1.40,	pyruvate cytosolic isozyme-like
02-30_47-aMSMS-6550.3298.3303.3.pkl	43.48	23	13	0	1	23	3164	3232	0.99	28.5	GO:0004707,GO:0016021,GO:0006468,GO:0055114,GO:0010103,GO:0007169,GO:0016023,GO:0005524,GO:0048443,GO:0002237,GO:0032440,GO:0010067,GO:0005886,GO:0000165,	EC:2.7.11.24,EC:1.3.1.74,	leucine-rich repeat receptor-like protein kinase pxl2-like
02-30_47-aMSMS-6550.3079.3086.3.pkl	52.17	23	11	0	1	23	917	849	2.3	27.3	GO:0006633,GO:0030955,GO:0010431,GO:0005739,GO:0005524,GO:0004743,GO:0000287,GO:0006096,GO:0016310,GO:0009570,GO:0046686,	EC:2.7.1.40,	pyruvate kinase isozyme chloroplastic-like
02-30_47-aMSMS-6550.2100.2104.3.pkl	90	10	1	0	4	13	137	108	2.8	24.3	--	--	--
02-30_47-aMSMS-6550.3298.3303.3.pkl	52.17	23	11	0	1	23	1020	952	0.93	28.5	GO:0010103,GO:0009960,GO:0004871,GO:0006499,GO:0010363,GO:0032440,GO:0006612,GO:0043069,GO:0046777,GO:0007169,GO:0004674,GO:0070825,GO:0009845,GO:0016021,GO:0055114,GO:0008233,GO:0002237,GO:0005886,GO:0005524,GO:0006979,GO:0048443,GO:0009627,	EC:1.3.1.74,EC:2.7.11,	receptor protein kinase clavata1
02-30_47-aMSMS-6550.3426.3430.0.pkl	57.69	26	11	0	1	26	4220	4143	0.095	31.6	GO:0031047,GO:0000226,GO:0000911,GO:0051567,GO:0048453,GO:0006342,GO:0005737,GO:0005874,GO:0003777,GO:0008017,GO:0006306,GO:0048451,GO:0016572,GO:0009909,GO:0007018,GO:0005871,GO:0005524,	0	di-glucose binding protein with kinesin motor domain
02-30_47-aMSMS-6550.1868.1868.3.pkl	85	20	3	0	1	20	612	553	1e-04	38.9	GO:0006598,GO:0005829,GO:0009805,GO:0046872,GO:0009611,GO:0032259,GO:0009963,GO:0042398,GO:0009809,GO:0042409,GO:0046686,GO:0019344,GO:0005634,	EC:2.1.1.104,	caffeoyl- 3-o-methyltransferase
02-30_47-aMSMS-6550.3298.3303.3.pkl	50	22	11	0	1	22	1116	1051	0.32	30	GO:0016491,GO:0016310,GO:0004672,GO:0016020,GO:0000166,	0	protein
02-30_47-aMSMS-6550.1970.1973.3.pkl	82.35	17	3	0	1	17	1830	1780	0.006	34.7	GO:0005829,GO:0048040,GO:0000139,GO:0042732,GO:0019305,GO:0005768,GO:0005774,GO:0005802,GO:0050662,GO:0005886,GO:0008460,	EC:4.2.1.46,EC:4.1.1.35,	udp-glucuronic acid decarboxylase 1-like
02-30_47-aMSMS-6550.3298.3303.3.pkl	52.17	23	11	0	1	23	1769	1837	0.011	34.3	GO:0004715,GO:0006468,GO:0005524,GO:0032440,GO:0016021,GO:0004674,GO:0055114,	EC:2.7.10.2,EC:1.3.1.74,EC:2.7.11,	somatic embryogenesis receptor kinase 1
02-30_47-aMSMS-6550.2379.2383.3.pkl	55.56	18	8	0	1	18	200	253	4.2	26.2	GO:0016621,GO:0019761,GO:0045552,GO:0009809,GO:0050662,GO:0005829,GO:0055114,	EC:1.2.1.44,EC:1.1.1.219,	cinnamoyl- reductase
02-30_47-aMSMS-6550.2565.2565.2.pkl	100	14	0	0	1	14	900	859	0.004	35	GO:0048040,GO:0009750,GO:0009744,GO:0042732,GO:0005886,GO:0009749,GO:0009225,GO:0050662,GO:0005829,	EC:4.1.1.35,	udp-xyl synthase 5
02-30_47-aMSMS-6550.3298.3303.3.pkl	52.17	23	11	0	1	23	892	824	0.12	31.2	GO:0016021,GO:0006468,GO:0055114,GO:0004674,GO:0009611,GO:0007169,GO:0016023,GO:0005524,GO:0001653,GO:0032440,GO:0009507,GO:0004721,GO:0005886,	EC:3.1.3.16,EC:1.3.1.74,EC:2.7.11,	phytosulfokine receptor 2-like
02-30_47-aMSMS-6550.1376.1381.2.pkl	100	10	0	0	1	10	57	86	1.2	25.4	GO:0005874,GO:0051258,GO:0006184,GO:0007017,GO:0003924,GO:0005200,GO:0005737,GO:0005525,	0	tbb3_aneph ame: full=tubulin beta-3 chain ame: full=beta-3-tubulin
02-30_47-aMSMS-6550.3298.3303.3.pkl	47.83	23	12	0	1	23	3265	3333	0.71	28.9	GO:0010103,GO:0000186,GO:0032440,GO:0007169,GO:0006468,GO:0000165,GO:0006486,GO:0016021,GO:0004709,GO:0055114,GO:0002237,GO:0005886,GO:0005524,GO:0048443,	EC:2.7.11.25,EC:1.3.1.74,EC:2.7.11,	probable leucine-rich repeat receptor-like protein kinase at2g33170-like
02-30_47-aMSMS-6550.3298.3303.3.pkl	39.13	23	14	0	1	23	3784	3852	0.88	28.5	GO:0016021,GO:0006468,GO:0004674,GO:0004888,GO:0009611,GO:0007169,GO:0016491,GO:0005524,GO:0001653,GO:0031347,GO:0005886,	EC:2.7.11,	tyrosine-sulfated glycopeptide receptor 1-like
02-30_47-aMSMS-6550.2565.2565.2.pkl	100	13	0	0	1	13	572	534	0.022	32.7	GO:0044237,GO:0048040,GO:0050662,	EC:4.1.1.35,	udp-glucuronic acid decarboxylase 1
02-30_47-aMSMS-6550.1970.1973.3.pkl	82.35	17	3	0	1	17	1480	1430	0.008	34.3	GO:0005829,GO:0048040,GO:0000139,GO:0042732,GO:0019305,GO:0005768,GO:0005774,GO:0005802,GO:0050662,GO:0005886,GO:0008460,	EC:4.2.1.46,EC:4.1.1.35,	udp-glucuronic acid decarboxylase 2
02-30_47-aMSMS-6550.3298.3303.3.pkl	52.17	23	11	0	1	23	1012	944	1	28.5	GO:0010103,GO:0009960,GO:0006499,GO:0010363,GO:0032440,GO:0006612,GO:0043069,GO:0046777,GO:0007169,GO:0004674,GO:0070825,GO:0009845,GO:0016021,GO:0055114,GO:0008233,GO:0002237,GO:0005886,GO:0005524,GO:0006979,GO:0048443,GO:0009627,	EC:1.3.1.74,EC:2.7.11,	receptor-like protein kinase haiku2
02-30_47-aMSMS-6550.3079.3086.3.pkl	92	25	2	0	1	25	4873	4799	8e-07	46.6	GO:0004743,GO:0046686,GO:0005886,GO:0016310,GO:0030955,GO:0000287,GO:0006096,GO:0005829,	EC:2.7.1.40,	pyruvate cytosolic isozyme-like
02-30_47-aMSMS-6550.3298.3303.3.pkl	47.62	21	11	0	3	23	3	65	0.69	28.9	GO:0010363,GO:0002679,GO:0010200,GO:0002229,GO:0032440,GO:0006612,GO:0050832,GO:0042742,GO:0043069,GO:0046982,GO:0006468,GO:0004674,GO:0043234,GO:0009742,GO:0016021,GO:0008219,GO:0004714,GO:0005768,GO:0055114,GO:0016049,GO:0033612,GO:0009863,GO:0005886,GO:0030968,GO:0005524,	EC:2.7.10.1,EC:1.3.1.74,EC:2.7.11,	brassinosteroid insensitive 1-associated receptor kinase 1
02-30_47-aMSMS-6550.2949.2953.3.pkl	80	20	4	0	1	20	757	816	0.002	36.2	GO:0003677,GO:0046983,GO:0005634,	0	protein dimerization
02-30_47-aMSMS-6550.3298.3303.3.pkl	47.83	23	12	0	1	23	2044	1976	0.37	29.6	GO:0016491,GO:0016310,GO:0004672,GO:0016020,GO:0000166,	0	receptor-like protein kinase hsl1-like
02-30_47-aMSMS-6550.2379.2383.3.pkl	55.56	18	8	0	1	18	1238	1185	1.5	27.3	GO:0016621,GO:0019761,GO:0045552,GO:0009809,GO:0050662,GO:0005829,GO:0055114,	EC:1.2.1.44,EC:1.1.1.219,	cinnamoyl- reductase
02-30_47-aMSMS-6550.2541.2541.2.pkl	68.75	16	5	0	1	16	447	400	0.086	31.2	GO:0019684,GO:0006563,GO:0009750,GO:0009853,GO:0009749,GO:0048046,GO:0005515,GO:0008270,GO:0010319,GO:0009697,GO:0004372,GO:0022626,GO:0008168,GO:0005759,GO:0042742,GO:0035999,GO:0009744,GO:0050897,GO:0005747,GO:0009570,GO:0030170,GO:0009814,GO:0032259,GO:0046686,GO:0009416,GO:0009409,GO:0009626,GO:0009534,GO:0005886,GO:0008266,GO:0005634,GO:0019464,GO:0007623,	EC:2.1.2.1,	serine hydroxymethyltransferase
02-30_47-aMSMS-6550.3298.3303.3.pkl	60.87	23	9	0	1	23	997	929	0.003	35.8	GO:0016021,GO:0006468,GO:0004674,GO:0010075,GO:0016023,GO:0005524,GO:0048653,GO:0007020,GO:0005576,GO:0004715,GO:0005886,	EC:2.7.10.2,EC:2.7.11,	leucine-rich repeat receptor-like kinase
02-30_47-aMSMS-6550.2565.2565.2.pkl	100	14	0	0	1	14	683	642	0.004	35	GO:0048040,GO:0009750,GO:0009744,GO:0042732,GO:0005886,GO:0009749,GO:0009225,GO:0050662,GO:0005829,	EC:4.1.1.35,	udp-xyl synthase 5
02-30_47-aMSMS-6550.3298.3303.3.pkl	60.87	23	9	0	1	23	1060	992	8e-04	37.4	GO:0005886,GO:0006468,GO:0005524,GO:0016021,GO:0004674,GO:0005739,	EC:2.7.11,	probable lrr receptor-like serine threonine-protein kinase at5g10290-like
02-30_47-aMSMS-6550.1970.1973.3.pkl	82.35	17	3	0	1	17	1063	1013	0.007	34.3	GO:0005829,GO:0048040,GO:0000139,GO:0042732,GO:0019305,GO:0005768,GO:0005774,GO:0005802,GO:0050662,GO:0005886,GO:0008460,	EC:4.2.1.46,EC:4.1.1.35,	udp-glucuronic acid decarboxylase 2
02-30_47-aMSMS-6550.3079.3086.3.pkl	92	25	2	0	1	25	1396	1470	6e-07	46.6	GO:0004743,GO:0046686,GO:0005886,GO:0016310,GO:0030955,GO:0000287,GO:0006096,GO:0005829,	EC:2.7.1.40,	pyruvate cytosolic isozyme-like
02-30_47-aMSMS-6550.2565.2565.2.pkl	100	13	0	0	1	13	572	534	0.022	32.7	GO:0044237,GO:0048040,GO:0050662,	EC:4.1.1.35,	udp-glucuronic acid decarboxylase 1
02-30_47-aMSMS-6550.0829.0836.2.pkl	100	9	0	0	1	9	86	60	4.2	23.5	GO:0005874,GO:0051258,GO:0006184,GO:0007017,GO:0003924,GO:0005200,GO:0005737,GO:0005525,	0	beta- partial
02-30_47-aMSMS-6550.3298.3303.3.pkl	47.83	23	12	0	1	23	2575	2643	0.58	28.9	GO:0004672,GO:0006468,GO:0005524,	0	probable lrr receptor-like serine threonine-protein kinase at2g16250-like
02-30_47-aMSMS-6550.2541.2541.2.pkl	68.75	16	5	0	1	16	727	774	0.15	30.4	GO:0006563,GO:0019684,GO:0009853,GO:0048046,GO:0005515,GO:0010319,GO:0009697,GO:0004372,GO:0022626,GO:0008168,GO:0005759,GO:0042742,GO:0035999,GO:0009570,GO:0030170,GO:0009814,GO:0032259,GO:0009416,GO:0046686,GO:0009409,GO:0009626,GO:0009534,GO:0005886,GO:0008266,GO:0005634,GO:0019464,GO:0007623,	EC:2.1.2.1,	glycine hydroxymethyltransferase
02-30_47-aMSMS-6550.1970.1973.3.pkl	100	17	0	0	1	17	2320	2270	0.001	37	GO:0048040,GO:0009750,GO:0009744,GO:0042732,GO:0005886,GO:0009749,GO:0009225,GO:0050662,GO:0005829,	EC:4.1.1.35,	udp-xyl synthase 5
02-30_47-aMSMS-6550.1970.1973.3.pkl	80	15	3	0	1	15	851	895	0.57	28.9	GO:0052542,GO:0006012,GO:0035556,GO:0009723,GO:0050373,GO:0009738,GO:0003978,GO:0050662,GO:0009225,GO:0009832,GO:0019567,GO:0005794,GO:0006865,	EC:5.1.3.2,EC:5.1.3.5,	udp-arabinose 4-epimerase
02-30_47-aMSMS-6550.3298.3303.3.pkl	39.13	23	14	0	1	23	3852	3920	0.8	28.5	GO:0016021,GO:0006468,GO:0055114,GO:0004674,GO:0004888,GO:0009611,GO:0007169,GO:0005524,GO:0001653,GO:0032440,GO:0031347,GO:0004721,GO:0005886,	EC:3.1.3.16,EC:1.3.1.74,EC:2.7.11,	phytosulfokine receptor
02-30_47-aMSMS-6550.1970.1973.3.pkl	58.82	17	7	0	1	17	892	942	1.6	27.3	GO:0008460,GO:0010253,GO:0010489,GO:0009507,GO:0045226,GO:0010214,GO:0009744,GO:0050377,GO:0005829,GO:0051555,GO:0050662,GO:0010224,GO:0010315,GO:0010192,GO:0008831,GO:0010490,GO:0009506,GO:0010280,	EC:4.2.1.46,EC:1.1.1.133,EC:4.2.1.76,	udp-glucose -dehydratase
02-30_47-aMSMS-6550.3426.3430.0.pkl	56	25	11	0	2	26	453	379	0.006	34.7	GO:0046685,GO:0042344,GO:0015700,GO:0009697,GO:0048037,GO:0005507,GO:0010363,GO:0010200,GO:0034976,GO:0031348,GO:0046870,GO:0050832,GO:0043069,GO:0005829,GO:0009867,GO:0019684,GO:0009626,GO:0009595,GO:0042742,GO:0006612,GO:0046482,GO:0010310,GO:0071992,GO:0046938,GO:0016756,GO:0052544,GO:0008270,GO:0009862,GO:0015446,GO:0010337,GO:0046029,GO:0046686,GO:0009409,GO:0009809,GO:0000165,GO:0006635,GO:…	EC:1.1.1.255,EC:2.3.2.15,EC:3.6.3.16,	cinnamyl alcohol dehydrogenase
02-30_47-aMSMS-6550.1970.1973.3.pkl	58.82	17	7	0	1	17	419	469	1.6	27.3	GO:0008460,GO:0010253,GO:0010489,GO:0009507,GO:0045226,GO:0010214,GO:0009744,GO:0050377,GO:0005829,GO:0051555,GO:0050662,GO:0010224,GO:0010315,GO:0010192,GO:0008831,GO:0010490,GO:0009506,GO:0010280,	EC:4.2.1.46,EC:1.1.1.133,EC:4.2.1.76,	udp-glucose -dehydratase
02-30_47-aMSMS-6550.0829.0836.2.pkl	100	9	0	0	1	9	88	62	4.2	23.5	GO:0005874,GO:0051258,GO:0006184,GO:0007017,GO:0003924,GO:0005200,GO:0005737,GO:0005525,	0	beta- partial
02-30_47-aMSMS-6550.1970.1973.3.pkl	84.62	13	2	0	1	13	1355	1317	0.64	28.5	GO:0009684,GO:0050379,GO:0050378,GO:0005975,GO:0005768,GO:0005515,GO:0006569,GO:0005802,GO:0050662,GO:0009225,GO:0005794,	EC:5.1.3.12,EC:5.1.3.6,	udp-d-glucuronic acid 4-epimerase
02-30_47-aMSMS-6550.1970.1973.3.pkl	80	15	3	0	1	15	851	895	0.55	28.9	GO:0052542,GO:0006012,GO:0035556,GO:0009723,GO:0050373,GO:0009738,GO:0003978,GO:0050662,GO:0009225,GO:0009832,GO:0019567,GO:0005794,GO:0006865,	EC:5.1.3.2,EC:5.1.3.5,	udp-arabinose 4-epimerase
02-30_47-aMSMS-6550.2565.2565.2.pkl	100	13	0	0	1	13	596	558	0.019	32.7	GO:0044237,GO:0048040,GO:0050662,	EC:4.1.1.35,	udp-glucuronic acid decarboxylase 1
02-30_47-aMSMS-6550.3426.3430.0.pkl	53.85	26	12	0	1	26	154	77	0.052	31.6	GO:0016491,GO:0000166,GO:0055114,GO:0008270,	0	cinnamyl alcohol dehydrogenase
02-30_47-aMSMS-6550.1970.1973.3.pkl	71.43	14	4	0	1	14	2153	2112	0.82	28.1	GO:0050379,GO:0005768,GO:0005975,GO:0005794,GO:0009225,GO:0050662,GO:0050378,GO:0005802,	EC:5.1.3.12,EC:5.1.3.6,	protein
02-30_47-aMSMS-6550.2059.2063.4.pkl	86.36	22	3	0	1	22	614	549	7e-05	40	GO:0080167,	0	gamma-glutamylcyclotransferase at3g02910-like
02-30_47-aMSMS-6550.3079.3086.3.pkl	56.52	23	10	0	1	23	861	793	1.5	27.7	GO:0005829,GO:0006633,GO:0030955,GO:0010431,GO:0005739,GO:0004743,GO:0000287,GO:0006096,GO:0016310,GO:0009570,GO:0046686,	EC:2.7.1.40,	pyruvate kinase
02-30_47-aMSMS-6550.1970.1973.3.pkl	88.24	17	2	0	1	17	1403	1353	0.002	36.2	GO:0005768,GO:0048040,GO:0042732,GO:0005794,GO:0005886,GO:0009225,GO:0050662,GO:0005802,	EC:4.1.1.35,	udp-glucuronic acid decarboxylase 1
02-30_47-aMSMS-6550.1931.1934.2.pkl	100	12	0	0	1	12	357	392	2.5	26.2	GO:0016157,GO:0009058,GO:0005985,	EC:2.4.1.13,	sucrose synthase sus1
02-30_47-aMSMS-6550.3079.3086.3.pkl	73.91	23	6	0	1	23	1183	1251	0.005	35	GO:0005829,GO:0010498,GO:0030955,GO:0007010,GO:0005524,GO:0004743,GO:0000287,GO:0006096,GO:0016310,GO:0006094,GO:0006865,	EC:2.7.1.40,	pyruvate kinase
02-30_47-aMSMS-6550.1376.1381.2.pkl	100	10	0	0	1	10	49	20	1.2	25.4	GO:0005874,GO:0051258,GO:0006184,GO:0007017,GO:0003924,GO:0005200,GO:0005737,GO:0005525,	0	tbb3_aneph ame: full=tubulin beta-3 chain ame: full=beta-3-tubulin
02-30_47-aMSMS-6550.3426.3430.0.pkl	100	26	0	0	1	26	490	413	2e-10	56.2	GO:0045551,GO:0052747,GO:0009809,GO:0008270,GO:0055114,	EC:1.1.1.195,	cinnamyl alcohol dehydrogenase
02-30_47-aMSMS-6550.1376.1381.2.pkl	100	10	0	0	1	10	31	60	1.9	24.6	GO:0005874,GO:0051258,GO:0006184,GO:0007017,GO:0003924,GO:0005200,GO:0005737,GO:0005525,	0	beta- partial
02-30_47-aMSMS-6550.1970.1973.3.pkl	84.62	13	2	0	1	13	1286	1248	0.43	29.3	GO:0052542,GO:0006012,GO:0035556,GO:0009723,GO:0050373,GO:0009738,GO:0003978,GO:0050662,GO:0009225,GO:0009832,GO:0019567,GO:0005794,GO:0006865,	EC:5.1.3.2,EC:5.1.3.5,	udp-d-xylose 4-epimerase
02-30_47-aMSMS-6550.1970.1973.3.pkl	58.82	17	7	0	1	17	2785	2735	1.7	27.3	GO:0008460,GO:0010253,GO:0010489,GO:0009507,GO:0045226,GO:0010214,GO:0009744,GO:0050377,GO:0005829,GO:0051555,GO:0050662,GO:0010224,GO:0010315,GO:0010192,GO:0008831,GO:0010490,GO:0009506,GO:0010280,	EC:4.2.1.46,EC:1.1.1.133,EC:4.2.1.76,	udp-glucose -dehydratase
02-30_47-aMSMS-6550.1868.1868.3.pkl	100	15	0	0	1	15	130	174	0.009	31.6	GO:0042409,GO:0046872,GO:0009809,GO:0032259,	EC:2.1.1.104,	caffeoyl o- partial
02-30_47-aMSMS-6550.1786.1790.2.pkl	100	11	0	0	1	11	1078	1046	8.3	25	GO:0001666,GO:0009011,GO:0010264,GO:0009501,GO:0019375,GO:0019252,GO:0033840,GO:0009507,	EC:2.4.1.242,EC:2.4.1.21,	granule-bound starch synthase
02-30_47-aMSMS-6550.2541.2541.2.pkl	80	15	3	0	1	15	1942	1898	0.007	34.3	GO:0005737,GO:0030170,GO:0006563,GO:0046686,GO:0035999,GO:0032259,GO:0008168,GO:0004372,GO:0006544,	EC:2.1.2.1,	serine hydroxymethyltransferase 1-like
02-30_47-aMSMS-6550.3298.3303.3.pkl	47.83	23	12	0	1	23	2617	2685	0.28	30	GO:0000166,GO:0010363,GO:0002679,GO:0010200,GO:0016491,GO:0006612,GO:0016310,GO:0043069,GO:0004674,GO:0052542,GO:0009738,GO:0009723,GO:0005886,GO:0035556,	EC:2.7.11,	receptor-like protein kinase hsl1-like
02-30_47-aMSMS-6550.2541.2541.2.pkl	80	15	3	0	1	15	1942	1898	0.009	34.3	GO:0005737,GO:0030170,GO:0006563,GO:0046686,GO:0035999,GO:0032259,GO:0008168,GO:0004372,GO:0006544,	EC:2.1.2.1,	serine hydroxymethyltransferase 1-like
02-30_47-aMSMS-6550.1970.1973.3.pkl	64.29	14	5	0	1	14	685	726	2.2	26.9	GO:0005975,GO:0005794,GO:0009225,GO:0050662,GO:0016020,GO:0050378,	EC:5.1.3.6,	udp-d-glucuronate 4-epimerase 2
02-30_47-aMSMS-6550.3298.3303.3.pkl	43.48	23	13	0	1	23	874	806	1.1	28.1	GO:0048767,GO:0042803,GO:0000271,GO:0043481,GO:0005496,GO:0009825,GO:0016021,GO:0000186,GO:1900140,GO:0043234,GO:0010584,GO:0048657,GO:0009911,GO:0009729,GO:0010817,GO:0042742,GO:0004709,GO:0010224,GO:0005886,GO:0002237,GO:0048366,GO:0010268,GO:0005524,GO:0060548,GO:0046982,GO:0004721,GO:0009932,GO:0009742,GO:0000165,GO:0006468,GO:0005768,GO:0010103,GO:0071555,	EC:2.7.11.25,EC:3.1.3.16,EC:2.7.11,	brassinosteroid receptor
02-30_47-aMSMS-6550.3298.3303.3.pkl	47.83	23	12	0	1	23	1503	1435	0.61	28.9	GO:0006468,GO:0004672,GO:0009506,GO:0048367,GO:0009505,GO:0005524,GO:0048513,GO:0009791,GO:0007165,GO:0005886,	0	probable lrr receptor-like serine threonine-protein kinase at2g16250-like
02-30_47-aMSMS-6550.2379.2383.3.pkl	55.56	18	8	0	1	18	200	253	4.3	26.2	GO:0016621,GO:0019761,GO:0045552,GO:0009809,GO:0050662,GO:0005829,GO:0055114,	EC:1.2.1.44,EC:1.1.1.219,	cinnamoyl- reductase
02-30_47-aMSMS-6550.2565.2565.2.pkl	100	14	0	0	1	14	874	915	0.003	35	GO:0048040,GO:0009750,GO:0009744,GO:0042732,GO:0005886,GO:0009749,GO:0009225,GO:0050662,GO:0005829,	EC:4.1.1.35,	udp-xyl synthase 6
02-30_47-aMSMS-6550.3298.3303.3.pkl	47.83	23	12	0	1	23	3265	3333	0.6	28.9	GO:0010103,GO:0000186,GO:0032440,GO:0007169,GO:0006468,GO:0000165,GO:0006486,GO:0016021,GO:0004709,GO:0055114,GO:0002237,GO:0005886,GO:0005524,GO:0048443,	EC:2.7.11.25,EC:1.3.1.74,EC:2.7.11,	protein
02-30_47-aMSMS-6550.1970.1973.3.pkl	80	15	3	0	1	15	851	895	0.57	28.9	GO:0048868,GO:0052542,GO:0006012,GO:0035556,GO:0009723,GO:0050373,GO:0009738,GO:0003978,GO:0050662,GO:0009225,GO:0009832,GO:0019567,GO:0005794,GO:0009793,	EC:5.1.3.2,EC:5.1.3.5,	udp-arabinose 4-epimerase
02-30_47-aMSMS-6550.1970.1973.3.pkl	86.67	15	2	0	1	15	365	409	0.067	31.6	GO:0005829,GO:0033358,GO:0050373,GO:0045227,GO:0009555,GO:0046983,GO:0003978,GO:0050662,GO:0005794,GO:0005886,GO:0046369,	EC:5.1.3.2,EC:5.1.3.5,	udp-glucose 4-epimerase
02-30_47-aMSMS-6550.3426.3430.0.pkl	56	25	11	0	2	26	647	573	0.017	33.5	GO:0046685,GO:0042344,GO:0015700,GO:0009697,GO:0048037,GO:0005507,GO:0010363,GO:0010200,GO:0034976,GO:0031348,GO:0046870,GO:0050832,GO:0043069,GO:0005829,GO:0009867,GO:0019684,GO:0009626,GO:0009595,GO:0042742,GO:0006612,GO:0046482,GO:0010310,GO:0071992,GO:0046938,GO:0016756,GO:0052544,GO:0008270,GO:0009862,GO:0015446,GO:0010337,GO:0046029,GO:0046686,GO:0009409,GO:0009809,GO:0000165,GO:0006635,GO:…	EC:1.1.1.255,EC:2.3.2.15,EC:3.6.3.16,	cinnamyl alcohol dehydrogenase
02-30_47-aMSMS-6550.1970.1973.3.pkl	82.35	17	3	0	1	17	1721	1671	0.003	35.8	GO:0005829,GO:0048040,GO:0000139,GO:0042732,GO:0019305,GO:0005768,GO:0005774,GO:0005802,GO:0050662,GO:0005886,GO:0008460,	EC:4.2.1.46,EC:4.1.1.35,	udp-glucuronic acid decarboxylase 1-like
02-30_47-aMSMS-6550.1868.1868.3.pkl	80	20	4	0	1	20	189	248	9e-04	37	GO:0042409,GO:0003676,GO:0032259,GO:0005829,GO:0015074,	EC:2.1.1.104,	caffeoyl- o-methyltransferase
02-30_47-aMSMS-6550.1970.1973.3.pkl	64.29	14	5	0	1	14	287	328	8.9	25	GO:0016021,GO:0008270,GO:0048364,GO:0005739,GO:0010264,GO:0051301,GO:0004842,GO:0016567,GO:0050662,GO:0005886,	EC:6.3.2.19,	nad dependent epimerase dehydratase family protein
02-30_47-aMSMS-6550.1970.1973.3.pkl	82.35	17	3	0	1	17	1498	1448	0.007	34.3	GO:0005829,GO:0048040,GO:0000139,GO:0042732,GO:0019305,GO:0005768,GO:0005774,GO:0005802,GO:0050662,GO:0005886,GO:0008460,	EC:4.2.1.46,EC:4.1.1.35,	udp-glucuronic acid decarboxylase 1-like
02-30_47-aMSMS-6550.1376.1381.2.pkl	100	10	0	0	1	10	49	20	1.2	25.4	GO:0005874,GO:0051258,GO:0006184,GO:0007017,GO:0003924,GO:0005200,GO:0005737,GO:0005525,	0	tbb3_aneph ame: full=tubulin beta-3 chain ame: full=beta-3-tubulin
02-30_47-aMSMS-6550.3426.3430.0.pkl	53.85	26	12	0	1	26	154	77	0.052	31.6	GO:0016491,GO:0000166,GO:0055114,GO:0008270,	0	cinnamyl alcohol dehydrogenase
02-30_47-aMSMS-6550.2565.2565.2.pkl	100	14	0	0	1	14	1220	1261	0.004	35	GO:0048040,GO:0009750,GO:0009744,GO:0042732,GO:0005886,GO:0009749,GO:0009225,GO:0050662,GO:0005829,	EC:4.1.1.35,	udp-xyl synthase 6
02-30_47-aMSMS-6550.3079.3086.3.pkl	63.16	19	7	0	5	23	930	874	0.31	29.6	GO:0005829,GO:0030955,GO:0005524,GO:0004743,GO:0000023,GO:0019252,GO:0000287,GO:0006096,GO:0016310,GO:0046686,GO:0019761,GO:0043085,GO:0005886,	EC:2.7.1.40,	pyruvate kinase
02-30_47-aMSMS-6550.3079.3086.3.pkl	63.16	19	7	0	5	23	930	874	0.31	29.6	GO:0005829,GO:0030955,GO:0005524,GO:0004743,GO:0000023,GO:0019252,GO:0000287,GO:0006096,GO:0016310,GO:0046686,GO:0019761,GO:0043085,GO:0005886,	EC:2.7.1.40,	pyruvate kinase
02-30_47-aMSMS-6550.3079.3086.3.pkl	92	25	2	0	1	25	1681	1755	8e-07	46.6	GO:0004743,GO:0046686,GO:0016310,GO:0030955,GO:0000287,GO:0006096,GO:0016020,GO:0005829,	EC:2.7.1.40,	pyruvate cytosolic isozyme-like
02-30_47-aMSMS-6550.2565.2565.2.pkl	100	14	0	0	1	14	683	642	0.004	35	GO:0048040,GO:0009750,GO:0009744,GO:0042732,GO:0005886,GO:0009749,GO:0009225,GO:0050662,GO:0005829,	EC:4.1.1.35,	udp-xyl synthase 5
02-30_47-aMSMS-6550.2379.2383.3.pkl	70.59	17	5	0	1	17	217	267	0.27	30	GO:0006468,GO:0009553,GO:0080008,GO:0016905,GO:0051604,GO:0004713,GO:0005524,GO:0042254,GO:0005634,	EC:2.7.11.7,EC:2.7.10,	notchless protein homolog
02-30_47-aMSMS-6550.1868.1868.3.pkl	80	20	4	0	1	20	189	248	0.001	37	GO:0042409,GO:0046872,GO:0003676,GO:0032259,GO:0005829,GO:0015074,	EC:2.1.1.104,	caffeoyl- o-methyltransferase
02-30_47-aMSMS-6550.1970.1973.3.pkl	82.35	17	3	0	1	17	1498	1448	0.007	34.3	GO:0005829,GO:0048040,GO:0000139,GO:0042732,GO:0019305,GO:0005768,GO:0005774,GO:0005802,GO:0050662,GO:0005886,GO:0008460,	EC:4.2.1.46,EC:4.1.1.35,	udp-glucuronic acid decarboxylase 1-like
02-30_47-aMSMS-6550.3298.3303.3.pkl	52.17	23	11	0	1	23	892	824	0.12	31.2	GO:0016021,GO:0006468,GO:0055114,GO:0004674,GO:0009611,GO:0007169,GO:0016023,GO:0005524,GO:0001653,GO:0032440,GO:0009507,GO:0004721,GO:0005886,	EC:3.1.3.16,EC:1.3.1.74,EC:2.7.11,	phytosulfokine receptor 2-like
02-30_47-aMSMS-6550.3079.3086.3.pkl	73.91	23	6	0	1	23	784	716	0.002	36.6	GO:0010498,GO:0030955,GO:0005739,GO:0007010,GO:0005524,GO:0004743,GO:0000287,GO:0006096,GO:0016310,GO:0006094,	EC:2.7.1.40,	pyruvate kinase
02-30_47-aMSMS-6550.2379.2383.3.pkl	55.56	18	8	0	1	18	1238	1185	1.5	27.3	GO:0016621,GO:0019761,GO:0045552,GO:0009809,GO:0050662,GO:0005829,GO:0055114,	EC:1.2.1.44,EC:1.1.1.219,	cinnamoyl- reductase
02-30_47-aMSMS-6550.3298.3303.3.pkl	43.48	23	13	0	1	23	879	811	0.75	28.9	GO:0010103,GO:0016023,GO:0000186,GO:0032440,GO:0007169,GO:0006468,GO:0000165,GO:0016021,GO:0004709,GO:0055114,GO:0002237,GO:0005886,GO:0005524,GO:0048443,	EC:2.7.11.25,EC:1.3.1.74,EC:2.7.11,	leucine-rich receptor-like protein kinase
02-30_47-aMSMS-6550.3298.3303.3.pkl	47.83	23	12	0	1	23	3546	3614	0.86	28.5	GO:0010103,GO:0000186,GO:0032440,GO:0007169,GO:0006468,GO:0000165,GO:0006486,GO:0016021,GO:0004709,GO:0055114,GO:0002237,GO:0005886,GO:0005524,GO:0048443,	EC:2.7.11.25,EC:1.3.1.74,EC:2.7.11,	leucine-rich repeat receptor-like protein kinase
02-30_47-aMSMS-6550.1970.1973.3.pkl	84.62	13	2	0	1	13	1376	1338	0.65	28.5	GO:0009684,GO:0050379,GO:0050378,GO:0005739,GO:0005975,GO:0005768,GO:0006569,GO:0005802,GO:0050662,GO:0009225,GO:0005794,	EC:5.1.3.12,EC:5.1.3.6,	udp-d-glucuronic acid 4-epimerase
02-30_47-aMSMS-6550.3079.3086.3.pkl	73.91	23	6	0	1	23	1419	1487	0.002	36.6	GO:0010498,GO:0030955,GO:0005739,GO:0007010,GO:0005524,GO:0004743,GO:0000287,GO:0006096,GO:0016310,GO:0006094,	EC:2.7.1.40,	pyruvate kinase
02-30_47-aMSMS-6550.1970.1973.3.pkl	71.43	14	4	0	1	14	449	490	3.8	26.2	GO:0050378,GO:0005975,GO:0005768,GO:0019375,GO:0042631,GO:0005802,GO:0050662,GO:0009225,GO:0016036,GO:0016020,GO:0005794,	EC:5.1.3.6,	nucleotide sugar epimerase
02-30_47-aMSMS-6550.1970.1973.3.pkl	64.29	14	5	0	1	14	1741	1700	2.2	26.9	GO:0005794,GO:0009225,GO:0050662,GO:0016020,GO:0050378,GO:0005982,GO:0005985,	EC:5.1.3.6,	udp-d-glucuronate 4-epimerase 2
02-30_47-aMSMS-6550.2565.2565.2.pkl	100	13	0	0	1	13	596	558	0.022	32.7	GO:0044237,GO:0048040,GO:0050662,	EC:4.1.1.35,	udp-glucuronic acid decarboxylase 1
02-30_47-aMSMS-6550.3079.3086.3.pkl	92	25	2	0	1	25	1331	1405	1e-06	46.2	GO:0004743,GO:0016310,GO:0030955,GO:0000287,GO:0006096,	EC:2.7.1.40,	pyruvate cytosolic isozyme-like
02-30_47-aMSMS-6550.2586.2591.2.pkl	100	14	0	0	1	14	544	503	0.78	27.7	GO:0005874,GO:0051258,GO:0006184,GO:0007017,GO:0003924,GO:0005200,GO:0005525,	0	alpha- partial
02-30_47-aMSMS-6550.1970.1973.3.pkl	82.35	17	3	0	1	17	1480	1430	0.008	34.3	GO:0005829,GO:0048040,GO:0000139,GO:0042732,GO:0019305,GO:0005768,GO:0005774,GO:0005802,GO:0050662,GO:0005886,GO:0008460,	EC:4.2.1.46,EC:4.1.1.35,	udp-glucuronic acid decarboxylase 2
02-30_47-aMSMS-6550.1764.1764.2.pkl	100	18	0	0	1	18	1354	1301	5e-04	37.7	GO:0004001,GO:0006166,GO:0016773,GO:0006167,GO:0016310,	EC:2.7.1.20,	adenosine kinase
02-30_47-aMSMS-6550.2379.2383.3.pkl	70.59	17	5	0	1	17	217	267	0.27	30	GO:0006468,GO:0009553,GO:0080008,GO:0016905,GO:0051604,GO:0004713,GO:0005524,GO:0042254,GO:0005634,	EC:2.7.11.7,EC:2.7.10,	notchless protein homolog
02-30_47-aMSMS-6550.3079.3086.3.pkl	92	25	2	0	1	25	1539	1613	7e-07	46.6	GO:0004743,GO:0046686,GO:0005886,GO:0016310,GO:0030955,GO:0000287,GO:0006096,GO:0005829,	EC:2.7.1.40,	pyruvate cytosolic isozyme-like
02-30_47-aMSMS-6550.3298.3303.3.pkl	56.52	23	10	0	1	23	966	898	0.034	32.7	GO:0010103,GO:0009960,GO:0006499,GO:0010363,GO:0032440,GO:0006612,GO:0043069,GO:0046777,GO:0007169,GO:0004674,GO:0070825,GO:0009845,GO:0016021,GO:0004714,GO:0055114,GO:0008233,GO:0002237,GO:0005886,GO:0005524,GO:0006979,GO:0048443,GO:0009627,	EC:2.7.10.1,EC:1.3.1.74,EC:2.7.11,	receptor-like protein kinase haiku2
02-30_47-aMSMS-6550.2541.2541.2.pkl	75	16	4	0	1	16	1511	1464	0.012	33.5	GO:0005829,GO:0006164,GO:0006544,GO:0032259,GO:0035999,GO:0004372,GO:0009570,GO:0006563,GO:0030170,GO:0008168,	EC:2.1.2.1,	serine hydroxymethyltransferase 3
02-30_47-aMSMS-6550.2565.2565.2.pkl	100	14	0	0	1	14	900	859	0.003	35	GO:0048040,GO:0009750,GO:0009744,GO:0042732,GO:0005886,GO:0009749,GO:0009225,GO:0050662,GO:0005829,	EC:4.1.1.35,	udp-xyl synthase 5
02-30_47-aMSMS-6550.3298.3303.3.pkl	60.87	23	9	0	1	23	997	929	0.003	35.8	GO:0016021,GO:0006468,GO:0004674,GO:0010075,GO:0016023,GO:0005524,GO:0048653,GO:0007020,GO:0005576,GO:0004715,GO:0005886,	EC:2.7.10.2,EC:2.7.11,	leucine-rich repeat receptor-like kinase
02-30_47-aMSMS-6550.3298.3303.3.pkl	43.48	23	13	0	1	23	3164	3232	0.99	28.5	GO:0004707,GO:0016021,GO:0006468,GO:0055114,GO:0010103,GO:0007169,GO:0016023,GO:0005524,GO:0048443,GO:0002237,GO:0032440,GO:0010067,GO:0005886,GO:0000165,	EC:2.7.11.24,EC:1.3.1.74,	leucine-rich repeat receptor-like protein kinase pxl2-like
02-30_47-aMSMS-6550.3298.3303.3.pkl	47.83	23	12	0	1	23	3739	3671	0.98	28.5	GO:0010103,GO:0000186,GO:0032440,GO:0007169,GO:0006468,GO:0000165,GO:0006486,GO:0016021,GO:0004709,GO:0055114,GO:0002237,GO:0005886,GO:0005524,GO:0048443,GO:0005739,	EC:2.7.11.25,EC:1.3.1.74,EC:2.7.11,	protein
02-30_47-aMSMS-6550.1970.1973.3.pkl	64.29	14	5	0	1	14	1190	1149	9.5	25	GO:0005886,GO:0016567,GO:0048364,GO:0004842,GO:0016021,GO:0050662,GO:0008270,GO:0005739,GO:0051301,	EC:6.3.2.19,	protein
02-30_47-aMSMS-6550.1970.1973.3.pkl	82.35	17	3	0	1	17	1063	1013	0.007	34.3	GO:0005829,GO:0048040,GO:0000139,GO:0042732,GO:0019305,GO:0005768,GO:0005774,GO:0005802,GO:0050662,GO:0005886,GO:0008460,	EC:4.2.1.46,EC:4.1.1.35,	udp-glucuronic acid decarboxylase 2
02-30_47-aMSMS-6550.3426.3430.0.pkl	50	26	13	0	1	26	111	34	1	27.7	GO:0046029,GO:0000166,GO:0055114,GO:0008270,	EC:1.1.1.255,	probable mannitol dehydrogenase-like
02-30_47-aMSMS-6550.1970.1973.3.pkl	82.35	17	3	0	1	17	1721	1671	0.003	35.8	GO:0005829,GO:0048040,GO:0000139,GO:0042732,GO:0019305,GO:0005768,GO:0005774,GO:0005802,GO:0050662,GO:0005886,GO:0008460,	EC:4.2.1.46,EC:4.1.1.35,	udp-glucuronic acid decarboxylase 1-like
02-30_47-aMSMS-6550.2586.2591.2.pkl	100	14	0	0	1	14	544	503	0.78	27.7	GO:0005874,GO:0051258,GO:0006184,GO:0007017,GO:0003924,GO:0005200,GO:0005525,	0	alpha- partial
02-30_47-aMSMS-6550.2541.2541.2.pkl	68.75	16	5	0	1	16	429	476	0.11	30.8	GO:0019684,GO:0006563,GO:0009750,GO:0009853,GO:0009749,GO:0048046,GO:0005515,GO:0008270,GO:0010319,GO:0009697,GO:0004372,GO:0022626,GO:0008168,GO:0005759,GO:0042742,GO:0035999,GO:0009744,GO:0050897,GO:0005747,GO:0009570,GO:0030170,GO:0009814,GO:0032259,GO:0046686,GO:0009416,GO:0009409,GO:0009626,GO:0009534,GO:0005886,GO:0008266,GO:0005634,GO:0019464,GO:0007623,	EC:2.1.2.1,	serine hydroxymethyltransferase 2
02-30_47-aMSMS-6550.3079.3086.3.pkl	92	25	2	0	1	25	1331	1405	1e-06	46.2	GO:0004743,GO:0016310,GO:0030955,GO:0000287,GO:0006096,	EC:2.7.1.40,	pyruvate cytosolic isozyme-like
02-30_47-aMSMS-6550.1868.1868.3.pkl	84.21	19	3	0	2	20	979	923	0.001	37	GO:0042409,GO:0003676,GO:0032259,GO:0005829,GO:0015074,	EC:2.1.1.104,	caffeoyl- o-methyltransferase
02-30_47-aMSMS-6550.3298.3303.3.pkl	52.17	23	11	0	1	23	1769	1837	0.011	34.3	GO:0004715,GO:0006468,GO:0005524,GO:0032440,GO:0016021,GO:0004674,GO:0055114,	EC:2.7.10.2,EC:1.3.1.74,EC:2.7.11,	somatic embryogenesis receptor kinase 1
02-30_47-aMSMS-6550.1970.1973.3.pkl	100	17	0	0	1	17	1022	972	5e-04	37.7	GO:0044237,GO:0048040,GO:0050662,	EC:4.1.1.35,	dtdp-glucose 4-6-
02-30_47-aMSMS-6550.1970.1973.3.pkl	84.62	13	2	0	1	13	1542	1504	0.79	28.1	GO:0003978,GO:0019567,GO:0050662,GO:0016021,GO:0052542,GO:0033358,GO:0032580,GO:0009832,GO:0009738,GO:0050373,GO:0009723,GO:0006012,GO:0045227,GO:0035556,	EC:5.1.3.2,EC:5.1.3.5,	udp-arabinose 4-epimerase
02-30_47-aMSMS-6550.1985.1988.2.pkl	66.67	15	5	0	1	15	1563	1607	4.4	26.2	GO:0009695,GO:0031408,GO:0034440,GO:0016165,GO:0009611,GO:0005886,GO:0005506,GO:0040007,GO:0009507,	EC:1.13.11.12,	protein
02-30_47-aMSMS-6550.3298.3303.3.pkl	47.83	23	12	0	1	23	3606	3674	0.98	28.5	GO:0010103,GO:0000186,GO:0032440,GO:0007169,GO:0006468,GO:0000165,GO:0006486,GO:0016021,GO:0004709,GO:0055114,GO:0002237,GO:0005886,GO:0005524,GO:0048443,GO:0005739,	EC:2.7.11.25,EC:1.3.1.74,EC:2.7.11,	protein
02-30_47-aMSMS-6550.1970.1973.3.pkl	58.82	17	7	0	1	17	2785	2735	1.7	27.3	GO:0008460,GO:0010253,GO:0010489,GO:0009507,GO:0045226,GO:0010214,GO:0009744,GO:0050377,GO:0005829,GO:0051555,GO:0050662,GO:0010224,GO:0010315,GO:0010192,GO:0008831,GO:0010490,GO:0009506,GO:0010280,	EC:4.2.1.46,EC:1.1.1.133,EC:4.2.1.76,	udp-glucose -dehydratase
02-30_47-aMSMS-6550.1970.1973.3.pkl	86.67	15	2	0	1	15	1695	1651	0.2	30	GO:0005794,GO:0005886,GO:0046983,GO:0044237,GO:0042546,GO:0003978,GO:0006012,GO:0050662,GO:0005829,	EC:5.1.3.2,	udp-d-glucose udp-d-galactose 4-epimerase 5
02-30_47-aMSMS-6550.2949.2953.3.pkl	80	20	4	0	1	20	757	816	0.002	36.2	GO:0003677,GO:0046983,GO:0005634,	0	protein dimerization
02-30_47-aMSMS-6550.1970.1973.3.pkl	64.29	14	5	0	1	14	287	328	8.9	25	GO:0016021,GO:0008270,GO:0048364,GO:0005739,GO:0010264,GO:0051301,GO:0004842,GO:0016567,GO:0050662,GO:0005886,	EC:6.3.2.19,	nad dependent epimerase dehydratase family protein

## Sheet: 6 Hours
6 Hours
protein_id	%_identity	alignment_length	mismatches	gap_opens	q._start	q._end	s._start	s._end	e-value	bit_score	GO	EC	Protein name
08-30_47-aMSMS-6550.3419.3423.2.pkl	89.47	19	2	0	1	19	2024	1968	2e-05	42	GO:0005829,GO:0080119,GO:0008270,GO:0030127,GO:0006888,GO:0005215,GO:0008284,GO:0006886,GO:0006487,	0	protein transport protein sec24-like at3g07100-like
08-30_47-aMSMS-6550.2023.2047.3.pkl	73.33	15	4	0	1	15	926	882	1.1	27.7	GO:0010105,GO:0005794,GO:0016021,GO:0005783,GO:0009723,GO:0005739,	0	green ripe-like 1
08-30_47-aMSMS-6550.3419.3423.2.pkl	89.47	19	2	0	1	19	927	871	2e-05	42	GO:0005829,GO:0080119,GO:0008270,GO:0030127,GO:0006888,GO:0005215,GO:0008284,GO:0006886,GO:0006487,	0	protein transport protein sec24-like at3g07100-like
08-30_47-aMSMS-6550.2023.2047.3.pkl	80	15	3	0	1	15	1004	1048	0.32	29.3	GO:0010105,GO:0005794,GO:0016021,GO:0005783,GO:0009723,GO:0005739,	0	green ripe-like 1
08-30_47-aMSMS-6550.3419.3423.2.pkl	70.59	17	5	0	2	18	2240	2190	0.027	32.7	GO:0006979,GO:0005829,GO:0008270,GO:0009651,GO:0009536,GO:0006816,GO:0030127,GO:0007030,GO:0006888,GO:0005215,GO:0006886,	0	protein transport protein
08-30_47-aMSMS-6550.3419.3423.2.pkl	70.59	17	5	0	2	18	1627	1577	0.028	32.7	GO:0006979,GO:0030127,GO:0006886,GO:0006888,GO:0005829,GO:0008270,GO:0009536,GO:0005215,	0	protein transport protein sec24-like at4g32640-like
08-30_47-aMSMS-6550.3100.3102.4.pkl	85.71	14	2	0	16	29	108	67	0.36	27.7	GO:0009615,GO:0005829,GO:0005618,GO:0034976,GO:0005739,GO:0006457,GO:0031625,GO:0009408,GO:0009617,GO:0005774,GO:0005524,GO:0016567,GO:0046686,GO:0009644,GO:0042542,GO:0005794,GO:0005886,GO:0048046,	0	heat shock protein 70
08-30_47-aMSMS-6550.2895.2900.3.pkl	85.71	21	3	0	3	23	710	772	7e-05	40.4	GO:0006097,GO:0030060,GO:0007031,GO:0006108,GO:0031998,GO:0006099,GO:0080093,GO:0006635,GO:0009507,GO:0009514,	EC:1.1.1.37,	malate glyoxysomal
08-30_47-aMSMS-6550.2895.2900.3.pkl	85.71	21	3	0	3	23	710	772	7e-05	40.4	GO:0006097,GO:0030060,GO:0007031,GO:0006108,GO:0031998,GO:0006099,GO:0080093,GO:0006635,GO:0009507,GO:0009514,	EC:1.1.1.37,	malate glyoxysomal
08-30_47-aMSMS-6550.2023.2047.3.pkl	80	15	3	0	1	15	633	677	0.31	29.3	GO:0010105,GO:0005794,GO:0016021,GO:0005783,GO:0009723,GO:0005739,	0	green ripe-like 1
08-30_47-aMSMS-6550.2023.2047.3.pkl	80	15	3	0	1	15	1004	1048	0.32	29.3	GO:0010105,GO:0005794,GO:0016021,GO:0005783,GO:0009723,GO:0005739,	0	green ripe-like 1
08-30_47-aMSMS-6550.2023.2047.3.pkl	80	15	3	0	1	15	1562	1606	0.32	29.3	GO:0010105,GO:0005794,GO:0016021,GO:0005783,GO:0009723,GO:0005739,	0	green ripe-like 1
08-30_47-aMSMS-6550.0518.0524.3.pkl	100	10	0	0	1	10	1897	1868	4.8	25.4	GO:0005774,GO:0031348,GO:0006777,GO:0006457,GO:0009867,GO:0042542,GO:0009862,GO:0016023,GO:0009505,GO:0010363,GO:0006612,GO:0005509,GO:0050832,GO:0009507,GO:0005789,GO:0043069,GO:0005794,GO:0005829,GO:0000165,GO:0009734,GO:0051082,GO:0009644,GO:0016021,GO:0009409,GO:0009408,GO:0009506,GO:0009738,GO:0030151,GO:0005886,GO:0030968,GO:0005739,	0	calnexin homolog
08-30_47-aMSMS-6550.2023.2047.3.pkl	80	15	3	0	1	15	633	677	0.31	29.3	GO:0010105,GO:0005794,GO:0016021,GO:0005783,GO:0009723,GO:0005739,	0	green ripe-like 1
08-30_47-aMSMS-6550.3100.3102.4.pkl	85.71	14	2	0	16	29	108	67	0.36	27.7	GO:0009615,GO:0005829,GO:0005618,GO:0034976,GO:0005739,GO:0006457,GO:0031625,GO:0009408,GO:0009617,GO:0005774,GO:0005524,GO:0016567,GO:0046686,GO:0009644,GO:0042542,GO:0005794,GO:0005886,GO:0048046,	0	heat shock protein 70
08-30_47-aMSMS-6550.2895.2900.3.pkl	85.71	21	3	0	3	23	710	772	7e-05	40.4	GO:0006097,GO:0030060,GO:0007031,GO:0006108,GO:0031998,GO:0006099,GO:0080093,GO:0006635,GO:0009507,GO:0009514,	EC:1.1.1.37,	malate glyoxysomal
08-30_47-aMSMS-6550.2895.2900.3.pkl	85.71	21	3	0	3	23	702	640	7e-05	40.4	GO:0006097,GO:0030060,GO:0007031,GO:0006108,GO:0031998,GO:0006099,GO:0080093,GO:0006635,GO:0009507,GO:0009514,	EC:1.1.1.37,	malate glyoxysomal
08-30_47-aMSMS-6550.0518.0524.3.pkl	100	10	0	0	1	10	1897	1868	4.8	25.4	GO:0005774,GO:0031348,GO:0006777,GO:0006457,GO:0009867,GO:0042542,GO:0009862,GO:0016023,GO:0009505,GO:0010363,GO:0006612,GO:0005509,GO:0050832,GO:0009507,GO:0005789,GO:0043069,GO:0005794,GO:0005829,GO:0000165,GO:0009734,GO:0051082,GO:0009644,GO:0016021,GO:0009409,GO:0009408,GO:0009506,GO:0009738,GO:0030151,GO:0005886,GO:0030968,GO:0005739,	0	calnexin homolog
08-30_47-aMSMS-6550.0518.0524.3.pkl	100	10	0	0	1	10	1897	1868	4.8	25.4	GO:0005774,GO:0031348,GO:0006777,GO:0006457,GO:0009867,GO:0042542,GO:0009862,GO:0016023,GO:0009505,GO:0010363,GO:0006612,GO:0005509,GO:0050832,GO:0009507,GO:0005789,GO:0043069,GO:0005794,GO:0005829,GO:0000165,GO:0009734,GO:0051082,GO:0009644,GO:0016021,GO:0009409,GO:0009408,GO:0009506,GO:0009738,GO:0030151,GO:0005886,GO:0030968,GO:0005739,	0	calnexin homolog
08-30_47-aMSMS-6550.3419.3423.2.pkl	89.47	19	2	0	1	19	2024	1968	2e-05	42	GO:0005829,GO:0080119,GO:0008270,GO:0030127,GO:0006888,GO:0005215,GO:0008284,GO:0006886,GO:0006487,	0	protein transport protein sec24-like at3g07100-like
08-30_47-aMSMS-6550.3419.3423.2.pkl	70.59	17	5	0	2	18	2240	2190	0.027	32.7	GO:0006979,GO:0005829,GO:0008270,GO:0009651,GO:0009536,GO:0006816,GO:0030127,GO:0007030,GO:0006888,GO:0005215,GO:0006886,	0	protein transport protein
08-30_47-aMSMS-6550.0518.0524.3.pkl	100	10	0	0	1	10	254	225	10	24.3	GO:0005774,GO:0031348,GO:0006777,GO:0006457,GO:0009867,GO:0042542,GO:0009862,GO:0016023,GO:0009505,GO:0010363,GO:0006612,GO:0005509,GO:0050832,GO:0009507,GO:0005789,GO:0043069,GO:0005794,GO:0005829,GO:0000165,GO:0009734,GO:0051082,GO:0009644,GO:0016021,GO:0009409,GO:0009408,GO:0009506,GO:0009738,GO:0030151,GO:0005886,GO:0030968,GO:0005739,	0	calnexin 1
08-30_47-aMSMS-6550.2023.2047.3.pkl	73.33	15	4	0	1	15	926	882	1.1	27.7	GO:0010105,GO:0005794,GO:0016021,GO:0005783,GO:0009723,GO:0005739,	0	green ripe-like 1
08-30_47-aMSMS-6550.2023.2047.3.pkl	80	15	3	0	1	15	1562	1606	0.32	29.3	GO:0010105,GO:0005794,GO:0016021,GO:0005783,GO:0009723,GO:0005739,	0	green ripe-like 1
08-30_47-aMSMS-6550.2895.2900.3.pkl	95.65	23	1	0	1	23	22	90	5e-08	46.6	GO:0009941,GO:0044262,GO:0009409,GO:0030060,GO:0006108,GO:0005774,GO:0010319,GO:0006099,GO:0009570,GO:0048046,GO:0005739,	EC:1.1.1.37,	malate dehydrogenase
08-30_47-aMSMS-6550.0518.0524.3.pkl	100	10	0	0	1	10	1897	1868	4.8	25.4	GO:0005774,GO:0031348,GO:0006777,GO:0006457,GO:0009867,GO:0042542,GO:0009862,GO:0016023,GO:0009505,GO:0010363,GO:0006612,GO:0005509,GO:0050832,GO:0009507,GO:0005789,GO:0043069,GO:0005794,GO:0005829,GO:0000165,GO:0009734,GO:0051082,GO:0009644,GO:0016021,GO:0009409,GO:0009408,GO:0009506,GO:0009738,GO:0030151,GO:0005886,GO:0030968,GO:0005739,	0	calnexin homolog
03-30_47-aMSMS-6550.3615.3619.2.pkl	70.59	17	5	0	2	18	1627	1577	0.028	32.7	GO:0006979,GO:0030127,GO:0006886,GO:0006888,GO:0005829,GO:0008270,GO:0009536,GO:0005215,	0	protein transport protein sec24-like at4g32640-like

## Sheet: 12 Hours
12 Hours
protein_id	%_identity	alignment_length	mismatches	gap_opens	q._start	q._end	s._start	s._end	e-value	bit_score	GO	EC	Protein name
04-30_47-aMSMS-6550.2649.2649.2.pkl	83.33	12	2	0	1	12	2283	2318	8.1	25	GO:0031977,GO:0005739,GO:0009509,GO:0016740,GO:0009570,GO:0009643,GO:0015979,GO:0006535,GO:0090322,GO:0010310,GO:0004124,	EC:2.5.1.47,	cysteine synthase
04-30_47-aMSMS-6550.3526.3526.3.pkl	100	19	0	0	1	19	459	515	2e-05	42	GO:0005774,GO:0030246,GO:0010048,GO:0048046,GO:0008270,GO:0007155,GO:0016023,GO:0009505,GO:0045010,GO:0004559,GO:0006013,GO:0009507,GO:0005829,GO:0007020,GO:0010090,GO:0048765,GO:0019344,GO:0071555,	EC:3.2.1.24,	lysosomal alpha-mannosidase
04-30_47-aMSMS-6550.3669.3697.3.pkl	81.48	27	5	0	1	27	106	26	2e-06	42.4	GO:0005774,GO:0009615,GO:0006094,GO:0048046,GO:0006457,GO:0090332,GO:0022626,GO:0009651,GO:0050832,GO:0042742,GO:0009507,GO:0005618,GO:0005794,GO:0005730,GO:0006096,GO:0006468,GO:0004674,GO:0046686,GO:0002020,GO:0009409,GO:0009408,GO:0010187,GO:0009506,GO:0005886,GO:0005524,	EC:2.7.11,	heat shock protein 70
09-30_47-aMSMS-6550.3339.3343.2.pkl	78.95	19	4	0	1	19	849	793	0.001	36.2	GO:0006013,GO:0008270,GO:0009505,GO:0005774,GO:0007020,GO:0019344,GO:0030246,GO:0004559,GO:0048046,	EC:3.2.1.24,	lysosomal alpha-mannosidase
09-30_47-aMSMS-6550.2575.2575.2.pkl	100	12	0	0	1	12	1204	1239	1.4	27.3	GO:0005737,GO:0050461,GO:0004124,GO:0050234,GO:0006535,GO:0047458,	EC:2.5.1.47,EC:4.2.1.50,EC:2.5.1.52,EC:2.5.1.51,	cysteine synthase
04-30_47-aMSMS-6550.2649.2649.2.pkl	100	12	0	0	1	12	1093	1128	1	27.7	GO:0005737,GO:0050461,GO:0004124,GO:0050234,GO:0006535,GO:0047458,	EC:2.5.1.47,EC:4.2.1.50,EC:2.5.1.52,EC:2.5.1.51,	cysteine synthase
04-30_47-aMSMS-6550.1704.1708.3.pkl	73.33	15	4	0	1	15	1988	1944	0.076	31.2	GO:0006896,GO:0080171,GO:0006886,GO:0051453,GO:0005634,GO:0030123,	0	ap3-complex subunit beta-a-like
04-30_47-aMSMS-6550.2649.2649.2.pkl	83.33	12	2	0	1	12	507	472	7.9	25	GO:0031977,GO:0005739,GO:0009509,GO:0016740,GO:0009570,GO:0009643,GO:0015979,GO:0006535,GO:0090322,GO:0010310,GO:0004124,	EC:2.5.1.47,	cysteine synthase
09-30_47-aMSMS-6550.3339.3343.2.pkl	100	19	0	0	1	19	3637	3581	2e-05	42	GO:0005774,GO:0030246,GO:0010048,GO:0048046,GO:0008270,GO:0007155,GO:0009505,GO:0004559,GO:0045010,GO:0006013,GO:0009507,GO:0005829,GO:0007020,GO:0010090,GO:0048765,GO:0019344,GO:0071555,	EC:3.2.1.24,	lysosomal alpha-mannosidase
04-30_47-aMSMS-6550.3526.3526.3.pkl	100	19	0	0	1	19	459	515	2e-05	42	GO:0005774,GO:0030246,GO:0010048,GO:0048046,GO:0008270,GO:0007155,GO:0016023,GO:0009505,GO:0045010,GO:0004559,GO:0006013,GO:0009507,GO:0005829,GO:0007020,GO:0010090,GO:0048765,GO:0019344,GO:0071555,	EC:3.2.1.24,	lysosomal alpha-mannosidase
04-30_47-aMSMS-6550.1663.1668.2.pkl	92.31	13	1	0	1	13	1351	1313	2.2	26.9	GO:0005829,GO:0009651,GO:0019388,GO:0048229,GO:0006874,GO:0019255,GO:0019252,GO:0000287,GO:0006096,GO:0009570,GO:0006094,GO:0005992,GO:0004614,GO:0009590,GO:0046686,GO:0005634,GO:0005886,GO:0010319,	EC:5.4.2.2,	cytosolic phosphoglucomutase
04-30_47-aMSMS-6550.2649.2649.2.pkl	91.67	12	1	0	1	12	549	514	2.7	26.6	GO:0004124,GO:0009509,GO:0006535,GO:0009570,GO:0016740,	EC:2.5.1.47,	cysteine synthase
04-30_47-aMSMS-6550.3526.3526.3.pkl	75	16	4	0	4	19	3909	3862	1.5	27.7	GO:0005774,GO:0030246,GO:0010048,GO:0048046,GO:0008270,GO:0007155,GO:0009505,GO:0004559,GO:0045010,GO:0006013,GO:0009507,GO:0007020,GO:0010090,GO:0048765,GO:0019344,GO:0071555,	EC:3.2.1.24,	lysosomal alpha-mannosidase
09-30_47-aMSMS-6550.2575.2575.2.pkl	83.33	12	2	0	1	12	2283	2318	8.1	25	GO:0031977,GO:0005739,GO:0009509,GO:0016740,GO:0009570,GO:0009643,GO:0015979,GO:0006535,GO:0090322,GO:0010310,GO:0004124,	EC:2.5.1.47,	cysteine synthase
04-30_47-aMSMS-6550.2649.2649.2.pkl	100	12	0	0	1	12	1318	1353	1.4	27.3	GO:0005737,GO:0050461,GO:0004124,GO:0050234,GO:0006535,GO:0047458,	EC:2.5.1.47,EC:4.2.1.50,EC:2.5.1.52,EC:2.5.1.51,	cysteine synthase
04-30_47-aMSMS-6550.2649.2649.2.pkl	100	12	0	0	1	12	1270	1305	0.87	27.7	GO:0004124,GO:0006535,GO:0016740,	EC:2.5.1.47,	cysteine synthase
04-30_47-aMSMS-6550.2649.2649.2.pkl	100	12	0	0	1	12	1344	1379	1.1	27.7	GO:0005737,GO:0050461,GO:0004124,GO:0050234,GO:0006535,GO:0047458,	EC:2.5.1.47,EC:4.2.1.50,EC:2.5.1.52,EC:2.5.1.51,	cysteine synthase
04-30_47-aMSMS-6550.1663.1668.2.pkl	92.31	13	1	0	1	13	1142	1104	2.6	26.6	GO:0006006,GO:0005737,GO:0000287,GO:0004614,	EC:5.4.2.2,	cytosolic phosphoglucomutase
04-30_47-aMSMS-6550.3526.3526.3.pkl	100	19	0	0	1	19	3400	3344	2e-05	42	GO:0005774,GO:0030246,GO:0010048,GO:0048046,GO:0008270,GO:0007155,GO:0016023,GO:0009505,GO:0045010,GO:0004559,GO:0006013,GO:0009507,GO:0005829,GO:0007020,GO:0010090,GO:0048765,GO:0019344,GO:0071555,	EC:3.2.1.24,	lysosomal alpha-mannosidase-like
09-30_47-aMSMS-6550.3339.3343.2.pkl	100	19	0	0	1	19	3637	3581	2e-05	42	GO:0005774,GO:0030246,GO:0010048,GO:0048046,GO:0008270,GO:0007155,GO:0009505,GO:0004559,GO:0045010,GO:0006013,GO:0009507,GO:0005829,GO:0007020,GO:0010090,GO:0048765,GO:0019344,GO:0071555,	EC:3.2.1.24,	lysosomal alpha-mannosidase
04-30_47-aMSMS-6550.2649.2649.2.pkl	83.33	12	2	0	1	12	507	472	7.9	25	GO:0031977,GO:0005739,GO:0009509,GO:0016740,GO:0009570,GO:0009643,GO:0015979,GO:0006535,GO:0090322,GO:0010310,GO:0004124,	EC:2.5.1.47,	cysteine synthase
04-30_47-aMSMS-6550.2649.2649.2.pkl	83.33	12	2	0	1	12	1952	1987	8.1	25	GO:0031977,GO:0005739,GO:0009509,GO:0016740,GO:0009570,GO:0009643,GO:0015979,GO:0006535,GO:0090322,GO:0010310,GO:0004124,	EC:2.5.1.47,	cysteine synthase
04-30_47-aMSMS-6550.1704.1708.3.pkl	73.33	15	4	0	1	15	4038	3994	0.065	31.6	GO:0006896,GO:0080171,GO:0006886,GO:0051453,GO:0005634,GO:0030123,	0	ap3-complex subunit beta-a-like
09-30_47-aMSMS-6550.3339.3343.2.pkl	78.95	19	4	0	1	19	849	793	0.001	36.2	GO:0006013,GO:0008270,GO:0009505,GO:0005774,GO:0007020,GO:0019344,GO:0030246,GO:0004559,GO:0048046,	EC:3.2.1.24,	lysosomal alpha-mannosidase
04-30_47-aMSMS-6550.3526.3526.3.pkl	73.68	19	5	0	1	19	530	586	0.006	34.7	GO:0005774,GO:0030246,GO:0010048,GO:0048046,GO:0008270,GO:0007155,GO:0016023,GO:0009505,GO:0045010,GO:0004559,GO:0006013,GO:0009507,GO:0007020,GO:0010090,GO:0048765,GO:0019344,GO:0071555,	EC:3.2.1.24,	lysosomal alpha-mannosidase
04-30_47-aMSMS-6550.1704.1708.3.pkl	73.33	15	4	0	1	15	4038	3994	0.065	31.6	GO:0006896,GO:0080171,GO:0006886,GO:0051453,GO:0005634,GO:0030123,	0	ap3-complex subunit beta-a-like
09-30_47-aMSMS-6550.3449.3453.0.pkl	92.31	26	2	0	1	26	1568	1491	4e-09	53.1	GO:0016020,GO:0009506,GO:0005737,GO:0055085,GO:0022857,	0	nucleobase ascorbate transporter
04-30_47-aMSMS-6550.2649.2649.2.pkl	91.67	12	1	0	1	12	549	514	2.7	26.6	GO:0004124,GO:0009509,GO:0006535,GO:0009570,GO:0016740,	EC:2.5.1.47,	cysteine synthase
09-30_47-aMSMS-6550.3339.3343.2.pkl	73.68	19	5	0	1	19	530	586	0.006	34.7	GO:0005774,GO:0030246,GO:0010048,GO:0048046,GO:0008270,GO:0007155,GO:0016023,GO:0009505,GO:0045010,GO:0004559,GO:0006013,GO:0009507,GO:0007020,GO:0010090,GO:0048765,GO:0019344,GO:0071555,	EC:3.2.1.24,	lysosomal alpha-mannosidase
04-30_47-aMSMS-6550.3526.3526.3.pkl	75	16	4	0	4	19	3909	3862	1.5	27.7	GO:0005774,GO:0030246,GO:0010048,GO:0048046,GO:0008270,GO:0007155,GO:0009505,GO:0004559,GO:0045010,GO:0006013,GO:0009507,GO:0007020,GO:0010090,GO:0048765,GO:0019344,GO:0071555,	EC:3.2.1.24,	lysosomal alpha-mannosidase
04-30_47-aMSMS-6550.2649.2649.2.pkl	100	12	0	0	1	12	1204	1239	1.4	27.3	GO:0005737,GO:0050461,GO:0004124,GO:0050234,GO:0006535,GO:0047458,	EC:2.5.1.47,EC:4.2.1.50,EC:2.5.1.52,EC:2.5.1.51,	cysteine synthase
04-30_47-aMSMS-6550.2649.2649.2.pkl	100	12	0	0	1	12	1318	1353	1.4	27.3	GO:0005737,GO:0050461,GO:0004124,GO:0050234,GO:0006535,GO:0047458,	EC:2.5.1.47,EC:4.2.1.50,EC:2.5.1.52,EC:2.5.1.51,	cysteine synthase
09-30_47-aMSMS-6550.2575.2575.2.pkl	83.33	12	2	0	1	12	1952	1987	8.1	25	GO:0031977,GO:0005739,GO:0009509,GO:0016740,GO:0009570,GO:0009643,GO:0015979,GO:0006535,GO:0090322,GO:0010310,GO:0004124,	EC:2.5.1.47,	cysteine synthase
04-30_47-aMSMS-6550.2649.2649.2.pkl	100	12	0	0	1	12	1270	1305	0.87	27.7	GO:0004124,GO:0006535,GO:0016740,	EC:2.5.1.47,	cysteine synthase
04-30_47-aMSMS-6550.3526.3526.3.pkl	100	19	0	0	1	19	3400	3344	2e-05	42	GO:0005774,GO:0030246,GO:0010048,GO:0048046,GO:0008270,GO:0007155,GO:0016023,GO:0009505,GO:0045010,GO:0004559,GO:0006013,GO:0009507,GO:0005829,GO:0007020,GO:0010090,GO:0048765,GO:0019344,GO:0071555,	EC:3.2.1.24,	lysosomal alpha-mannosidase-like
09-30_47-aMSMS-6550.2575.2575.2.pkl	100	12	0	0	1	12	1093	1128	1	27.7	GO:0005737,GO:0050461,GO:0004124,GO:0050234,GO:0006535,GO:0047458,	EC:2.5.1.47,EC:4.2.1.50,EC:2.5.1.52,EC:2.5.1.51,	cysteine synthase
04-30_47-aMSMS-6550.3642.3647.0.pkl	61.54	26	10	0	1	26	593	670	1e-04	39.7	GO:0055085,GO:0016020,GO:0022857,	0	nucleobase ascorbate transporter
04-30_47-aMSMS-6550.3642.3647.0.pkl	61.54	26	10	0	1	26	593	670	1e-04	40	GO:0055085,GO:0016020,GO:0022857,	0	nucleobase ascorbate transporter
04-30_47-aMSMS-6550.3526.3526.3.pkl	72.22	18	5	0	1	18	91	38	0.014	31.2	GO:0005774,GO:0030246,GO:0010048,GO:0048046,GO:0008270,GO:0007155,GO:0009505,GO:0004559,GO:0045010,GO:0015074,GO:0006013,GO:0009507,GO:0005829,GO:0003676,GO:0007020,GO:0010090,GO:0048765,GO:0019344,GO:0071555,	EC:3.2.1.24,	glycosyl hydrolase family 38 protein
09-30_47-aMSMS-6550.1616.1621.2.pkl	92.31	13	1	0	1	13	1351	1313	2.2	26.9	GO:0005829,GO:0009651,GO:0019388,GO:0048229,GO:0006874,GO:0019255,GO:0019252,GO:0000287,GO:0006096,GO:0009570,GO:0006094,GO:0005992,GO:0004614,GO:0009590,GO:0046686,GO:0005634,GO:0005886,GO:0010319,	EC:5.4.2.2,	cytosolic phosphoglucomutase
09-30_47-aMSMS-6550.3449.3453.0.pkl	88.46	26	3	0	1	26	712	635	3e-08	50.1	GO:0016020,GO:0009506,GO:0005737,GO:0055085,GO:0022857,	0	nucleobase-ascorbate transporter 1-like
04-30_47-aMSMS-6550.3526.3526.3.pkl	100	19	0	0	1	19	459	515	3e-05	42	GO:0005774,GO:0030246,GO:0010048,GO:0048046,GO:0008270,GO:0007155,GO:0009505,GO:0004559,GO:0045010,GO:0006013,GO:0009507,GO:0005829,GO:0007020,GO:0010090,GO:0048765,GO:0019344,GO:0071555,	EC:3.2.1.24,	lysosomal alpha-mannosidase
09-30_47-aMSMS-6550.3339.3343.2.pkl	73.68	19	5	0	1	19	202	146	0.002	33.5	GO:0006013,GO:0008270,GO:0009505,GO:0005774,GO:0016023,GO:0007020,GO:0019344,GO:0030246,GO:0004559,GO:0048046,	EC:3.2.1.24,	lysosomal alpha-mannosidase
04-30_47-aMSMS-6550.3642.3647.0.pkl	92.31	26	2	0	1	26	1568	1491	4e-09	53.1	GO:0016020,GO:0009506,GO:0005737,GO:0055085,GO:0022857,	0	nucleobase ascorbate transporter
04-30_47-aMSMS-6550.3642.3647.0.pkl	61.54	26	10	0	1	26	593	670	1e-04	39.7	GO:0055085,GO:0016020,GO:0022857,	0	nucleobase ascorbate transporter
09-30_47-aMSMS-6550.2575.2575.2.pkl	100	12	0	0	1	12	1344	1379	1.1	27.7	GO:0005737,GO:0050461,GO:0004124,GO:0050234,GO:0006535,GO:0047458,	EC:2.5.1.47,EC:4.2.1.50,EC:2.5.1.52,EC:2.5.1.51,	cysteine synthase
04-30_47-aMSMS-6550.2649.2649.2.pkl	100	12	0	0	1	12	1143	1178	0.88	27.7	GO:0005737,GO:0050461,GO:0004124,GO:0050234,GO:0006535,GO:0047458,	EC:2.5.1.47,EC:4.2.1.50,EC:2.5.1.52,EC:2.5.1.51,	cysteine synthase
04-30_47-aMSMS-6550.3526.3526.3.pkl	100	19	0	0	1	19	459	515	3e-05	42	GO:0005774,GO:0030246,GO:0010048,GO:0048046,GO:0008270,GO:0007155,GO:0009505,GO:0004559,GO:0045010,GO:0006013,GO:0009507,GO:0005829,GO:0007020,GO:0010090,GO:0048765,GO:0019344,GO:0071555,	EC:3.2.1.24,	lysosomal alpha-mannosidase
09-30_47-aMSMS-6550.2575.2575.2.pkl	100	12	0	0	1	12	1143	1178	0.88	27.7	GO:0005737,GO:0050461,GO:0004124,GO:0050234,GO:0006535,GO:0047458,	EC:2.5.1.47,EC:4.2.1.50,EC:2.5.1.52,EC:2.5.1.51,	cysteine synthase
04-30_47-aMSMS-6550.1704.1708.3.pkl	73.33	15	4	0	1	15	1988	1944	0.076	31.2	GO:0006896,GO:0080171,GO:0006886,GO:0051453,GO:0005634,GO:0030123,	0	ap3-complex subunit beta-a-like
04-30_47-aMSMS-6550.3642.3647.0.pkl	61.54	26	10	0	1	26	593	670	1e-04	40	GO:0055085,GO:0016020,GO:0022857,	0	nucleobase ascorbate transporter

## Sheet: 24 Hours
24 Hours
protein_id	%_identity	alignment_length	mismatches	gap_opens	q._start	q._end	s._start	s._end	e-value	bit_score	GO	EC	Protein name
05-30_47-aMSMS-6550.3063.3067.3.pkl	100	20	0	0	1	20	600	541	4e-05	40.4	GO:0005829,GO:0005777,GO:0006098,GO:0009651,GO:0043090,GO:0010359,GO:0009750,GO:0009749,GO:0009744,GO:0019521,GO:0006888,GO:0009570,GO:0004616,GO:0050661,	EC:1.1.1.44,	6-phosphogluconate dehydrogenase
05-30_47-aMSMS-6550.3408.3410.3.pkl	63.64	22	8	0	1	22	1248	1183	0.17	30.4	GO:0006468,GO:0005524,GO:0000186,GO:0004709,GO:0004715,GO:0000165,	EC:2.7.10.2,EC:2.7.11.25,EC:2.7.11,	protein
05-30_47-aMSMS-6550.3072.3072.2.pkl	100	20	0	0	1	20	2175	2116	1e-04	39.7	GO:0005829,GO:0009414,GO:0005739,GO:0006098,GO:0009651,GO:0009506,GO:0009409,GO:0009750,GO:0009749,GO:0052546,GO:0009744,GO:0019521,GO:0009570,GO:0004616,GO:0050661,GO:0046686,GO:0009737,GO:0016020,GO:0052541,	EC:1.1.1.44,	6-phosphogluconate dehydrogenase
10-30_47-aMSMS-6550.2869.2869.3.pkl	100	20	0	0	1	20	600	541	4e-05	40.4	GO:0005829,GO:0005777,GO:0006098,GO:0009651,GO:0043090,GO:0010359,GO:0009750,GO:0009749,GO:0009744,GO:0019521,GO:0006888,GO:0009570,GO:0004616,GO:0050661,	EC:1.1.1.44,	6-phosphogluconate dehydrogenase
05-30_47-aMSMS-6550.1816.1820.3.pkl	76.92	13	3	0	1	13	1228	1190	3.5	26.2	GO:0005634,GO:0009536,	0	protein
05-30_47-aMSMS-6550.3408.3410.3.pkl	72.73	22	6	0	1	22	1381	1316	0.005	35.4	GO:0006468,GO:0005524,GO:0004674,	EC:2.7.11,	cysteine-rich receptor-like protein kinase 10- partial
05-30_47-aMSMS-6550.3408.3410.3.pkl	63.64	22	8	0	1	22	1647	1712	0.21	30.4	GO:0006468,GO:0005524,GO:0004674,	EC:2.7.11,	g-type lectin s-receptor-like serine threonine-protein kinase at1g67520-like
05-30_47-aMSMS-6550.3408.3410.3.pkl	63.64	22	8	0	1	22	1773	1708	3.3	26.6	GO:0005829,GO:0006468,GO:0004674,GO:0005739,GO:0006098,GO:0005524,GO:0004616,GO:0050662,GO:0048544,GO:0030246,GO:0005886,	EC:1.1.1.44,EC:2.7.11,	protein
05-30_47-aMSMS-6550.3063.3067.3.pkl	100	20	0	0	1	20	275	334	2e-04	39.3	GO:0005829,GO:0009414,GO:0005739,GO:0006098,GO:0009651,GO:0009506,GO:0009409,GO:0009750,GO:0009749,GO:0052546,GO:0009744,GO:0019521,GO:0009570,GO:0004616,GO:0050661,GO:0046686,GO:0009737,GO:0016020,GO:0052541,	EC:1.1.1.44,	6-phosphogluconate dehydrogenase
10-30_47-aMSMS-6550.1788.1788.3.pkl	76.92	13	3	0	1	13	1391	1353	3.8	26.2	GO:0005634,GO:0009536,	0	protein
05-30_47-aMSMS-6550.3408.3410.3.pkl	63.64	22	8	0	1	22	2027	2092	1.3	28.1	GO:0046777,GO:0009506,GO:0031625,GO:0005524,GO:0048544,GO:0005773,GO:0004675,GO:0005886,	EC:2.7.11,	ark3
05-30_47-aMSMS-6550.3408.3410.3.pkl	63.64	22	8	0	1	22	1610	1545	0.81	28.5	GO:0004715,GO:0030247,GO:0005886,GO:0048544,GO:0006468,GO:0005524,GO:0004674,	EC:2.7.10.2,EC:2.7.11,	g-type lectin s-receptor-like serine threonine-protein kinase at4g03230-like
10-30_47-aMSMS-6550.2938.2941.5.pkl	51.85	27	13	0	3	29	1110	1030	0.001	37.4	GO:0046777,GO:0009506,GO:0031625,GO:0005524,GO:0048544,GO:0007178,GO:0005773,GO:0004675,GO:0005886,	EC:2.7.11,	receptor-like serine threonine protein kinase ark3
05-30_47-aMSMS-6550.3408.3410.3.pkl	63.64	22	8	0	1	22	1137	1072	0.93	28.5	GO:0046777,GO:0009506,GO:0031625,GO:0005524,GO:0048544,GO:0007178,GO:0005773,GO:0004675,GO:0005886,	EC:2.7.11,	receptor-like serine threonine protein kinase ark3
05-30_47-aMSMS-6550.3408.3410.3.pkl	63.64	22	8	0	1	22	1532	1597	0.57	28.9	GO:0004715,GO:0006468,GO:0005524,GO:0004674,	EC:2.7.10.2,EC:2.7.11,	protein
10-30_47-aMSMS-6550.2938.2941.5.pkl	46.67	30	15	1	1	29	1573	1662	0.012	34.3	GO:0006468,GO:0004674,GO:0005524,GO:0007154,	EC:2.7.11,	cysteine-rich receptor-like protein kinase
10-30_47-aMSMS-6550.2938.2941.5.pkl	40.74	27	16	0	4	30	69	149	0.042	32	GO:0006468,GO:0050254,GO:0005524,GO:0000186,GO:0004709,GO:0000165,	EC:2.7.11.25,EC:2.7.11.14,EC:2.7.11,	protein
05-30_47-aMSMS-6550.3408.3410.3.pkl	63.64	22	8	0	1	22	1415	1350	3.2	26.6	GO:0030246,GO:0005886,GO:0048544,GO:0006468,GO:0005524,GO:0004674,	EC:2.7.11,	protein
05-30_47-aMSMS-6550.0542.0546.3.pkl	81.82	11	2	0	1	11	1451	1483	6.6	25.4	GO:0006508,GO:0004190,GO:0006629,	EC:3.4.23,	aspartic proteinase
05-30_47-aMSMS-6550.2817.2833.2.pkl	94.12	17	1	0	1	17	1742	1792	8e-05	40	GO:0042802,GO:0006468,GO:0005524,GO:0000287,GO:0009507,GO:0005634,GO:0004674,	EC:2.7.11,	tousled-like kinase
05-30_47-aMSMS-6550.3408.3410.3.pkl	63.64	22	8	0	1	22	1415	1350	3.3	26.6	GO:0005829,GO:0006468,GO:0004674,GO:0005739,GO:0006098,GO:0005524,GO:0004616,GO:0050662,GO:0048544,GO:0030246,GO:0005886,	EC:1.1.1.44,EC:2.7.11,	protein
05-30_47-aMSMS-6550.3408.3410.3.pkl	68.18	22	7	0	1	22	1617	1682	0.064	32	GO:0006468,GO:0004674,GO:0005524,GO:0050794,	EC:2.7.11,	protein
05-30_47-aMSMS-6550.3408.3410.3.pkl	72.73	22	6	0	1	22	133	68	0.004	32.7	GO:0006468,GO:0004674,GO:0009626,GO:0042742,GO:0002679,GO:0016023,GO:0005524,GO:0010200,GO:0002237,GO:0048544,GO:0005576,GO:0006865,	EC:2.7.11,	cysteine-rich receptor-like protein kinase
05-30_47-aMSMS-6550.3408.3410.3.pkl	63.64	22	8	0	1	22	1202	1137	1.1	28.1	GO:0046777,GO:0009506,GO:0031625,GO:0005524,GO:0048544,GO:0005773,GO:0004675,GO:0005886,	EC:2.7.11,	ark3
05-30_47-aMSMS-6550.2568.2573.3.pkl	84.21	19	3	0	1	19	668	724	2e-04	38.9	GO:0005634,	0	protein
10-30_47-aMSMS-6550.2938.2941.5.pkl	39.29	28	17	0	3	30	1221	1138	0.025	33.5	GO:0006468,GO:0005524,GO:0000186,GO:0004709,GO:0004715,GO:0000165,	EC:2.7.10.2,EC:2.7.11.25,EC:2.7.11,	protein
05-30_47-aMSMS-6550.3408.3410.3.pkl	63.64	22	8	0	1	22	2027	2092	1.3	28.1	GO:0046777,GO:0009506,GO:0031625,GO:0005524,GO:0048544,GO:0005773,GO:0004675,GO:0005886,	EC:2.7.11,	ark3
05-30_47-aMSMS-6550.2571.2575.3.pkl	82.35	17	3	0	1	17	1235	1285	0.006	34.7	GO:0046872,GO:0004722,GO:0005886,GO:0006470,GO:0016021,GO:0005739,	0	protein phosphatase
05-30_47-aMSMS-6550.3408.3410.3.pkl	54.55	22	10	0	1	22	468	533	0.76	28.1	GO:0004715,GO:0000186,GO:0005773,GO:0003964,GO:0048544,GO:0005576,GO:0006468,GO:0000165,GO:0006278,GO:0004709,GO:0003723,GO:0005524,	EC:2.7.10.2,EC:2.7.11.25,EC:2.7.11,EC:2.7.7.49,	cysteine-rich receptor-like protein kinase
10-30_47-aMSMS-6550.2938.2941.5.pkl	46.15	26	14	0	5	30	1382	1305	0.019	33.9	GO:0030246,GO:0005886,GO:0048544,GO:0006468,GO:0005524,GO:0004674,	EC:2.7.11,	protein
05-30_47-aMSMS-6550.3408.3410.3.pkl	63.64	22	8	0	1	22	1560	1625	0.17	30.4	GO:0006468,GO:0005524,GO:0000186,GO:0004709,GO:0004715,GO:0000165,	EC:2.7.10.2,EC:2.7.11.25,EC:2.7.11,	protein
05-30_47-aMSMS-6550.3408.3410.3.pkl	63.64	22	8	0	1	22	1415	1350	3.2	26.6	GO:0030246,GO:0005886,GO:0048544,GO:0006468,GO:0005524,GO:0004674,	EC:2.7.11,	receptor-like protein kinase
10-30_47-aMSMS-6550.2938.2941.5.pkl	48.15	27	14	0	4	30	2584	2504	0.002	36.6	GO:0006468,GO:0050254,GO:0005524,GO:0000186,GO:0004709,GO:0048544,GO:0004714,GO:0005886,GO:0000165,	EC:2.7.11.25,EC:2.7.10.1,EC:2.7.11.14,EC:2.7.11,	protein
05-30_47-aMSMS-6550.2817.2833.2.pkl	94.12	17	1	0	1	17	1041	991	8e-05	40	GO:0042802,GO:0006468,GO:0005524,GO:0000287,GO:0009507,GO:0005634,GO:0004674,	EC:2.7.11,	tousled-like kinase
05-30_47-aMSMS-6550.1641.1646.2.pkl	100	11	0	0	1	11	351	383	6	25	GO:0009789,GO:0006094,GO:0046470,GO:0005546,GO:0005515,GO:0010119,GO:0006833,GO:0004630,GO:0016042,GO:0009651,GO:0005509,GO:0009507,GO:0048767,GO:0006972,GO:0005829,GO:0007030,GO:0006631,GO:0006096,GO:0009845,GO:0070290,GO:0046686,GO:0009506,GO:0009266,GO:0009737,GO:0030136,GO:0005886,GO:0005634,GO:0005739,	EC:3.1.4.4,	phospholipase d alpha
10-30_47-aMSMS-6550.2938.2941.5.pkl	48.15	27	14	0	4	30	1507	1427	0.002	36.6	GO:0005886,GO:0048544,GO:0006468,GO:0005524,GO:0004674,	EC:2.7.11,	protein
05-30_47-aMSMS-6550.3408.3410.3.pkl	59.09	22	9	0	1	22	1209	1144	2.3	26.9	GO:0006468,GO:0005524,GO:0000186,GO:0004709,GO:0000165,	EC:2.7.11.25,EC:2.7.11,	cysteine-rich receptor-like protein kinase 25-like isoform 2
05-30_47-aMSMS-6550.3408.3410.3.pkl	63.64	22	8	0	1	22	1532	1597	0.57	28.9	GO:0004715,GO:0006468,GO:0005524,GO:0004674,	EC:2.7.10.2,EC:2.7.11,	protein
10-30_47-aMSMS-6550.2938.2941.5.pkl	52	25	12	0	4	28	3483	3409	0.005	35.4	GO:0046872,GO:0004722,GO:0005886,GO:0006470,GO:0016021,GO:0005739,	0	protein phosphatase
10-30_47-aMSMS-6550.2938.2941.5.pkl	39.29	28	17	0	3	30	1221	1138	0.025	33.5	GO:0006468,GO:0005524,GO:0000186,GO:0004709,GO:0004715,GO:0000165,	EC:2.7.10.2,EC:2.7.11.25,EC:2.7.11,	protein
05-30_47-aMSMS-6550.3408.3410.3.pkl	63.64	22	8	0	1	22	1537	1472	0.67	28.9	GO:0005886,GO:0048544,GO:0006468,GO:0005524,GO:0004674,	EC:2.7.11,	protein
05-30_47-aMSMS-6550.3408.3410.3.pkl	72.73	22	6	0	1	22	1381	1316	0.005	35.4	GO:0006468,GO:0005524,GO:0004674,	EC:2.7.11,	cysteine-rich receptor-like protein kinase 10- partial
05-30_47-aMSMS-6550.3408.3410.3.pkl	72.73	22	6	0	1	22	39	104	0.07	31.2	GO:0006468,GO:0050254,GO:0005524,GO:0000186,GO:0004709,GO:0000165,	EC:2.7.11.25,EC:2.7.11.14,EC:2.7.11,	protein
10-30_47-aMSMS-6550.2938.2941.5.pkl	51.85	27	13	0	3	29	1176	1096	7e-04	38.1	GO:0006468,GO:0005524,GO:0000186,GO:0004709,GO:0000165,	EC:2.7.11.25,EC:2.7.11,	cysteine-rich receptor-like protein kinase 25-like isoform 2
05-30_47-aMSMS-6550.3408.3410.3.pkl	63.64	22	8	0	1	22	1415	1350	3.3	26.6	GO:0005829,GO:0006468,GO:0004674,GO:0005739,GO:0006098,GO:0005524,GO:0004616,GO:0050662,GO:0048544,GO:0030246,GO:0005886,	EC:1.1.1.44,EC:2.7.11,	protein
05-30_47-aMSMS-6550.3408.3410.3.pkl	63.64	22	8	0	1	22	2027	2092	1.3	28.1	GO:0046777,GO:0009506,GO:0031625,GO:0005524,GO:0048544,GO:0005773,GO:0004675,GO:0005886,	EC:2.7.11,	ark3
05-30_47-aMSMS-6550.3408.3410.3.pkl	63.64	22	8	0	1	22	1773	1708	3.3	26.6	GO:0005829,GO:0006468,GO:0004674,GO:0005739,GO:0006098,GO:0005524,GO:0004616,GO:0050662,GO:0048544,GO:0030246,GO:0005886,	EC:1.1.1.44,EC:2.7.11,	protein
10-30_47-aMSMS-6550.2938.2941.5.pkl	46.15	26	14	0	5	30	1382	1305	0.019	33.9	GO:0030246,GO:0005886,GO:0048544,GO:0006468,GO:0005524,GO:0004674,	EC:2.7.11,	receptor-like protein kinase
05-30_47-aMSMS-6550.0542.0546.3.pkl	81.82	11	2	0	1	11	1058	1090	6.1	25.4	GO:0006508,GO:0004190,GO:0006629,	EC:3.4.23,	aspartic proteinase
05-30_47-aMSMS-6550.3408.3410.3.pkl	63.64	22	8	0	1	22	1202	1137	1.1	28.1	GO:0046777,GO:0009506,GO:0031625,GO:0005524,GO:0048544,GO:0005773,GO:0004675,GO:0005886,	EC:2.7.11,	ark3
05-30_47-aMSMS-6550.3408.3410.3.pkl	63.64	22	8	0	1	22	1810	1875	0.57	28.9	GO:0004715,GO:0006468,GO:0005524,GO:0004674,	EC:2.7.10.2,EC:2.7.11,	g-type lectin s-receptor-like serine threonine-protein kinase at1g67520-like
05-30_47-aMSMS-6550.3072.3072.2.pkl	100	20	0	0	1	20	275	334	2e-04	39.3	GO:0005829,GO:0009414,GO:0005739,GO:0006098,GO:0009651,GO:0009506,GO:0009409,GO:0009750,GO:0009749,GO:0052546,GO:0009744,GO:0019521,GO:0009570,GO:0004616,GO:0050661,GO:0046686,GO:0009737,GO:0016020,GO:0052541,	EC:1.1.1.44,	6-phosphogluconate dehydrogenase
05-30_47-aMSMS-6550.3408.3410.3.pkl	63.64	22	8	0	1	22	2027	2092	1.3	28.1	GO:0046777,GO:0009506,GO:0031625,GO:0005524,GO:0048544,GO:0005773,GO:0004675,GO:0005886,	EC:2.7.11,	ark3
10-30_47-aMSMS-6550.2938.2941.5.pkl	46.15	26	14	0	5	30	1303	1226	0.025	33.5	GO:0006468,GO:0005524,GO:0000186,GO:0004709,GO:0000165,	EC:2.7.11.25,EC:2.7.11,	cysteine-rich receptor-like protein kinase
10-30_47-aMSMS-6550.2404.2409.3.pkl	84.21	19	3	0	1	19	668	724	2e-04	38.9	GO:0005634,	0	protein
05-30_47-aMSMS-6550.0542.0546.3.pkl	81.82	11	2	0	1	11	1058	1090	6.1	25.4	GO:0006508,GO:0004190,GO:0006629,	EC:3.4.23,	aspartic proteinase
10-30_47-aMSMS-6550.2938.2941.5.pkl	46.43	28	15	0	3	30	1914	1997	0.006	35.4	GO:0006468,GO:0004674,GO:0005524,GO:0050794,	EC:2.7.11,	protein
05-30_47-aMSMS-6550.3408.3410.3.pkl	63.64	22	8	0	1	22	2027	2092	1.3	28.1	GO:0046777,GO:0009506,GO:0031625,GO:0005524,GO:0048544,GO:0005773,GO:0004675,GO:0005886,	EC:2.7.11,	ark3
10-30_47-aMSMS-6550.1614.1614.2.pkl	100	11	0	0	1	11	1783	1815	8.5	25	GO:0005509,GO:0009536,GO:0004630,GO:0034638,GO:0070290,GO:0005773,GO:0005783,GO:0005886,	EC:3.1.4.4,	phospholipase d alpha
05-30_47-aMSMS-6550.1816.1820.3.pkl	76.92	13	3	0	1	13	1391	1353	3.8	26.2	GO:0005634,GO:0009536,	0	protein
10-30_47-aMSMS-6550.0579.0582.3.pkl	81.82	11	2	0	1	11	1451	1483	6.6	25.4	GO:0006508,GO:0004190,GO:0006629,	EC:3.4.23,	aspartic proteinase
05-30_47-aMSMS-6550.2568.2573.3.pkl	84.21	19	3	0	1	19	732	676	2e-04	38.9	GO:0005634,	0	protein
05-30_47-aMSMS-6550.3408.3410.3.pkl	63.64	22	8	0	1	22	1810	1875	0.57	28.9	GO:0004715,GO:0006468,GO:0005524,GO:0004674,	EC:2.7.10.2,EC:2.7.11,	g-type lectin s-receptor-like serine threonine-protein kinase at1g67520-like
05-30_47-aMSMS-6550.1641.1646.2.pkl	100	11	0	0	1	11	1783	1815	8.5	25	GO:0005509,GO:0009536,GO:0004630,GO:0034638,GO:0070290,GO:0005773,GO:0005783,GO:0005886,	EC:3.1.4.4,	phospholipase d alpha
05-30_47-aMSMS-6550.3408.3410.3.pkl	63.64	22	8	0	1	22	1415	1350	3.2	26.6	GO:0030246,GO:0005886,GO:0048544,GO:0006468,GO:0005524,GO:0004674,	EC:2.7.11,	protein
05-30_47-aMSMS-6550.3408.3410.3.pkl	63.64	22	8	0	1	22	1775	1840	0.93	28.5	GO:0046777,GO:0009506,GO:0031625,GO:0005524,GO:0048544,GO:0007178,GO:0005773,GO:0004675,GO:0005886,	EC:2.7.11,	receptor-like serine threonine protein kinase ark3
10-30_47-aMSMS-6550.2869.2869.3.pkl	100	20	0	0	1	20	2175	2116	1e-04	39.7	GO:0005829,GO:0009414,GO:0005739,GO:0006098,GO:0009651,GO:0009506,GO:0009409,GO:0009750,GO:0009749,GO:0052546,GO:0009744,GO:0019521,GO:0009570,GO:0004616,GO:0050661,GO:0046686,GO:0009737,GO:0016020,GO:0052541,	EC:1.1.1.44,	6-phosphogluconate dehydrogenase
05-30_47-aMSMS-6550.3408.3410.3.pkl	68.18	22	7	0	1	22	1887	1952	0.074	31.6	GO:0006468,GO:0004674,GO:0005524,GO:0050794,	EC:2.7.11,	protein
05-30_47-aMSMS-6550.3072.3072.2.pkl	100	20	0	0	1	20	19	78	8e-06	40.4	GO:0005829,GO:0005777,GO:0006098,GO:0009651,GO:0043090,GO:0010359,GO:0009750,GO:0009749,GO:0009744,GO:0019521,GO:0006888,GO:0009570,GO:0004616,GO:0050661,	EC:1.1.1.44,	6-phosphogluconate dehydrogenase
05-30_47-aMSMS-6550.0542.0546.3.pkl	81.82	11	2	0	1	11	155	187	5.8	23.5	GO:0005829,GO:0006629,GO:0006623,GO:0009651,GO:0009506,GO:0009266,GO:0006508,GO:0006972,GO:0006833,GO:0048513,GO:0007030,GO:0006096,GO:0004190,GO:0005576,GO:0005773,GO:0046686,	EC:3.4.23,	aspartic proteinase
10-30_47-aMSMS-6550.2938.2941.5.pkl	48.15	27	14	0	4	30	2584	2504	0.002	36.6	GO:0006468,GO:0050254,GO:0005524,GO:0000186,GO:0004709,GO:0048544,GO:0004714,GO:0005886,GO:0000165,	EC:2.7.11.25,EC:2.7.10.1,EC:2.7.11.14,EC:2.7.11,	protein
05-30_47-aMSMS-6550.3408.3410.3.pkl	72.73	22	6	0	1	22	1336	1271	0.029	32.7	GO:0006468,GO:0005524,GO:0000186,GO:0004709,GO:0000165,	EC:2.7.11.25,EC:2.7.11,	cysteine-rich receptor-like protein kinase
05-30_47-aMSMS-6550.3408.3410.3.pkl	72.73	22	6	0	1	22	1555	1620	0.004	35.4	GO:0006468,GO:0004674,GO:0005524,GO:0007154,	EC:2.7.11,	cysteine-rich receptor-like protein kinase
05-30_47-aMSMS-6550.2817.2833.2.pkl	94.12	17	1	0	1	17	1742	1792	8e-05	40	GO:0042802,GO:0006468,GO:0005524,GO:0000287,GO:0009507,GO:0005634,GO:0004674,	EC:2.7.11,	tousled-like kinase
10-30_47-aMSMS-6550.1788.1788.3.pkl	76.92	13	3	0	1	13	1228	1190	3.5	26.2	GO:0005634,GO:0009536,	0	protein
05-30_47-aMSMS-6550.0542.0546.3.pkl	81.82	11	2	0	1	11	1153	1185	6.5	25.4	GO:0006508,GO:0004190,GO:0006629,	EC:3.4.23,	aspartic proteinase
05-30_47-aMSMS-6550.3408.3410.3.pkl	63.64	22	8	0	1	22	1610	1545	0.81	28.5	GO:0004715,GO:0030247,GO:0005886,GO:0048544,GO:0006468,GO:0005524,GO:0004674,	EC:2.7.10.2,EC:2.7.11,	g-type lectin s-receptor-like serine threonine-protein kinase at4g03230-like
05-30_47-aMSMS-6550.3408.3410.3.pkl	63.64	22	8	0	1	22	1495	1430	0.93	28.5	GO:0046777,GO:0009506,GO:0031625,GO:0005524,GO:0048544,GO:0007178,GO:0005773,GO:0004675,GO:0005886,	EC:2.7.11,	receptor-like serine threonine protein kinase ark3
05-30_47-aMSMS-6550.2817.2833.2.pkl	94.12	17	1	0	1	17	1041	991	8e-05	40	GO:0042802,GO:0006468,GO:0005524,GO:0000287,GO:0009507,GO:0005634,GO:0004674,	EC:2.7.11,	tousled-like kinase
05-30_47-aMSMS-6550.3408.3410.3.pkl	63.64	22	8	0	1	22	2027	2092	1.3	28.1	GO:0046777,GO:0009506,GO:0031625,GO:0005524,GO:0048544,GO:0005773,GO:0004675,GO:0005886,	EC:2.7.11,	ark3
05-30_47-aMSMS-6550.3408.3410.3.pkl	54.55	22	10	0	1	22	424	489	0.72	28.1	GO:0004715,GO:0000186,GO:0005773,GO:0003964,GO:0048544,GO:0005576,GO:0006468,GO:0000165,GO:0006278,GO:0004709,GO:0003723,GO:0005524,	EC:2.7.10.2,EC:2.7.11.25,EC:2.7.11,EC:2.7.7.49,	cysteine-rich receptor-like protein kinase
05-30_47-aMSMS-6550.3408.3410.3.pkl	63.64	22	8	0	1	22	1415	1350	3.2	26.6	GO:0030246,GO:0005886,GO:0048544,GO:0006468,GO:0005524,GO:0004674,	EC:2.7.11,	protein
05-30_47-aMSMS-6550.3408.3410.3.pkl	68.18	22	7	0	1	22	1617	1682	0.064	32	GO:0006468,GO:0004674,GO:0005524,GO:0050794,	EC:2.7.11,	protein
05-30_47-aMSMS-6550.0542.0546.3.pkl	81.82	11	2	0	1	11	1467	1435	6.5	25.4	GO:0006508,GO:0004190,GO:0006629,	EC:3.4.23,	aspartic proteinase
05-30_47-aMSMS-6550.2817.2833.2.pkl	94.12	17	1	0	1	17	1095	1045	8e-05	40	GO:0042802,GO:0006468,GO:0005524,GO:0000287,GO:0009507,GO:0005634,GO:0004674,	EC:2.7.11,	tousled-like kinase
05-30_47-aMSMS-6550.1641.1646.2.pkl	100	11	0	0	1	11	351	383	6	25	GO:0009789,GO:0006094,GO:0046470,GO:0005546,GO:0005515,GO:0010119,GO:0006833,GO:0004630,GO:0016042,GO:0009651,GO:0005509,GO:0009507,GO:0048767,GO:0006972,GO:0005829,GO:0007030,GO:0006631,GO:0006096,GO:0009845,GO:0070290,GO:0046686,GO:0009506,GO:0009266,GO:0009737,GO:0030136,GO:0005886,GO:0005634,GO:0005739,	EC:3.1.4.4,	phospholipase d alpha
05-30_47-aMSMS-6550.3408.3410.3.pkl	63.64	22	8	0	1	22	1647	1712	0.21	30.4	GO:0006468,GO:0005524,GO:0004674,	EC:2.7.11,	g-type lectin s-receptor-like serine threonine-protein kinase at1g67520-like
